# Supplementary material for: ISG15 Differentially Modulates Clade Ib and II MPXV Infection
Source: Research Square preprint supplement (doi:10.21203/rs.3.rs-7774452/v1), 2025-10-16
Supplement: Supplementary file 2 [file 63a589269dbfb0a0538eb4de.docx]

| **Name** | **Gene** | **fold_change** | **p_value_adj_neg_log10** |
| --- | --- | --- | --- |
| P31254 | Uba1y | 7.86702 | 6.074963 |
| P28651 | Ca8 | 7.690197 | 2.811607 |
| Q9Z0N2 | Eif2s3y | 7.346322 | 5.456448 |
| Q8VIN1 | Pbp2 | 6.953952 | 5.956517 |
| Q64524 | H2bc21 | 6.609516 | 5.595097 |
| Q6WVG3 | Kctd12 | 6.375793 | 5.304891 |
| Q03526 | Itk | 6.217067 | 2.9875 |
| Q80TL0 | Ppm1e | 6.158606 | 5.108152 |
| P08553 | Nefm | 6.05705 | 3.022103 |
| P00920 | Ca2 | 5.982996 | 2.482957 |
| Q9DAJ5 | Dynlrb2 | 5.951981 | 3.997648 |
| P30275 | Ckmt1 | 5.84519 | 4.7909 |
| P30275 | Ckmt1 | 5.622895 | 5.087465 |
| Q9EQF6 | Dpysl5 | 5.512879 | 3.167655 |
| Q04447 | Ckb | 5.504126 | 4.198785 |
| Q91WT9 | Cbs | 5.452658 | 3.942589 |
| Q6PIC6 | Atp1a3 | 5.340032 | 3.72971 |
| P16125 | Ldhb | 4.909165 | 3.430386 |
| Q9CZC8 | Scrn1 | 4.859599 | 3.769759 |
| Q8VHG2 | Amot | 4.857367 | 4.164245 |
| P61458 | Pcbd1 | 4.674389 | 2.23828 |
| Q60611 | Satb1 | 4.672847 | 3.063354 |
| Q80ZN9 | Cox6b2 | 4.513679 | 4.24444 |
| P19639 | Gstm3 | 4.497787 | 5.439866 |
| O55111 | Dsg2 | 4.377389 | 5.054813 |
| Q8JZV9 | Bdh2 | 4.330755 | 3.379827 |
| Q8R0P4 | Aamdc | 4.323382 | 2.763654 |
| Q9JHI5 | Ivd | 4.220503 | 3.379827 |
| P56371 | Rab4a | 4.21081 | 3.876114 |
| P58321 | Uchl4 | 4.185809 | 3.028424 |
| Q3U0J8 | Tbc1d2b | 4.164026 | 2.804886 |
| P23198 | Cbx3 | 4.163917 | 2.897516 |
| Q8K157 | Galm | 4.15893 | 2.741563 |
| Q62148 | Aldh1a2 | 4.142066 | 4.061741 |
| A0A7H0DN63 | OPG091 | 4.082877 | 2.920635 |
| O55042 | Snca | 4.013103 | 3.125568 |
| Q91ZE0 | Tmlhe | 3.914603 | 3.370554 |
| Q61474 | Msi1 | 3.90788 | 4.744181 |
| Q9D5J6 | Shpk | 3.890427 | 2.798672 |
| Q9ET01 | Pygl | 3.886572 | 3.518834 |
| Q9CZS1 | Aldh1b1 | 3.883205 | 2.881585 |
| P17183 | Eno2 | 3.846316 | 3.674192 |
| Q8C779 | Radx | 3.836203 | 3.961951 |
| B1AVY7 | Kif16b | 3.82628 | 3.66638 |
| Q45KJ6 | Lin28b | 3.806223 | 2.42157 |
| Q62440 | Tle1 | 3.801891 | 3.828987 |
| Q6PDS3 | Sarm1 | 3.800509 | 3.624601 |
| P70265 | Pfkfb2 | 3.797463 | 2.584403 |
| O35188 | Cx3cl1 | 3.790675 | 3.495475 |
| Q9QXG2 | Chm | 3.78731 | 4.537191 |
| P17879 | Hspa1b | 3.780615 | 6.160931 |
| O54950 | Prkag1 | 3.768575 | 2.136282 |
| P14094 | Atp1b1 | 3.69856 | 3.297778 |
| Q8BTG3 | Tcp11l1 | 3.67866 | 2.325966 |
| Q9D711 | Pir | 3.654664 | 4.445253 |
| P16381 | D1Pas1 | 3.624864 | 4.456646 |
| P70207 | Plxna2 | 3.582124 | 6.239839 |
| Q3B7Z2 | Osbp | 3.540981 | 2.988364 |
| Q8BGV0 | Nars2 | 3.536312 | 4.126686 |
| Q3UQ44 | Iqgap2 | 3.526617 | 3.337038 |
| Q9DD02 | Hikeshi | 3.469394 | 4.535802 |
| G5E8K5 | Ank3 | 3.465963 | 2.13806 |
| Q8VCK3 | Tubg2 | 3.445728 | 2.614376 |
| Q9DA03 | Lyrm7 | 3.405299 | 4.293579 |
| O70209 | Pdlim3 | 3.394728 | 3.435187 |
| A0A7H0DNE0 | OPG172 | 3.382731 | 3.182812 |
| P16627 | Hspa1l | 3.375531 | 4.508454 |
| O08664 | Bcl7c | 3.373004 | 4.858477 |
| Q9CQE5 | Rgs10 | 3.348372 | 3.590737 |
| P22227 | Zfp42 | 3.34597 | 2.986546 |
| P08551 | Nefl | 3.344637 | 3.339316 |
| Q9QYB2 | Dach1 | 3.338752 | 2.216006 |
| Q9QYB8 | Add2 | 3.327973 | 2.728889 |
| Q8K0E1 | Kctd15 | 3.322416 | 3.048726 |
| O55042 | Snca | 3.317649 | 3.222844 |
| P28738 | Kif5c | 3.313331 | 3.992351 |
| Q60936 | Coq8a | 3.302029 | 3.621765 |
| Q9CPU0 | Glo1 | 3.294265 | 5.685615 |
| O70456 | Sfn | 3.267751 | 2.548993 |
| Q3U564 | Dcp1b | 3.197542 | 3.889186 |
| P55271 | Cdkn2b | 3.194061 | 6.384665 |
| Q9JME5 | Ap3b2 | 3.18186 | 3.064046 |
| Q58A65 | Spag9 | 3.174653 | 3.57018 |
| A0A7H0DN71 | OPG099 | 3.146729 | 2.191106 |
| Q9QZW9 | Mnx1 | 3.13245 | 3.763065 |
| Q62441 | Tle4 | 3.118681 | 3.706003 |
| P97447 | Fhl1 | 3.038845 | 6.0066 |
| P97313 | Prkdc | 3.031582 | 3.076882 |
| P48193 | Epb41 | 3.027936 | 2.608244 |
| Q9D114 | Hddc3 | 3.015333 | 4.194378 |
| P68254 | Ywhaq | 3.008529 | 4.265818 |
| P59024 | Fkbp14 | 3.007056 | 2.304948 |
| Q641K1 | Agtpbp1 | 3.00481 | 3.257008 |
| O55091 | Impact | 3.004605 | 2.242686 |
| Q9JI91 | Actn2 | 3.000473 | 5.372594 |
| A0A7H0DN26 | OPG053 | 2.992628 | 2.713898 |
| Q8CAV0 | Ybey | 2.987834 | 2.57863 |
| Q04447 | Ckb | 2.981148 | 5.301412 |
| Q60899 | Elavl2 | 2.980379 | 4.315603 |
| Q8R1G2 | Cmbl | 2.977596 | 3.666684 |
| Q5BKP2 | Usp13 | 2.973174 | 2.646462 |
| Q8CAK1 | Iba57 | 2.958424 | 3.652027 |
| Q8K4G5 | Ablim1 | 2.923116 | 5.013779 |
| Q3UYC0 | Ppm1h | 2.877644 | 3.366594 |
| Q3UIW5 | Rnf10 | 2.837022 | 2.208909 |
| Q8BRK8 | Prkaa2 | 2.836796 | 2.574072 |
| P11679 | Krt8 | 2.831579 | 2.161531 |
| Q9D1H6 | Ndufaf4 | 2.810738 | 2.708533 |
| Q9D920 | Borcs5 | 2.807919 | 2.121702 |
| P05213 | Tuba1b | 2.805174 | 3.596923 |
| O54788 | Dffb | 2.779297 | 2.401073 |
| P0C027 | Nudt10 | 2.748453 | 2.215096 |
| Q8K4I3 | Arhgef6 | 2.741039 | 2.309637 |
| A3KMP2 | Ttc38 | 2.728832 | 2.577323 |
| Q149C2 | Traf3ip1 | 2.695865 | 2.925821 |
| A0A7H0DN76 | OPG104 | 2.672879 | 3.389353 |
| Q9D8X1 | Cutc | 2.671334 | 2.406378 |
| Q5RL51 | Gstcd | 2.665286 | 3.03332 |
| P05213 | Tuba1b | 2.656855 | 2.06046 |
| Q68FE2 | Atg9a | 2.653491 | 4.813513 |
| Q059Y8 | Dcst1 | 2.65336 | 3.994181 |
| Q9CQA9 | Ntpcr | 2.651753 | 3.992351 |
| Q9CQE0 | Rnf138 | 2.637706 | 2.029424 |
| Q7TPD6 | Raver2 | 2.629301 | 3.127994 |
| M1KJ15 | OPG114 | 2.592256 | 5.14629 |
| P24549 | Aldh1a1 | 2.590288 | 3.481767 |
| Q64442 | Sord | 2.582783 | 2.232587 |
| P97931 | Ung | 2.578368 | 4.772914 |
| Q91VN1 | Znf24 | 2.572122 | 3.372488 |
| Q7TPM6 | Fsd1 | 2.55194 | 2.891798 |
| Q91W43 | Gldc | 2.53225 | 3.365639 |
| P09066 | En2 | 2.528133 | 2.925956 |
| P49813 | Tmod1 | 2.524903 | 2.568541 |
| Q80SY4 | Mib1 | 2.506097 | 3.176796 |
| O88477 | Igf2bp1 | 2.505635 | 3.509951 |
| P15105 | Glul | 2.458056 | 5.485443 |
| Q9CYT6 | Cap2 | 2.457029 | 3.223383 |
| Q60611 | Satb1 | 2.452812 | 2.137984 |
| P41139 | Id4 | 2.448231 | 4.34572 |
| Q8C8N2 | Scai | 2.439962 | 4.830247 |
| A0A7H0DN78 | OPG106 | 2.438644 | 5.658443 |
| B1AXP6 | Tomm5 | 2.436527 | 3.020075 |
| P68372 | Tubb4b | 2.42513 | 2.780257 |
| P61079 | Ube2d3 | 2.415966 | 3.04073 |
| P27790 | Cenpb | 2.394187 | 3.18225 |
| P48758 | Cbr1 | 2.374321 | 3.751356 |
| O88396 | Grpel2 | 2.373957 | 2.599089 |
| P84075 | Hpca | 2.361953 | 3.542371 |
| P53810 | Pitpna | 2.355412 | 3.321313 |
| Q61699 | Hsph1 | 2.352274 | 2.868133 |
| Q3V0K9 | Pls1 | 2.35064 | 3.596923 |
| M1LBQ5 | OPG115 | 2.339915 | 4.613213 |
| P23475 | Xrcc6 | 2.328978 | 4.534017 |
| Q8VI93 | Oas3 | 2.305663 | 4.399134 |
| P0C605 | Prkg1 | 2.295907 | 2.8654 |
| Q9JKW0 | Arl6ip1 | 2.2907 | 2.034999 |
| A0A7H0DN20 | OPG047 | 2.289916 | 2.724404 |
| P00342 | Ldhc | 2.287547 | 2.446184 |
| Q6P3D0 | Nudt16 | 2.284872 | 2.775681 |
| Q8C196 | Cps1 | 2.282816 | 2.429831 |
| Q8BGD6 | Slc38a9 | 2.271282 | 2.437323 |
| Q99MU3 | Adar | 2.246551 | 4.491523 |
| P05214 | Tuba3a; Tuba3b | 2.231951 | 3.027449 |
| O89106 | Fhit | 2.224008 | 3.271253 |
| P10637 | Mapt | 2.218145 | 2.506974 |
| Q9R0Q6 | Arpc1a | 2.210401 | 4.195681 |
| Q61169 | Gata6 | 2.204351 | 2.377317 |
| P83510 | Tnik | 2.195845 | 3.759733 |
| E9PVD3 | Dchs1 | 2.188523 | 2.036276 |
| B1ARW8 |  | 2.185091 | 2.0462 |
| Q8C7Q4 | Rbm4 | 2.166282 | 5.600914 |
| Q9DB50 | Ap1s2 | 2.159019 | 2.687924 |
| P61079 | Ube2d3 | 2.156728 | 2.870388 |
| Q32NZ6 | Tmc5 | 2.151 | 2.608333 |
| Q9DBL2 | Gdap2 | 2.150873 | 2.164724 |
| P97367 | Meis2 | 2.147189 | 3.256278 |
| Q8BYH3 | Trmt13 | 2.137006 | 2.272301 |
| Q9CQZ7 | Polr3k | 2.133989 | 2.438246 |
| O70583 | Mid1 | 2.129474 | 3.240257 |
| Q9ERE3 | Sgk3 | 2.109957 | 2.058849 |
| Q61599 | Arhgdib | 2.107361 | 5.14629 |
| A0A7H0DNC4 | OPG153 | 2.095312 | 4.218376 |
| A0A7H0DNC1 | OPG149 | 2.073696 | 4.450296 |
| M1L543 | OPG138 | 2.058594 | 4.166112 |
| A0A7H0DN17 | OPG044 | 2.053263 | 3.667684 |
| Q8CB27 | Yod1 | 2.044334 | 4.586399 |
| Q8BUL6 | Plekha1 | 2.04413 | 2.341231 |
| Q9CQ02 | Commd4 | 2.031689 | 2.593166 |
| P0C027 | Nudt10 | 2.006578 | 2.007662 |
| Q9CPN8 | Igf2bp3 | 1.997294 | 4.199705 |
| P60521 | Gabarapl2 | 1.984717 | 4.568429 |
| Q64512 | Ptpn13 | 1.982118 | 2.157283 |
| O08580 | Esrra | 1.98208 | 3.640033 |
| Q9D7X8 | Ggct | 1.979433 | 5.124298 |
| A0A7H0DN80 | OPG108 | 1.962902 | 4.129593 |
| A0A7H0DN89 | OPG117 | 1.956833 | 5.364449 |
| Q9Z191 | Eya4 | 1.953606 | 3.263889 |
| P07742 | Rrm1 | 1.934922 | 3.529919 |
| Q9CWF2 | Tubb2b | 1.928833 | 3.125568 |
| A0A7H0DNE6 | OPG180 | 1.917933 | 4.361588 |
| A0A7H0DN43 | OPG070 | 1.914382 | 4.907671 |
| Q80W88 | Homez | 1.875923 | 2.841458 |
| Q8JZS0 | Lin7a | 1.867968 | 2.742328 |
| Q62420 | Sh3gl2 | 1.863356 | 3.236515 |
| A0A7H0DN35 | OPG062 | 1.8565 | 4.236364 |
| Q8BT51 | COA4 | 1.849835 | 3.445112 |
| P0DTN1 | OPG139 | 1.844975 | 4.606925 |
| Q8V4Y0 | OPG105 | 1.842172 | 3.538393 |
| Q9QYB8 | Add2 | 1.831312 | 2.054483 |
| Q8BYJ6 | Tbc1d4 | 1.828415 | 2.564538 |
| Q925B0 | Pawr | 1.827807 | 4.617016 |
| A0A7H0DN27 | OPG054 | 1.827618 | 4.543558 |
| Q5SSL4 | Abr | 1.821625 | 2.274902 |
| P62855 | Rps26 | 1.818925 | 2.41334 |
| P11103 | Parp1 | 1.803233 | 3.79061 |
| Q8R001 | Mapre2 | 1.792585 | 4.785385 |
| A0A7H0DNB4 | OPG142 | 1.792438 | 2.653447 |
| M1L9M3 | OPG087 | 1.790087 | 4.358855 |
| P47964 | Rpl36 | 1.769205 | 2.208909 |
| A0A7H0DNC8 | OPG157 | 1.769046 | 2.945541 |
| A0A7H0DN46 | OPG073 | 1.75618 | 3.538891 |
| Q61831 | Mapk10 | 1.755308 | 2.092381 |
| A0A7H0DN91 | OPG119 | 1.737161 | 3.191053 |
| A0A7H0DND2 | OPG161 | 1.72736 | 3.837175 |
| P60824 | Cirbp | 1.720495 | 4.092282 |
| Q9CR64 | Tmem167a | 1.718908 | 2.711408 |
| Q9QY15 | Ddx25 | 1.711255 | 2.08367 |
| Q8CEZ0 | Kctd2 | 1.702712 | 2.385758 |
| A0A7H0DN41 | OPG068 | 1.702277 | 5.15546 |
| P62305 | Snrpe | 1.695599 | 4.060261 |
| A0A7H0DN72 | OPG100 | 1.673559 | 4.022908 |
| Q9D6T1 | Tube1 | 1.671466 | 2.364902 |
| O35984 | Pbx2 | 1.66985 | 2.391972 |
| Q61474 | Msi1 | 1.653761 | 3.761629 |
| Q9WV02 | Rbmx | 1.653709 | 2.161531 |
| Q9JKL4 | Ndufaf3 | 1.637649 | 2.831906 |
| Q03173 | Enah | 1.62243 | 4.48238 |
| P52482 | Ube2e1 | 1.615182 | 2.543112 |
| Q9Z129 | Recql | 1.603975 | 4.043889 |
| M1L511 | OPG098 | 1.596626 | 4.58826 |
| Q9DB07 | Ift46 | 1.580972 | 2.127535 |
| Q3TAA7 | Stk11ip | 1.574428 | 2.622325 |
| A2AQ07 | Tubb1 | 1.572795 | 3.017807 |
| Q9EQS9 | Igdcc4 | 1.570627 | 3.780173 |
| P62137 | Ppp1ca | 1.569028 | 3.04594 |
| A0A7H0DN74 | OPG102 | 1.562372 | 4.492632 |
| A0A7H0DN56 | OPG084 | 1.561718 | 3.346807 |
| Q6ZWN5 | Rps9 | 1.560434 | 2.829743 |
| A0A7H0DN48 | OPG075 | 1.55784 | 3.307307 |
| Q78IS1 | Tmed3 | 1.556622 | 2.119972 |
| A0A7H0DNA4 | OPG132 | 1.552427 | 4.194378 |
| Q61233 | Lcp1 | 1.550247 | 4.562169 |
| M1L502 | OPG088 | 1.544585 | 3.508306 |
| A0A7H0DNF4 | OPG192 | 1.541092 | 3.538393 |
| A0A7H0DN57 | OPG085 | 1.540605 | 4.036375 |
| A0A7H0DN79 | OPG107 | 1.521972 | 4.086829 |
| Q9D032 | Ssbp3 | 1.519681 | 3.56678 |
| Q9JJV2 | Pfn2 | 1.515629 | 3.958728 |
| A0A7H0DN42 | OPG069 | 1.511408 | 4.479171 |
| Q8BGS2 | Bola2 | 1.503543 | 5.43806 |
| Q8C0D0 | Trub1 | 1.499044 | 2.74541 |
| Q9CQF6 | Aasdhppt | 1.49631 | 2.719894 |
| Q8BGV8 | Mief1 | 1.482235 | 2.725964 |
| Q8BPK2 | Zcchc3 | 1.481189 | 2.932835 |
| Q8CCA0 | Dcun1d4 | 1.472219 | 3.56678 |
| Q05186 | Rcn1 | 1.470135 | 4.082765 |
| M1LLA2 | OPG126 | 1.465221 | 4.689457 |
| Q80V62 | Fancd2 | 1.449604 | 3.778359 |
| P0DTN3 | OPG154 | 1.449459 | 5.165197 |
| A0A7H0DN81 | OPG109 | 1.44253 | 3.824686 |
| Q9D0B0 | Srsf9 | 1.440625 | 4.143111 |
| Q8VIM9 | Irgq | 1.435042 | 3.777105 |
| Q8BJZ4 | Mrps35 | 1.433154 | 3.191521 |
| A0A7H0DNA8 | OPG136 | 1.430688 | 4.206023 |
| P27659 | Rpl3 | 1.42405 | 3.133124 |
| Q91VL8 | Terf2ip | 1.405033 | 4.11568 |
| Q924Z6 | Xpo6 | 1.399814 | 3.545577 |
| A0A7H0DNB2 | OPG140 | 1.390134 | 2.056107 |
| O88477 | Igf2bp1 | 1.388739 | 5.699939 |
| Q9Z130 | Hnrnpdl | 1.388116 | 4.910968 |
| A0A7H0DN69 | OPG097 | 1.384888 | 3.260183 |
| Q66JV4 | Rbm12b2 | 1.384249 | 3.329281 |
| Q9CQ89 | Cuta | 1.38159 | 3.77331 |
| Q9Z2Z9 | Gfpt2 | 1.378467 | 2.018445 |
| A0A7H0DNB8 | OPG146 | 1.377849 | 3.428979 |
| A0A7H0DN45 | OPG072 | 1.377007 | 2.127303 |
| P97855 | G3bp1 | 1.375413 | 2.325309 |
| O70546 | Kdm6a | 1.367118 | 2.994473 |
| Q9D273 | Mmab | 1.366746 | 3.793124 |
| Q3V0K9 | Pls1 | 1.362055 | 3.66225 |
| A0A7H0DNA5 | OPG133 | 1.357004 | 4.197532 |
| M1KJ27 | OPG129 | 1.344965 | 3.761868 |
| Q04841 | Mpg | 1.341525 | 2.38588 |
| P15864 | H1-2 | 1.340999 | 2.78295 |
| Q5SU73 | Coil | 1.340486 | 5.653371 |
| Q62431 | Arid3a | 1.335534 | 2.314016 |
| A0A7H0DNE3 | OPG175 | 1.332153 | 3.53831 |
| M1L9Q3 | OPG137 | 1.327632 | 3.18215 |
| Q8R123 | Flad1 | 1.326136 | 4.092505 |
| Q80UM3 | Naa15 | 1.31107 | 2.379586 |
| Q99K51 | Pls3 | 1.311032 | 5.693764 |
| Q8C7Q4 | Rbm4 | 1.306112 | 4.036329 |
| Q9D9H8 |  | 1.304651 | 2.289898 |
| Q08122 | Tle3 | 1.299744 | 4.983918 |
| Q8K0Z7 | Taco1 | 1.299404 | 3.288545 |
| A0A7H0DN97 | OPG125 | 1.295654 | 4.041025 |
| Q9D7S7 | Rpl22l1 | 1.295483 | 3.926334 |
| A0A7H0DNC0 | OPG148 | 1.28672 | 3.664623 |
| A0A7H0DN96 | OPG124 | 1.285783 | 4.321175 |
| P08003 | Pdia4 | 1.284997 | 2.630186 |
| Q922B1 | Macrod1 | 1.284698 | 3.441553 |
| Q8VI24 | Satb2 | 1.280254 | 3.063354 |
| Q3U0V1 | Khsrp | 1.276334 | 2.511198 |
| Q61189 | Clns1a | 1.262215 | 3.295499 |
| P97364 | Sephs2 | 1.260208 | 5.132566 |
| A0A7H0DN15 | OPG042 | 1.256005 | 3.635948 |
| Q9CZT4 | Polr3e | 1.253952 | 3.048308 |
| Q8BHN1 | Txlng | 1.251661 | 4.167868 |
| A0A7H0DNB7 | OPG145 | 1.251514 | 4.831193 |
| P48722 | Hspa4l | 1.251123 | 2.509651 |
| M1LBP0 | OPG099 | 1.242071 | 2.234076 |
| Q9Z204 | Hnrnpc | 1.237494 | 4.224054 |
| A0A7H0DN37 | OPG064 | 1.230469 | 3.572488 |
| Q8BFY6 | Pef1 | 1.225354 | 3.767177 |
| Q9D1F3 | Eola1 | 1.221902 | 2.071317 |
| P56812 | Pdcd5 | 1.210926 | 4.478714 |
| A0A7H0DN95 | OPG123 | 1.209175 | 4.410573 |
| A0A7H0DNC3 | OPG151 | 1.208435 | 3.949559 |
| A0A7H0DN77 | OPG105 | 1.20048 | 3.789676 |
| P56671 | Maz | 1.195339 | 2.738524 |
| Q6PE54 | Dhx40 | 1.195307 | 4.48238 |
| Q9QY93 | Dctpp1 | 1.193803 | 3.961951 |
| Q3TC72 | Fahd2a | 1.193585 | 2.799392 |
| A2ATU0 | Dhtkd1 | 1.192637 | 2.670259 |
| Q91WD1 | Polr3d | 1.186498 | 4.126846 |
| O70456 | Sfn | 1.186432 | 2.819298 |
| Q05816 | Fabp5 | 1.1854 | 3.302179 |
| Q9Z1X4 | Ilf3 | 1.180739 | 3.999131 |
| Q9JL70 | Fanca | 1.178859 | 2.576774 |
| Q9QXK3 | Copg2 | 1.176773 | 2.827398 |
| O55131 | Septin7 | 1.170943 | 2.087489 |
| Q920Q6 | Msi2 | 1.169754 | 5.564441 |
| Q9ERA0 | Tfcp2 | 1.168857 | 2.874392 |
| Q9CYR0 | Ssbp1 | 1.166448 | 2.128095 |
| Q9D6M3 | Slc25a22 | 1.16409 | 2.201157 |
| Q8BH55 | Thnsl1 | 1.161399 | 3.072581 |
| Q6DID3 | Scaf8 | 1.146588 | 2.287438 |
| A0A7H0DN84 | OPG112 | 1.139214 | 2.658391 |
| A0A7H0DND1 | OPG160 | 1.137472 | 3.035139 |
| Q8BMJ3 | Eif1ax | 1.136293 | 2.787009 |
| P11930 | Nudt19 | 1.126341 | 2.416371 |
| Q9EST4 | Psmg2 | 1.124489 | 2.077692 |
| Q08122 | Tle3 | 1.110577 | 4.211429 |
| Q9CXU9 | Eif1b | 1.109342 | 2.622291 |
| A0A7H0DND9 | OPG171 | 1.105783 | 3.101353 |
| Q3V0K9 | Pls1 | 1.101994 | 4.031829 |
| Q6PCN7 | Hltf | 1.093235 | 2.971823 |
| Q9CXY6 | Ilf2 | 1.086761 | 5.150538 |
| Q2TPA8 | Hsdl2 | 1.085873 | 4.117235 |
| P59048 | Pdrg1 | 1.083824 | 3.650531 |
| Q45VK7 | Dync2h1 | 1.083011 | 3.155214 |
| Q9DD18 | Dtd1 | 1.081618 | 2.016432 |
| A0A7H0DN36 | OPG063 | 1.076286 | 3.676867 |
| A0A7H0DN25 | OPG052 | 1.074706 | 3.752342 |
| Q6DG52 | Churc1 | 1.069802 | 3.304737 |
| P62141 | Ppp1cb | 1.068164 | 3.288392 |
| A0A7H0DN23 | OPG050 | 1.065552 | 3.477624 |
| Q9ERI6 | Rdh14 | 1.045211 | 2.183679 |
| Q62440 | Tle1 | 1.043875 | 4.303897 |
| Q8K4F6 | Nsun5 | 1.041835 | 2.300399 |
| Q6PER3 | Mapre3 | 1.039562 | 2.736839 |
| A0A7H0DN12 | OPG039 | 1.036057 | 4.36404 |
| P35922 | Fmr1 | 1.032777 | 2.02638 |
| A0A7H0DN49 | OPG077 | 1.031611 | 3.4702 |
| A0A7H0DNA2 | OPG130 | 1.031405 | 3.065102 |
| A0A7H0DN10 | OPG037 | 1.030902 | 2.963174 |
| Q811J3 | Ireb2 | 1.030803 | 4.073272 |
| Q60668 | Hnrnpd | 1.028171 | 4.22989 |
| A0A7H0DND0 | OPG159 | 1.027061 | 4.22819 |
| Q8BIP0 | Dars2 | 1.026264 | 3.333671 |
| Q99J10 | Ctu1 | 1.020301 | 2.049997 |
| P56391 | Cox6b1 | 1.019573 | 2.162872 |
| A0A7H0DNA3 | OPG131 | 1.012194 | 3.860284 |
| Q8C167 | Prepl | 1.01013 | 3.028866 |
| Q8VDS4 | Rprd1a | 1.008248 | 4.23341 |
| M1L9M0 | OPG082 | 1.000333 | 3.538393 |
| O08848 | RO60 | 0.998041 | 4.562323 |
| A0A7H0DN39 | OPG066 | 0.996909 | 3.1267 |
| Q99JR1 | Sfxn1 | 0.99595 | 2.688174 |
| Q9D2I5 | Armc9 | 0.993672 | 2.574995 |
| A0A7H0DN85 | OPG113 | 0.990047 | 4.893162 |
| P42225 | Stat1 | 0.988772 | 4.568308 |
| Q9JJI8 | Rpl38 | 0.98458 | 2.213998 |
| Q8C2P3 | Dus1l | 0.982081 | 2.628929 |
| Q64261 | Cdk6 | 0.979631 | 4.799609 |
| Q8VDM6 | Hnrnpul1 | 0.975066 | 4.95321 |
| Q8BI84 | Mia3 | 0.97359 | 2.421512 |
| Q9ET01 | Pygl | 0.969742 | 2.868133 |
| Q3ULD5 | Mccc2 | 0.968399 | 3.787692 |
| Q8R2U4 | Ntmt1 | 0.966014 | 4.920504 |
| A0A7H0DN90 | OPG118 | 0.96326 | 3.354687 |
| Q6NSQ7 | Ltv1 | 0.961785 | 3.949559 |
| Q9R0D8 | Wdr54 | 0.948451 | 2.325057 |
| M1LL92 | OPG116 | 0.947553 | 3.69578 |
| P07742 | Rrm1 | 0.947549 | 4.371411 |
| Q9CQV6 | Map1lc3b | 0.943273 | 4.037387 |
| Q6PD24 | Ankrd13d | 0.937949 | 2.094241 |
| Q3SXD3 | Hddc2 | 0.936107 | 3.345121 |
| Q9CR09 | Ufc1 | 0.934277 | 2.863501 |
| Q9CWW6 | Pin4 | 0.933947 | 3.608801 |
| P20108 | Prdx3 | 0.933084 | 4.440791 |
| Q60649 | Clpb | 0.932456 | 4.429022 |
| Q8VEJ9 | Vps4a | 0.921435 | 2.544397 |
| Q9QZX7 | Srr | 0.917585 | 2.010432 |
| P59470 | Polr3b | 0.912515 | 3.393746 |
| Q9CPX6 | Atg3 | 0.912487 | 3.289529 |
| Q3TCJ1 | Abraxas2 | 0.901506 | 3.340519 |
| Q9CWQ0 | Dph5 | 0.900301 | 3.0481 |
| Q9ESZ8 | Gtf2i | 0.892602 | 4.198785 |
| P61290 | Psme3 | 0.890394 | 4.804916 |
| A0A7H0DN05 | OPG031 | 0.890307 | 2.433877 |
| P70698 | Ctps1 | 0.887899 | 2.417569 |
| Q9CXS4 | Cenpv | 0.887135 | 2.979217 |
| Q9D4V7 | Rabl3 | 0.88672 | 2.571749 |
| Q8VDW0 | Ddx39a | 0.886459 | 2.295986 |
| Q99LG4 | Ttc5 | 0.880503 | 3.015811 |
| Q8VDC0 | Lars2 | 0.876996 | 2.347477 |
| Q7TPQ3 | Shprh | 0.876691 | 3.036087 |
| Q64331 | Myo6 | 0.876512 | 3.53188 |
| Q8BH65 | Dennd6a | 0.875412 | 3.069987 |
| A2CG63 | Arid4b | 0.874933 | 2.394751 |
| A0A7H0DNH0 | OPG003 | 0.868856 | 3.446552 |
| O35613 | Daxx | 0.867863 | 3.021723 |
| Q61823 | Pdcd4 | 0.867277 | 2.583287 |
| Q91V64 | Isoc1 | 0.864926 | 4.166066 |
| A0A7H0DNC7 | OPG156 | 0.862823 | 2.902927 |
| P70280 | Vamp7 | 0.86055 | 2.441059 |
| Q9D6T0 | Nosip | 0.84778 | 3.316161 |
| Q8K2F8 | Lsm14a | 0.847027 | 4.366802 |
| Q9JK38 | Gnpnat1 | 0.844485 | 5.466033 |
| Q3U2A8 | Vars2 | 0.844481 | 2.598826 |
| Q8BFR5 | Tufm | 0.842448 | 5.430156 |
| Q8CA72 | Gan | 0.842309 | 3.557748 |
| Q7TSH6 | Scaf4 | 0.841109 | 2.800109 |
| Q8BP67 | Rpl24 | 0.837087 | 2.523489 |
| P70697 | Urod | 0.83186 | 3.456865 |
| Q8R4X3 | Rbm12 | 0.829688 | 3.917069 |
| Q9CXJ1 | Ears2 | 0.829068 | 2.536509 |
| Q9JJT0 | Rcl1 | 0.827345 | 3.859937 |
| Q9JI11 | Stk4 | 0.824538 | 3.241831 |
| Q99K46 | Usp11 | 0.824537 | 3.588324 |
| Q8VE80 | Thoc3 | 0.824532 | 2.91991 |
| Q6NVF0 | Ocrl | 0.8178 | 3.825791 |
| Q64523 | H2ac20 | 0.816487 | 2.313822 |
| Q9D880 | Timm50 | 0.815535 | 2.224733 |
| Q8BUH1 | Txnl4b | 0.812022 | 3.294256 |
| A0A7H0DN44 | OPG071 | 0.808817 | 3.879274 |
| D3YXK2 | Safb | 0.806519 | 2.568541 |
| Q9WUD8 | Faim | 0.801796 | 3.550948 |
| Q9QXK3 | Copg2 | 0.800843 | 5.456448 |
| Q8C5Q4 | Grsf1 | 0.799522 | 2.876478 |
| P68372 | Tubb4b | 0.793285 | 2.347542 |
| O88329 | Myo1a | 0.790613 | 2.980015 |
| Q9Z2Y3 | Homer1 | 0.785955 | 2.918782 |
| Q9WUR2 | Eci2 | 0.784046 | 3.082601 |
| O55060 | Tpmt | 0.781062 | 2.144828 |
| Q8K368 | Fanci | 0.772021 | 2.114205 |
| Q8BY02 | Nkrf | 0.762025 | 3.046147 |
| Q8K126 | Mtrf1 | 0.761946 | 2.354586 |
| B7ZMP1 | Xpnpep3 | 0.761408 | 2.946333 |
| P50136 | Bckdha | 0.759253 | 3.992351 |
| Q6NZP2 | Gpbp1l1 | 0.759141 | 3.24787 |
| Q9DCN1 | Nudt12 | 0.757331 | 2.372545 |
| Q80ZI6 | Lrsam1 | 0.749369 | 2.793172 |
| A0A7H0DN19 | OPG046 | 0.747348 | 2.57878 |
| Q9Z0E0 | Ncdn | 0.743754 | 3.054347 |
| O54998 | Fkbp7 | 0.738845 | 2.191987 |
| Q9CQI6 | Cotl1 | 0.738411 | 2.833948 |
| O89001 | Cpd | 0.737082 | 2.456643 |
| P47738 | Aldh2 | 0.7368 | 2.963673 |
| Q8BT60 | Cpne3 | 0.735201 | 2.506715 |
| Q91V81 | Rbm42 | 0.733026 | 2.507259 |
| Q9CY94 | Gins3 | 0.732429 | 3.223218 |
| Q8K1R3 | Pnpt1 | 0.731607 | 4.95321 |
| Q8BZ36 | Rint1 | 0.72315 | 2.827894 |
| O70152 | Dpm1 | 0.722853 | 3.183466 |
| Q8BGC0 | Htatsf1 | 0.721427 | 3.694892 |
| Q91WQ3 | Yars1 | 0.720446 | 3.802717 |
| Q9DCV4 | Rmdn1 | 0.712311 | 2.12339 |
| P0DTN4 | OPG035 | 0.712137 | 3.163753 |
| Q11011 | Npepps | 0.710893 | 3.459306 |
| Q9Z2X2 | Psmd10 | 0.710124 | 4.03583 |
| Q7TMM9 | Tubb2a | 0.708108 | 2.232255 |
| Q6P5D3 | Dhx57 | 0.70763 | 2.628929 |
| Q9CQ36 | Pole4 | 0.706073 | 3.219352 |
| Q5ND52 | Mrm3 | 0.704485 | 3.224466 |
| Q8R2U6 | Nudt4 | 0.703997 | 3.342839 |
| Q8BG94 | Commd7 | 0.703126 | 2.410829 |
| Q501J6 | Ddx17 | 0.703051 | 4.814116 |
| Q99K48 | Nono | 0.702085 | 2.963174 |
| Q9D2N9 | Vps33a | 0.691941 | 4.046554 |
| Q8R3D1 | Tbc1d13 | 0.690164 | 3.259062 |
| Q6NZN0 | Rbm26 | 0.689723 | 3.693186 |
| P53798 | Fdft1 | 0.687148 | 2.904295 |
| Q8QZS1 | Hibch | 0.687056 | 2.930694 |
| Q6PGA0 | Rcor3 | 0.684846 | 2.530183 |
| Q9CXG3 | Ppil4 | 0.683805 | 4.450425 |
| P0DTN2 | OPG190 | 0.683164 | 2.04783 |
| Q8VE37 | Rcc1 | 0.68184 | 4.775798 |
| O35737 | Hnrnph1 | 0.680638 | 3.526787 |
| Q6BCL1 | Pram1 | 0.67953 | 2.234076 |
| Q9R0P9 | Uchl1 | 0.670633 | 3.612317 |
| Q9D032 | Ssbp3 | 0.669465 | 2.140495 |
| P62862 | Fau | 0.667829 | 2.516575 |
| Q9DCT2 | Ndufs3 | 0.666762 | 2.979655 |
| Q80W37 | Snupn | 0.664565 | 3.493421 |
| O35638 | Stag2 | 0.662178 | 3.697294 |
| Q9ESE1 | Lrba | 0.655765 | 4.139668 |
| Q80U78 | Pum1 | 0.655352 | 3.386567 |
| Q9R0P4 | Smap | 0.652858 | 3.92942 |
| Q921X6 | Polr3f | 0.652551 | 2.979217 |
| Q8R2R9 | Ap3m2 | 0.651689 | 2.432551 |
| Q8VDI7 | Ubac1 | 0.651617 | 2.76499 |
| Q9QXV1 | Cbx8 | 0.647669 | 2.710081 |
| Q8BWF0 | Aldh5a1 | 0.643391 | 2.799269 |
| Q3UFY8 | Trmt10c | 0.642938 | 2.894937 |
| Q9D2M8 | Ube2v2 | 0.641389 | 2.946631 |
| Q8VE97 | Srsf4 | 0.641005 | 2.662783 |
| Q8VE92 | Rbm4b | 0.639114 | 2.380692 |
| Q3UMY5 | Eml4 | 0.636064 | 4.043889 |
| Q9DCL4 | Mettl15 | 0.631139 | 2.597181 |
| Q8CG65 | Sspo | 0.627933 | 2.854506 |
| O08663 | Metap2 | 0.62654 | 4.223066 |
| Q6PB93 | Galnt2 | 0.623393 | 2.220319 |
| Q9WUV0 | Orc5 | 0.62275 | 2.89786 |
| Q91WJ8 | Fubp1 | 0.622433 | 4.641726 |
| Q8BH60 | Gopc | 0.621805 | 3.370075 |
| Q3UIA2 | Arhgap17 | 0.619942 | 3.133124 |
| P48774 | Gstm5 | 0.619562 | 2.712899 |
| Q8R088 | Golph3l | 0.61193 | 3.02218 |
| P62317 | Snrpd2 | 0.611103 | 3.282346 |
| Q9D903 | Ebna1bp2 | 0.61048 | 2.489953 |
| P00493 | Hprt1 | 0.607543 | 3.917594 |
| A0A7H0DNG7 | OPG005 | 0.607104 | 2.773379 |
| Q8K310 | Matr3 | 0.603549 | 4.209527 |
| Q9QY36 | Naa10 | 0.603069 | 2.556402 |
| Q9CPQ3 | Tomm22 | 0.602551 | 2.250282 |
| Q9CPS7 | Pno1 | 0.601458 | 4.092282 |
| P81117 | Nucb2 | 0.601112 | 4.152355 |
| Q9CYR6 | Pgm3 | 0.600936 | 3.350089 |
| P61082 | Ube2m | 0.598686 | 4.230572 |
| Q7TNC4 | Luc7l2 | 0.59729 | 4.543558 |
| Q9JHS3 | Lamtor2 | 0.595625 | 3.538393 |
| Q03958 | Pfdn6 | 0.593242 | 3.242248 |
| Q9DCL9 | Paics | 0.591334 | 3.596923 |
| O54879 | Hmgb3 | 0.589412 | 3.366594 |
| Q8C569 | Fam118b | 0.588756 | 2.75231 |
| Q6PFR5 | Tra2a | 0.588215 | 2.419941 |
| Q99LC8 | Eif2b1 | 0.58683 | 3.057952 |
| Q8CII2 | Cdc123 | 0.586714 | 3.31999 |
| Q3U0K8 | Ogfod1 | 0.585985 | 2.755259 |
| Q8R2Q4 | Gfm2 | 0.584419 | 2.840412 |
| Q9D0N7 | Chaf1b | -0.58003 | 3.087087 |
| Q6ZQL4 | Wdr43 | -0.58084 | 5.276111 |
| O88485 | Dync1i1 | -0.58178 | 2.202369 |
| Q8CIH9 | Ppat | -0.5822 | 3.898668 |
| Q9JKX6 | Nudt5 | -0.58292 | 2.296553 |
| P05627 | Jun | -0.58296 | 2.028692 |
| Q9D8B3 | Chmp4b | -0.58355 | 3.915679 |
| Q8CHT3 | Ints5 | -0.58424 | 3.111517 |
| O70400 | Pdlim1 | -0.58517 | 3.53188 |
| Q923D5 | Wbp11 | -0.58551 | 3.699442 |
| Q9D0I9 | Rars1 | -0.58597 | 3.59289 |
| P58929 | Gmeb2 | -0.58632 | 2.761952 |
| Q8R2N2 | Utp4 | -0.58634 | 2.918579 |
| P46664 | Adss2 | -0.58738 | 3.430386 |
| Q8K2H2 | Otud6b | -0.58836 | 2.780465 |
| Q9D0F6 | Rfc5 | -0.58899 | 3.5655 |
| Q61768 | Kif5b | -0.59059 | 4.734409 |
| Q91W90 | Txndc5 | -0.59312 | 3.261302 |
| Q8C0P0 | Mastl | -0.59347 | 2.195827 |
| Q80YA3 | Ddhd1 | -0.59349 | 3.182823 |
| Q6PEB6 | Mob4 | -0.59372 | 2.721537 |
| P62960 | Ybx1 | -0.59393 | 3.195204 |
| Q6PHQ8 | Naa35 | -0.5942 | 2.708533 |
| Q9JHU4 | Dync1h1 | -0.59448 | 4.025489 |
| Q8BFP9 | Pdk1 | -0.5946 | 2.962192 |
| P62835 | Rap1a | -0.5951 | 2.276913 |
| O09110 | Map2k3 | -0.59564 | 4.082765 |
| Q9D7M1 | Gid8 | -0.59643 | 3.005118 |
| P63073 | Eif4e | -0.59684 | 3.192667 |
| Q7TSC1 | Prrc2a | -0.59685 | 4.780102 |
| Q8VHR5 | Gatad2b | -0.59736 | 4.283816 |
| Q9WUM4 | Coro1c | -0.59829 | 3.247364 |
| Q9JJU8 | Sh3bgrl | -0.59853 | 3.188729 |
| Q8BTY8 | Scfd2 | -0.59894 | 3.173719 |
| Q5H8C4 | Vps13a | -0.5998 | 2.396646 |
| Q9D1C9 | Rrp7a | -0.60017 | 2.033754 |
| Q9D0F3 | Lman1 | -0.60052 | 2.068971 |
| B2RY56 | Rbm25 | -0.6007 | 4.769522 |
| Q8BYA0 | Tbcd | -0.60136 | 3.572488 |
| Q64737 | Gart | -0.60175 | 4.236364 |
| Q8BHJ9 | Slu7 | -0.60189 | 2.622325 |
| Q9Z2N8 | Actl6a | -0.60192 | 4.429022 |
| Q9D898 | Arpc5l | -0.60223 | 3.339316 |
| Q0VEJ0 | Cep76 | -0.6029 | 2.406378 |
| Q8CFI2 | Cdc34 | -0.60408 | 2.115316 |
| Q61122 | Nab1 | -0.60425 | 2.385143 |
| P83741 | Wnk1 | -0.60499 | 3.235672 |
| A2AGT5 | Ckap5 | -0.60546 | 4.566741 |
| P63158 | Hmgb1 | -0.60572 | 3.644279 |
| Q6NZJ6 | Eif4g1 | -0.60653 | 3.917594 |
| Q8CE33 | Klhl11 | -0.60683 | 3.917594 |
| Q80U72 | Scrib | -0.60734 | 3.187886 |
| F8VQB6 | Myo10 | -0.60743 | 2.537263 |
| Q6URW6 | Myh14 | -0.60745 | 2.835236 |
| Q9R1R2 | Trim3 | -0.60793 | 2.742581 |
| Q8BHK9 | Ercc6l | -0.60803 | 2.458568 |
| P27546 | Map4 | -0.60859 | 3.022857 |
| Q99KH8 | Stk24 | -0.60893 | 2.335984 |
| Q9CZD3 | Gars1 | -0.60918 | 3.514056 |
| Q9Z2X8 | Keap1 | -0.60922 | 3.18618 |
| P99027 | Rplp2 | -0.61049 | 3.890018 |
| P36993 | Ppm1b | -0.61075 | 3.07707 |
| Q9WUB4 | Dctn6 | -0.61098 | 4.907671 |
| Q80Y81 | Elac2 | -0.61128 | 2.231502 |
| P59326 | Ythdf1 | -0.61296 | 2.873418 |
| Q8CI32 | Bag5 | -0.61316 | 3.847362 |
| P70297 | Stam | -0.61345 | 4.052185 |
| P10630 | Eif4a2 | -0.61398 | 3.287627 |
| Q924H7 | Wac | -0.61409 | 3.305044 |
| Q3THK3 | Gtf2f1 | -0.61467 | 3.188729 |
| Q8R2M2 | Dnttip2 | -0.61483 | 2.233778 |
| Q925E7 | Ppp2r2d | -0.61497 | 2.443714 |
| O35218 | Cpsf2 | -0.61507 | 4.920504 |
| Q63829 | Commd3 | -0.61531 | 3.971957 |
| P61202 | Cops2 | -0.61686 | 5.55166 |
| P97496 | Smarcc1 | -0.61734 | 4.110799 |
| Q8BMI3 | Gga3 | -0.61753 | 2.254262 |
| Q9CQ28 | Dph6 | -0.61771 | 2.892791 |
| Q9CZW5 | Tomm70 | -0.61816 | 2.920173 |
| Q9D892 | Itpa | -0.61857 | 4.429212 |
| Q99L27 | Gmpr2 | -0.61909 | 2.528983 |
| Q8R0L9 | Tada3 | -0.61946 | 3.096224 |
| Q8R323 | Rfc3 | -0.61977 | 3.299144 |
| Q60967 | Papss1 | -0.6206 | 4.446099 |
| P35441 | Thbs1 | -0.62082 | 2.406888 |
| P68373 | Tuba1c | -0.621 | 2.594817 |
| Q9WUK4 | Rfc2 | -0.62121 | 2.691397 |
| Q61081 | Cdc37 | -0.62127 | 3.291439 |
| Q9DBR7 | Ppp1r12a | -0.62184 | 2.545095 |
| Q5SV85 | Synrg | -0.62252 | 2.559074 |
| Q9CYG7 | Tomm34 | -0.62371 | 2.563461 |
| P70296 | Pebp1 | -0.62371 | 3.058545 |
| Q64324 | Stxbp2 | -0.624 | 2.783841 |
| P56380 | Nudt2 | -0.62459 | 2.328967 |
| O88967 | Yme1l1 | -0.62464 | 3.015037 |
| Q9Z0R4 | Itsn1 | -0.62824 | 2.898511 |
| O88879 | Apaf1 | -0.62826 | 2.961486 |
| Q8CEC0 | Nup88 | -0.62857 | 4.20026 |
| Q62261 | Sptbn1 | -0.62875 | 4.769522 |
| Q8R015 | Bloc1s5 | -0.6296 | 3.436856 |
| Q99LP6 | Grpel1 | -0.6302 | 4.552875 |
| Q60605 | Myl6 | -0.63032 | 2.821577 |
| Q69ZZ9 | Macf1 | -0.63046 | 5.005524 |
| O54956 | Pole2 | -0.63075 | 2.931122 |
| P20444 | Prkca | -0.63141 | 2.034719 |
| Q76MZ3 | Ppp2r1a | -0.63233 | 4.27151 |
| Q52KI8 | Srrm1 | -0.63234 | 4.358855 |
| Q9D0I8 | Mrto4 | -0.63347 | 2.693622 |
| Q6P5C5 | Smug1 | -0.63358 | 2.122817 |
| P35922 | Fmr1 | -0.63399 | 4.491523 |
| P39054 | Dnm2 | -0.6349 | 3.958173 |
| Q9EQM6 | Dgcr8 | -0.63602 | 3.611091 |
| Q6NZF1 | Zc3h11a | -0.63698 | 4.134784 |
| Q6P542 | Abcf1 | -0.63741 | 3.297778 |
| O88696 | Clpp | -0.6375 | 2.820813 |
| P70175 | Dlg3 | -0.63767 | 3.760566 |
| Q6NZL6 | Tonsl | -0.63784 | 3.548345 |
| P84096 | Rhog | -0.63899 | 2.472778 |
| A0A7H0DN73 | OPG101 | -0.63907 | 3.430598 |
| P97310 | Mcm2 | -0.6391 | 3.7529 |
| Q99LM9 | Tada1 | -0.64001 | 3.464795 |
| Q60996 | Ppp2r5c | -0.64026 | 3.304141 |
| P61087 | Ube2k | -0.64104 | 5.485443 |
| P63260 | Actg1 | -0.64111 | 2.600719 |
| P42230 | Stat5a | -0.64124 | 3.572345 |
| A2ABV5 | Med14 | -0.64215 | 3.031922 |
| Q9JLT4 | Txnrd2 | -0.64219 | 3.118389 |
| P04627 | Araf | -0.6423 | 2.304436 |
| P53762 | Arnt | -0.64332 | 3.745686 |
| P97760 | Polr2c | -0.64454 | 3.064046 |
| P62484 | Abi2 | -0.64477 | 2.818011 |
| P84091 | Ap2m1 | -0.64562 | 2.52916 |
| O09012 | Pex5 | -0.6473 | 4.687421 |
| P15307 | Rel | -0.64808 | 2.755146 |
| P62631 | Eef1a2 | -0.64885 | 3.654045 |
| Q8QZZ8 | Rab38 | -0.64892 | 2.397627 |
| Q62432 | Smad2 | -0.64996 | 2.449154 |
| P10852 | Slc3a2 | -0.65058 | 2.06046 |
| Q62165 | Dag1 | -0.65167 | 3.364062 |
| O35685 | Nudc | -0.65215 | 5.305289 |
| Q78PG9 | Ccdc25 | -0.65276 | 4.027116 |
| Q7TSV4 | Pgm2 | -0.65281 | 5.640145 |
| Q8C6E0 | Cfap36 | -0.65354 | 3.22147 |
| Q8C1B7 | Septin11 | -0.654 | 2.494137 |
| P17426 | Ap2a1 | -0.65419 | 3.261302 |
| Q9R0H0 | Acox1 | -0.65474 | 4.983918 |
| P97393 | Arhgap5 | -0.65517 | 4.040672 |
| Q3TKT4 | Smarca4 | -0.65549 | 4.448369 |
| Q922Y1 | Ubxn1 | -0.65582 | 2.963673 |
| P97822 | Anp32e | -0.65587 | 3.864114 |
| Q8R1Q8 | Dync1li1 | -0.65659 | 4.746578 |
| A8Y5H7 | Sec14l1 | -0.65712 | 2.891917 |
| Q8R4R6 | Nup35 | -0.6572 | 4.532381 |
| B2KF05 | Brpf3 | -0.65792 | 2.396151 |
| Q62189 | Snrpa | -0.65838 | 2.544481 |
| P62075 | Timm13 | -0.65901 | 3.183339 |
| Q9JIH2 | Nup50 | -0.65953 | 3.182812 |
| Q8C0J2 | Atg16l1 | -0.65959 | 2.52272 |
| Q6P9Q4 | Fhod1 | -0.65976 | 2.631703 |
| P54103 | Dnajc2 | -0.66002 | 3.103428 |
| P63085 | Mapk1 | -0.66015 | 3.161061 |
| E9Q6D6 | Znf277 | -0.66046 | 2.57863 |
| P17742 | Ppia | -0.66049 | 3.531279 |
| Q99JX7 | Nxf1 | -0.66124 | 3.392353 |
| P97434 | Mprip | -0.66152 | 3.702231 |
| Q9D1C1 | Ube2c | -0.66152 | 3.860562 |
| Q60838 | Dvl2 | -0.66208 | 2.372798 |
| Q9WU78 | Pdcd6ip | -0.66337 | 4.101987 |
| P05202 | Got2 | -0.66375 | 3.376855 |
| Q64010 | Crk | -0.6655 | 3.353458 |
| Q91YP2 | Nln | -0.66649 | 3.996772 |
| P97473 | Tarbp2 | -0.66666 | 2.126267 |
| Q9WUB3 | Pygm | -0.66693 | 3.274311 |
| Q9QXY9 | Pex3 | -0.66758 | 2.406849 |
| Q9CXF4 | Tbc1d15 | -0.66822 | 4.80299 |
| Q99PT1 | Arhgdia | -0.66832 | 3.477624 |
| Q9D8Y0 | Efhd2 | -0.66858 | 3.926334 |
| P97366 | Evi5 | -0.66911 | 2.877532 |
| P62077 | Timm8b | -0.66925 | 3.536629 |
| Q61464 | Znf638 | -0.66929 | 3.487278 |
| Q9CQ71 | Rpa3 | -0.6696 | 2.299267 |
| Q9EPQ8 | Tcf20 | -0.6698 | 2.092588 |
| Q9QXD8 | Limd1 | -0.67009 | 3.586848 |
| Q9R0P5 | Dstn | -0.67031 | 3.860284 |
| P31938 | Map2k1 | -0.67166 | 3.141566 |
| Q7TPE5 | Slc7a6os | -0.67223 | 3.253938 |
| Q68FF6 | Git1 | -0.67225 | 4.377006 |
| Q9R099 | Tbl2 | -0.67308 | 3.548345 |
| Q9CX34 | Sugt1 | -0.67329 | 5.402248 |
| Q8C2E7 | Washc5 | -0.67371 | 3.123407 |
| Q6ZWM4 | Lsm8 | -0.67379 | 5.214663 |
| Q8BG81 | Poldip3 | -0.67381 | 3.49765 |
| P62331 | Arf6 | -0.67436 | 4.087018 |
| A0A7H0DN16 | OPG043 | -0.67569 | 3.768275 |
| P12815 | Pdcd6 | -0.67619 | 3.937084 |
| P62715 | Ppp2cb | -0.67621 | 3.829583 |
| Q9CWJ9 | Atic | -0.67627 | 3.826167 |
| Q9QXK2 | Rad18 | -0.67628 | 2.57863 |
| Q9ESU6 | Brd4 | -0.67706 | 5.053247 |
| Q8BLR9 | Hif1an | -0.678 | 2.841292 |
| Q5HZJ0 | Drosha | -0.6787 | 2.357242 |
| Q9EPU0 | Upf1 | -0.67915 | 5.274957 |
| Q8K114 | Ints9 | -0.67948 | 2.91316 |
| Q62418 | Dbnl | -0.6797 | 3.720802 |
| Q61941 | Nnt | -0.67976 | 2.095412 |
| Q9QX47 | Son | -0.68071 | 4.297876 |
| Q8CGC4 | Lsm14b | -0.68138 | 3.553055 |
| P68510 | Ywhah | -0.68199 | 4.544375 |
| Q6IRU5 | Cltb | -0.68205 | 3.720802 |
| Q8VD75 | Hip1 | -0.68283 | 2.417473 |
| Q9D8U8 | Snx5 | -0.6838 | 4.566741 |
| Q63810 | Ppp3r1 | -0.68407 | 4.495921 |
| Q3TKT4 | Smarca4 | -0.68574 | 3.220072 |
| P0CG49 | Ubb | -0.68687 | 3.062011 |
| P54729 | Nub1 | -0.68787 | 2.056107 |
| Q9DCD2 | Xab2 | -0.68802 | 4.065891 |
| O55236 | Rngtt | -0.68844 | 2.800752 |
| Q3UFB2 | Znhit6 | -0.68962 | 3.1467 |
| Q9R1K9 | Cetn2 | -0.69107 | 2.111794 |
| O35864 | Cops5 | -0.69137 | 4.84199 |
| P62715 | Ppp2cb | -0.69138 | 4.031829 |
| P61982 | Ywhag | -0.69145 | 4.428592 |
| Q9JLV1 | Bag3 | -0.69147 | 4.585938 |
| P28660 | Nckap1 | -0.69161 | 4.281695 |
| Q9D6J6 | Ndufv2 | -0.69231 | 2.861355 |
| P61161 | Actr2 | -0.69259 | 3.865078 |
| Q9EQG9 | Cert1 | -0.69339 | 4.021535 |
| P49443 | Ppm1a | -0.69355 | 4.617016 |
| P51949 | Mnat1 | -0.69396 | 3.259062 |
| O08915 | Aip | -0.69481 | 3.612944 |
| Q6ZWR4 | Ppp2r2b | -0.69481 | 3.037317 |
| P24547 | Impdh2 | -0.69522 | 3.794059 |
| Q9CQD1 | Rab5a | -0.69552 | 3.023309 |
| P17918 | Pcna | -0.69709 | 3.005118 |
| Q9ERU9 | Ranbp2 | -0.69742 | 5.687571 |
| Q61466 | Smarcd1 | -0.69775 | 2.430133 |
| Q9Z1K5 | Arih1 | -0.69826 | 3.560792 |
| Q6PGH2 | Jpt2 | -0.69927 | 3.155214 |
| P28271 | Aco1 | -0.69934 | 4.430762 |
| Q9CPZ8 | Cmc1 | -0.69935 | 2.0802 |
| Q3UM45 | Ppp1r7 | -0.69938 | 3.877508 |
| A2A5R2 | Arfgef2 | -0.70016 | 2.841361 |
| Q8K2V1 | Ppp4r1 | -0.70069 | 2.861304 |
| Q6P549 | Inppl1 | -0.70091 | 2.893428 |
| Q8K2I1 | Fntb | -0.7012 | 3.992351 |
| Q91YP3 | Dera | -0.7019 | 2.095769 |
| Q9D2G2 | Dlst | -0.70266 | 2.964668 |
| Q8R1A4 | Dock7 | -0.70328 | 4.235088 |
| O88522 | Ikbkg | -0.70388 | 3.302881 |
| P47856 | Gfpt1 | -0.70492 | 4.139668 |
| Q8VEK6 | Ing3 | -0.70499 | 2.400465 |
| Q9CQC8 | Spg21 | -0.70543 | 3.288665 |
| Q8BL66 | Eea1 | -0.70551 | 4.429212 |
| Q80Y17 | Llgl1 | -0.70589 | 2.280788 |
| Q6P4S8 | Ints1 | -0.70618 | 2.94653 |
| Q8VCS0 | Pglyrp2 | -0.70666 | 2.071468 |
| Q61879 | Myh10 | -0.70669 | 5.600914 |
| O54950 | Prkag1 | -0.70735 | 3.216023 |
| Q9Z2U1 | Psma5 | -0.70771 | 3.860284 |
| Q6A026 | Pds5a | -0.70782 | 3.695957 |
| Q63932 | Map2k2 | -0.7093 | 2.226808 |
| O88545 | Cops6 | -0.7097 | 4.126686 |
| Q9JHK4 | Rabggta | -0.70986 | 5.013779 |
| Q6ZWX6 | Eif2s1 | -0.70992 | 5.436405 |
| Q8K0C1 | Ipo13 | -0.71165 | 2.35337 |
| Q61048 | Wbp4 | -0.71175 | 2.464914 |
| Q9JJA7 | Ccnl2 | -0.71232 | 2.172208 |
| Q7TMF3 | Ndufa12 | -0.71248 | 3.237885 |
| Q9Z1R2 | Bag6 | -0.71277 | 4.133493 |
| P25799 | Nfkb1 | -0.71303 | 4.094419 |
| P70362 | Ufd1 | -0.71585 | 3.014946 |
| Q8BTI7 | Ankrd52 | -0.71622 | 3.509197 |
| P54822 | Adsl | -0.71699 | 4.172909 |
| Q99K74 | Med24 | -0.71715 | 3.030769 |
| Q8BMK4 | Ckap4 | -0.71816 | 2.274365 |
| Q9CWM4 | Pfdn1 | -0.72019 | 3.616845 |
| P26231 | Ctnna1 | -0.72044 | 4.843626 |
| P26443 | Glud1 | -0.72072 | 3.940616 |
| Q9WVA4 | Tagln2 | -0.72096 | 3.23782 |
| Q80Y44 | Ddx10 | -0.72097 | 2.715916 |
| Q8R332 | Nup58 | -0.7213 | 4.081175 |
| Q5SNZ0 | Ccdc88a | -0.72146 | 4.031084 |
| Q8VEH6 | Zng1 | -0.7217 | 2.826823 |
| Q6R891 | Ppp1r9b | -0.7227 | 3.717224 |
| Q8BJW6 | Eif2a | -0.7227 | 3.319311 |
| Q9Z0P7 | Sufu | -0.72365 | 2.875063 |
| Q9DC48 | Cdc40 | -0.72458 | 4.428869 |
| A2AWA9 | Rabgap1 | -0.72544 | 5.132566 |
| Q9WTK2 | Cdyl | -0.72551 | 2.82886 |
| Q80U93 | Nup214 | -0.72614 | 3.654341 |
| O55106 | Strn | -0.72832 | 3.860641 |
| Q62276 | Med22 | -0.7285 | 3.407187 |
| Q8BP48 | Metap1 | -0.72866 | 4.213217 |
| P25206 | Mcm3 | -0.72988 | 4.602518 |
| A0A7H0DMZ6 | OPG019 | -0.73098 | 2.871515 |
| Q76MZ3 | Ppp2r1a | -0.73143 | 2.319682 |
| Q8BX57 | Pxk | -0.73188 | 3.551789 |
| Q91XU3 | Pip4k2c | -0.73219 | 3.254547 |
| Q8VCM7 | Fgg | -0.73292 | 2.726452 |
| P59328 | Wdhd1 | -0.73295 | 3.381657 |
| P62869 | Elob | -0.73324 | 3.521279 |
| P62983 | Rps27a | -0.73433 | 2.651578 |
| Q9QZB9 | Dctn5 | -0.73478 | 3.16051 |
| Q91YJ2 | Snx4 | -0.73556 | 3.284331 |
| Q3UHX0 | Nol8 | -0.73557 | 2.693239 |
| Q9D8C6 | Med11 | -0.73617 | 2.650906 |
| Q61771 | Kif3b | -0.73646 | 2.599466 |
| Q8BUK6 | Hook3 | -0.73662 | 4.031829 |
| P62880 | Gnb2 | -0.7378 | 2.325309 |
| Q8VCM8 | Ncln | -0.73878 | 2.179962 |
| P60335 | Pcbp1 | -0.73888 | 4.361346 |
| Q8BGD9 | Eif4b | -0.73905 | 3.379558 |
| Q8R180 | Ero1a | -0.7391 | 2.974913 |
| Q924H2 | Med15 | -0.7391 | 3.307148 |
| Q91Z96 | Bmp2k | -0.73948 | 4.218376 |
| Q4VA53 | Pds5b | -0.73956 | 2.644202 |
| Q99J95 | Cdk9 | -0.73983 | 3.521848 |
| P58462 | Foxp1 | -0.74072 | 2.960923 |
| Q80XP8 | Fam76b | -0.74241 | 2.417006 |
| P62962 | Pfn1 | -0.74273 | 4.35638 |
| Q3TXU5 | Dhps | -0.74338 | 3.62301 |
| O35239 | Ptpn9 | -0.74359 | 2.933049 |
| Q61210 | Arhgef1 | -0.74376 | 3.927802 |
| Q9DBG3 | Ap2b1 | -0.74454 | 3.837274 |
| Q8BYR2 | Lats1 | -0.74481 | 2.210099 |
| Q6NS46 | Pdcd11 | -0.74489 | 2.469267 |
| Q9DCL8 | Ppp1r2 | -0.74626 | 2.707736 |
| Q8BIZ6 | Snip1 | -0.74656 | 2.01442 |
| Q8R480 | Nup85 | -0.74735 | 3.586153 |
| P61406 | Smg6 | -0.74736 | 3.183466 |
| Q9QZQ1 | Afdn | -0.74793 | 4.428505 |
| O09106 | Hdac1 | -0.74879 | 3.731041 |
| Q9JHC9 | Elf2 | -0.74953 | 2.261858 |
| Q3TLH4 | Prrc2c | -0.74988 | 4.210253 |
| Q80UK8 | Ints2 | -0.75055 | 3.573786 |
| P61600 | Naa20 | -0.75113 | 3.642927 |
| Q6ZPE2 | Sbf1 | -0.75182 | 3.59493 |
| Q9D824 | Fip1l1 | -0.75227 | 3.4538 |
| Q9CYI4 | Luc7l | -0.75311 | 3.688585 |
| Q3UM18 | Lsg1 | -0.75314 | 2.781044 |
| Q9WTZ1 | Rnf7 | -0.75328 | 2.253023 |
| Q8K199 | Cmc2 | -0.75363 | 2.014327 |
| P26043 | Rdx | -0.75409 | 4.263849 |
| Q60722 | Tcf4 | -0.75448 | 2.068101 |
| Q923B1 | Dbr1 | -0.7548 | 2.773379 |
| O88895 | Hdac3 | -0.75498 | 4.620493 |
| Q6P5D8 | Smchd1 | -0.75574 | 3.281393 |
| P26450 | Pik3r1 | -0.75579 | 2.528293 |
| Q6PDL0 | Dync1li2 | -0.75617 | 3.864017 |
| Q7TT37 | Elp1 | -0.75619 | 3.542676 |
| Q3V1L4 | Nt5c2 | -0.7563 | 3.080685 |
| Q6ZQ93 | Usp34 | -0.75703 | 3.489271 |
| F8VPZ9 | Bicra | -0.75724 | 2.144828 |
| Q91ZA3 | Pcca | -0.7579 | 4.237734 |
| Q3TKY6 | Cwc27 | -0.75791 | 3.098054 |
| Q8BSQ9 | Pbrm1 | -0.75803 | 3.404227 |
| Q8K2Z4 | Ncapd2 | -0.75901 | 4.620227 |
| P63094 | Gnas | -0.75916 | 3.176295 |
| P16381 | D1Pas1 | -0.7605 | 3.369071 |
| Q6P1F6 | Ppp2r2a | -0.76117 | 2.033906 |
| P24788 | Cdk11b | -0.76147 | 3.853809 |
| Q7TNP2 | Ppp2r1b | -0.76354 | 3.813743 |
| P53994 | Rab2a | -0.76386 | 3.140651 |
| Q7TNV0 | Dek | -0.7647 | 2.909903 |
| Q99JF5 | Mvd | -0.76476 | 2.396646 |
| Q3UJD6 | Usp19 | -0.76578 | 3.794059 |
| Q8CG48 | Smc2 | -0.76654 | 4.029547 |
| Q8BGF7 | Pan2 | -0.76724 | 2.91218 |
| Q99J45 | Nrbp1 | -0.76819 | 3.704372 |
| Q99020 | Hnrnpab | -0.76846 | 3.4538 |
| Q61753 | Phgdh | -0.76848 | 4.349889 |
| P51807 | Dynlt1 | -0.76895 | 3.079859 |
| Q9WV98 | Timm9 | -0.76903 | 2.764765 |
| Q8CI94 | Pygb | -0.76954 | 4.206032 |
| P35283 | Rab12 | -0.76972 | 3.051928 |
| P26638 | Sars1 | -0.7699 | 4.544508 |
| Q9DBR7 | Ppp1r12a | -0.77004 | 5.50729 |
| Q6P1F6 | Ppp2r2a | -0.7702 | 3.504469 |
| Q8CHP5 | Pym1 | -0.77136 | 3.183603 |
| O35945 | Aldh1a7 | -0.77188 | 2.356116 |
| Q8BG15 | Ctdspl2 | -0.77203 | 2.799392 |
| Q9EQH3 | Vps35 | -0.77251 | 3.901746 |
| O88811 | Stam2 | -0.77435 | 3.874665 |
| P28652 | Camk2b | -0.77437 | 2.180021 |
| Q9ET26 | Rnf114 | -0.77459 | 2.903332 |
| Q9EP89 | Lactb | -0.77468 | 2.406378 |
| Q8K1Z0 | Coq9 | -0.77486 | 2.82472 |
| P19096 | Fasn | -0.77489 | 3.564073 |
| Q5SWW4 | Med13 | -0.77523 | 2.411071 |
| O88851 | Rbbp9 | -0.77527 | 3.646797 |
| Q91VT1 | Nsmce2 | -0.7753 | 3.782981 |
| O35075 | Vps26c | -0.77654 | 2.157854 |
| Q99JF8 | Psip1 | -0.77669 | 5.712944 |
| Q9ESX5 | Dkc1 | -0.7768 | 2.42157 |
| Q69ZQ2 | Isy1 | -0.77787 | 2.860485 |
| P35822 | Ptprk | -0.77828 | 2.3955 |
| Q9CXI5 | Manf | -0.77866 | 3.536629 |
| Q6PDQ2 | Chd4 | -0.77939 | 4.236364 |
| Q9JKF1 | Iqgap1 | -0.77976 | 5.088062 |
| Q3UMC0 | Afg2a | -0.77983 | 4.210503 |
| P62627 | Dynlrb1 | -0.78049 | 4.263849 |
| Q00547 | Hmmr | -0.78051 | 3.214976 |
| P62874 | Gnb1 | -0.78147 | 4.496904 |
| P11157 | Rrm2 | -0.78179 | 3.68987 |
| Q9CZH3 | Psmg3 | -0.78238 | 5.456448 |
| Q925J9 | Med1 | -0.78293 | 3.82667 |
| P42208 | Septin2 | -0.7833 | 4.883446 |
| Q80U58 | Pum2 | -0.78391 | 4.217682 |
| Q9EPU4 | Cpsf1 | -0.78476 | 5.04269 |
| Q6PDG5 | Smarcc2 | -0.785 | 4.296661 |
| P53995 | Anapc1 | -0.78505 | 3.281969 |
| Q61316 | Hspa4 | -0.78513 | 4.767056 |
| Q3UHB1 | Nt5dc3 | -0.78619 | 3.866001 |
| Q8BWM0 | Ptges2 | -0.78657 | 4.081175 |
| A0A7H0DNG2 | OPG204 | -0.78671 | 3.946362 |
| P42669 | Pura | -0.78676 | 3.370554 |
| Q8VEH8 | Erlec1 | -0.7868 | 2.827894 |
| Q922M3 | Kctd10 | -0.7872 | 3.597183 |
| Q8K2Q9 | Shtn1 | -0.78747 | 4.399134 |
| Q60605 | Myl6 | -0.78751 | 2.173387 |
| Q9JLQ0 | Cd2ap | -0.78757 | 4.339086 |
| Q8QZX2 | Haus3 | -0.78778 | 3.061106 |
| B0V2N1 | Ptprs | -0.78839 | 2.968893 |
| Q8C5L7 | Rbm34 | -0.78884 | 2.91821 |
| Q9Z179 | Shcbp1 | -0.78979 | 3.320162 |
| Q3TNH5 | Arb2a | -0.78982 | 3.413563 |
| Q8CH02 | Sugp1 | -0.79052 | 3.370824 |
| P62334 | Psmc6 | -0.79117 | 3.891931 |
| Q8BY87 | Usp47 | -0.79121 | 3.50417 |
| Q9Z0P5 | Twf2 | -0.79146 | 3.966421 |
| P97311 | Mcm6 | -0.79205 | 4.288095 |
| Q6P9R2 | Oxsr1 | -0.7922 | 3.003995 |
| Q08879 | Fbln1 | -0.79283 | 3.130793 |
| P40124 | Cap1 | -0.79297 | 4.360802 |
| Q9ESL4 | Map3k20 | -0.79364 | 3.859396 |
| P39447 | Tjp1 | -0.7945 | 4.896101 |
| Q8C0E2 | Vps26b | -0.7945 | 3.865078 |
| P08775 | Polr2a | -0.79465 | 3.596923 |
| Q91W96 | Anapc4 | -0.79509 | 3.837268 |
| P09405 | Ncl | -0.79524 | 4.082303 |
| Q8VDR9 | Dock6 | -0.79546 | 3.865078 |
| P63094 | Gnas | -0.79622 | 3.4538 |
| Q80XE1 | Ric8b | -0.79686 | 3.124139 |
| Q99LI8 | Hgs | -0.79763 | 4.288095 |
| P36916 | Gnl1 | -0.79806 | 3.188756 |
| Q6NZR2 | Msantd2 | -0.79815 | 3.093699 |
| Q8BML9 | Qars1 | -0.79849 | 3.743404 |
| Q61035 | Hars1 | -0.79868 | 4.746578 |
| P38647 | Hspa9 | -0.79882 | 5.12433 |
| P51569 | Gla | -0.79909 | 2.049997 |
| Q8R034 | Anapc13 | -0.7997 | 2.571749 |
| Q80TA6 | Mtmr12 | -0.79992 | 2.567264 |
| Q9Z2A0 | Pdpk1 | -0.80019 | 4.632206 |
| Q8BVU0 | Lrch3 | -0.80052 | 2.872896 |
| Q9R0Q4 | Morf4l2 | -0.8018 | 3.417762 |
| Q8QZS3 | Flcn | -0.80183 | 2.000632 |
| Q80XI4 | Pip4k2b | -0.80205 | 4.769522 |
| Q9CQG2 | Mettl16 | -0.80231 | 3.041777 |
| Q921G7 | Etfdh | -0.80246 | 2.549077 |
| Q8BIH0 | Sap130 | -0.80305 | 2.51362 |
| Q8VCK5 | Klhl20 | -0.80315 | 2.074096 |
| Q9WVR4 | Fxr2 | -0.80354 | 3.541784 |
| Q8BQM4 | Heatr3 | -0.80454 | 3.365587 |
| Q3UL36 | Arglu1 | -0.80503 | 3.674192 |
| E9Q1P8 | Irf2bp2 | -0.80544 | 2.624809 |
| P62737 | Acta2 | -0.80587 | 2.010432 |
| O89050 | Mkln1 | -0.80722 | 3.805119 |
| P49717 | Mcm4 | -0.80797 | 4.745015 |
| Q8R3V5 | Sh3glb2 | -0.80798 | 3.586651 |
| Q9WV68 | Decr2 | -0.80845 | 2.986538 |
| Q9Z2G0 | Fem1b | -0.80934 | 2.724395 |
| A2BH40 | Arid1a | -0.8095 | 3.723037 |
| Q8BG05 | Hnrnpa3 | -0.80967 | 4.920504 |
| Q8BZ47 | Znf609 | -0.81024 | 3.297778 |
| Q3U3W5 | Prmt9 | -0.81181 | 2.649422 |
| Q99KX1 | Mlf2 | -0.81235 | 3.265529 |
| P28741 | Kif3a | -0.81271 | 3.579283 |
| O35326 | Srsf5 | -0.81291 | 3.647032 |
| Q9D1C8 | Vps28 | -0.8131 | 3.194338 |
| O70251 | Eef1b | -0.81378 | 2.971254 |
| Q5F2E8 | Taok1 | -0.81405 | 2.762602 |
| Q99LE6 | Abcf2 | -0.8141 | 3.697503 |
| Q7TMI3 | Uhrf2 | -0.81548 | 3.734227 |
| P28658 | Atxn10 | -0.81559 | 3.965404 |
| Q9R190 | Mta2 | -0.81561 | 4.040564 |
| Q3UFS4 | Gpatch11 | -0.81835 | 2.115316 |
| Q8BTZ4 | Anapc5 | -0.81842 | 4.367003 |
| Q80YV3 | Trrap | -0.81939 | 4.620227 |
| Q6ZWY8 | Tmsb10 | -0.81963 | 3.330957 |
| Q2YDW2 | Msto1 | -0.8197 | 2.804549 |
| P22682 | Cbl | -0.82081 | 3.826167 |
| Q6DFV1 | Ncapg2 | -0.82233 | 2.181464 |
| Q9WV80 | Snx1 | -0.82259 | 3.880922 |
| Q6ZPK0 | Phf21a | -0.82387 | 2.078421 |
| P46467 | Vps4b | -0.82404 | 4.639221 |
| Q9D0J4 | Arl2 | -0.82526 | 2.909329 |
| P43024 | Cox6a1 | -0.82551 | 3.72971 |
| Q9R0E1 | Plod3 | -0.82631 | 3.588216 |
| Q9QZB7 | Actr10 | -0.8273 | 3.872541 |
| P0DP26 | Calm1 | -0.82759 | 3.971957 |
| P40336 | Vps26a | -0.82764 | 4.830247 |
| Q91ZU1 | Asb6 | -0.82781 | 3.130793 |
| Q8CE96 | Trmt6 | -0.82831 | 2.558979 |
| Q9DCJ5 | Ndufa8 | -0.82931 | 4.53754 |
| Q9Z2Y8 | Plpbp | -0.82965 | 4.813513 |
| Q9WV92 | Epb41l3 | -0.82968 | 5.685615 |
| Q3THE2 | Myl12b | -0.83029 | 3.960971 |
| Q4VA53 | Pds5b | -0.83069 | 2.912421 |
| Q6IE82 | Jade3 | -0.83085 | 3.385034 |
| Q99MN1 | Kars1 | -0.83189 | 4.632343 |
| Q8C7D2 | Crbn | -0.83192 | 3.904756 |
| Q9Z0H1 | Wdr46 | -0.83344 | 2.262803 |
| Q61301 | Ctnna2 | -0.83354 | 4.362501 |
| P68404 | Prkcb | -0.83418 | 3.304141 |
| Q922Q4 | Pycr2 | -0.83459 | 3.851665 |
| Q9CY66 | Gar1 | -0.83502 | 2.834949 |
| Q91VM9 | Ppa2 | -0.83506 | 3.341607 |
| Q80T69 | Rsbn1 | -0.83544 | 2.866706 |
| Q8VBX6 | Mpdz | -0.83564 | 4.939054 |
| Q91Z67 | Srgap2 | -0.83664 | 4.349889 |
| O70310 | Nmt1 | -0.83667 | 5.050161 |
| D3Z4I3 | Rbm24 | -0.83685 | 2.4974 |
| Q91VJ4 | Stk38 | -0.83714 | 3.098054 |
| Q9QUJ7 | Acsl4 | -0.8382 | 4.052185 |
| Q8VE22 | Mrps23 | -0.83834 | 2.735158 |
| P22682 | Cbl | -0.83901 | 2.77943 |
| Q62084 | Ppp1r14b | -0.83925 | 2.816605 |
| Q8BWQ6 | Vps35l | -0.83927 | 3.829044 |
| Q8K4B0 | Mta1 | -0.84004 | 3.131779 |
| A2AF47 | Dock11 | -0.84042 | 4.210503 |
| Q8K4L3 | Svil | -0.84077 | 2.054884 |
| P33611 | Pola2 | -0.84094 | 2.756012 |
| Q8CDM8 | Fhip2a | -0.84139 | 3.698112 |
| Q8CIM8 | Ints4 | -0.84155 | 5.020603 |
| Q8VDJ3 | Hdlbp | -0.8426 | 4.737437 |
| Q9JM13 | Rabgef1 | -0.84261 | 2.474292 |
| Q3TMH2 | Scrn3 | -0.84281 | 3.155148 |
| O89090 | Sp1 | -0.84308 | 2.734524 |
| Q6A028 | Swap70 | -0.84362 | 4.747524 |
| O88447 | Klc1 | -0.84373 | 2.589 |
| Q61249 | Igbp1 | -0.84387 | 2.145969 |
| Q9DBT5 | Ampd2 | -0.84496 | 4.046554 |
| P05132 | Prkaca | -0.84522 | 4.224054 |
| Q9CQ48 | Nudcd2 | -0.84738 | 4.435763 |
| Q8C079 | Strip1 | -0.84805 | 3.733186 |
| Q61598 | Gdi2 | -0.84894 | 4.004121 |
| Q9WVE8 | Pacsin2 | -0.85009 | 3.646797 |
| Q9CQY1 | Atg12 | -0.85022 | 3.859937 |
| Q9JMH6 | Txnrd1 | -0.85079 | 3.586673 |
| O70305 | Atxn2 | -0.85118 | 3.588324 |
| Q91WA1 | Tipin | -0.8512 | 3.625827 |
| Q6P1B1 | Xpnpep1 | -0.85182 | 4.662114 |
| Q9DB16 | Cab39l | -0.85201 | 2.103383 |
| Q9CU65 | Zmym2 | -0.85203 | 3.586673 |
| P60710 | Actb | -0.85282 | 4.327141 |
| Q91WM3 | Rrp9 | -0.85311 | 3.96794 |
| Q921F2 | Tardbp | -0.85405 | 3.759733 |
| Q9Z321 | Top3b | -0.85406 | 3.403744 |
| Q99K28 | Arfgap2 | -0.85477 | 3.795884 |
| Q8BH43 | Wasf2 | -0.85513 | 2.261076 |
| P34152 | Ptk2 | -0.85551 | 4.321175 |
| Q91YE6 | Ipo9 | -0.85714 | 5.005524 |
| Q920D3 | Med28 | -0.85771 | 2.646536 |
| Q05CL8 | Larp7 | -0.85792 | 4.130702 |
| Q7TPD0 | Ints3 | -0.85793 | 4.143075 |
| Q5KU39 | Vps41 | -0.85799 | 2.516546 |
| Q09XV5 | Chd8 | -0.85828 | 2.964092 |
| Q8C5N3 | Cwc22 | -0.85905 | 4.198908 |
| Q01768 | Nme2 | -0.85917 | 3.512531 |
| Q9WUL7 | Arl3 | -0.8594 | 3.23434 |
| Q8BIG4 | Fbxo28 | -0.85995 | 2.852765 |
| Q6PGH1 | Bud31 | -0.8609 | 3.277161 |
| Q8CGI1 | Fam193a | -0.86091 | 2.433764 |
| Q8BGC4 | Ptgr3 | -0.86153 | 2.357966 |
| Q8QZT1 | Acat1 | -0.86182 | 4.187618 |
| Q9D7P6 | Iscu | -0.86242 | 2.82472 |
| P63001 | Rac1 | -0.86282 | 2.513227 |
| P18654 | Rps6ka3 | -0.86311 | 3.114579 |
| Q9D1G2 | Pmvk | -0.86363 | 3.032918 |
| P50396 | Gdi1 | -0.86414 | 4.010949 |
| Q7TMX5 | Shq1 | -0.86432 | 3.254486 |
| O35127 | Grcc10 | -0.86443 | 3.981152 |
| Q61206 | Pafah1b2 | -0.8648 | 4.573764 |
| Q8K400 | Stxbp5 | -0.86532 | 3.44405 |
| E9Q816 | Cyp2w1 | -0.86534 | 3.268648 |
| Q9CXK8 | Nip7 | -0.86668 | 4.023932 |
| Q08297 | Rad51 | -0.86781 | 3.480051 |
| Q9CZR8 | Tsfm | -0.868 | 2.370247 |
| Q9JI13 | Utp3 | -0.86863 | 2.574874 |
| O70480 | Vamp4 | -0.86898 | 3.223218 |
| Q8VDW0 | Ddx39a | -0.86972 | 3.907435 |
| Q8R1F9 | Rpp40 | -0.8704 | 2.979741 |
| Q99JW4 | Lims1 | -0.87204 | 3.538393 |
| Q923W1 | Tgs1 | -0.87402 | 2.582721 |
| O70378 | Emc8 | -0.87463 | 3.019202 |
| Q91XU0 | Wrnip1 | -0.87483 | 3.183603 |
| Q99MR0 | Actl6b | -0.87533 | 2.263252 |
| Q8K2A7 | Ints10 | -0.87684 | 4.491523 |
| O35465 | Fkbp8 | -0.8774 | 2.710927 |
| Q9EQC5 | Scyl1 | -0.87881 | 4.768744 |
| Q9QXZ0 | Macf1 | -0.87887 | 4.067546 |
| P52825 | Cpt2 | -0.87905 | 3.794059 |
| Q8K411 | Pitrm1 | -0.87949 | 4.491523 |
| Q7TSJ6 | Lats2 | -0.87983 | 2.396595 |
| Q99L45 | Eif2s2 | -0.87989 | 5.514186 |
| Q8BK67 | Rcc2 | -0.88016 | 4.360802 |
| P42567 | Eps15 | -0.8802 | 3.892783 |
| Q9CWX4 | Rpusd4 | -0.88236 | 3.733186 |
| Q8BKI2 | Tnrc6b | -0.88277 | 5.595097 |
| Q64012 | Raly | -0.88312 | 3.073743 |
| Q8CCP0 | Nemf | -0.88376 | 2.931595 |
| Q9WUA3 | Pfkp | -0.88398 | 4.543558 |
| O88487 | Dync1i2 | -0.88407 | 4.7909 |
| Q8R0X2 | Cacul1 | -0.88413 | 3.021713 |
| Q9D0D5 | Gtf2e1 | -0.88605 | 3.906514 |
| Q8BND3 | Wdr35 | -0.88667 | 2.91316 |
| Q6ZQ03 | Fnbp4 | -0.88745 | 3.237987 |
| P63147 | Ube2b | -0.88777 | 3.330107 |
| Q9WUU9 | Mcm3ap | -0.88907 | 2.354899 |
| Q8CH25 | Sltm | -0.88955 | 3.288124 |
| Q8BWZ3 | Naa25 | -0.89017 | 3.667684 |
| Q61553 | Fscn1 | -0.89021 | 4.983918 |
| Q9DBY0 | Foxp4 | -0.89131 | 2.727348 |
| Q99JR8 | Smarcd2 | -0.89146 | 4.054579 |
| Q8K296 | Mtmr3 | -0.89225 | 3.31373 |
| Q6PGC1 | Dhx29 | -0.89264 | 2.904025 |
| Q9CXF7 | Chd1l | -0.89272 | 3.366594 |
| Q9Z0H3 | Smarcb1 | -0.89296 | 4.556244 |
| P10126 | Eef1a1 | -0.89319 | 3.956666 |
| P35922 | Fmr1 | -0.89379 | 2.943922 |
| Q61749 | Eif2b4 | -0.89412 | 4.073272 |
| Q8BIW9 | Chtf18 | -0.89491 | 3.970687 |
| P26350 | Ptma | -0.89649 | 3.590737 |
| Q9D2E2 | Toe1 | -0.89652 | 2.263084 |
| Q9WVM1 | Racgap1 | -0.89677 | 2.362112 |
| Q61595 | Ktn1 | -0.89817 | 4.245529 |
| Q9CT10 | Ranbp3 | -0.8986 | 3.51934 |
| Q6QI06 | Rictor | -0.89987 | 2.857343 |
| P49025 | Cit | -0.90028 | 5.658443 |
| Q8VE99 | Vma22 | -0.9012 | 3.023309 |
| P62737 | Acta2 | -0.90161 | 4.2895 |
| Q6A009 | Ltn1 | -0.90228 | 4.812324 |
| P28738 | Kif5c | -0.90246 | 3.032918 |
| Q8VEH3 | Arl8a | -0.90341 | 3.303438 |
| Q99JB8 | Pacsin3 | -0.90598 | 3.520785 |
| Q925H1 | Trps1 | -0.90673 | 2.194543 |
| Q9CQW2 | Arl8b | -0.90749 | 3.999605 |
| P63017 | Hspa8 | -0.90798 | 5.301412 |
| Q91XD2 | Lims2 | -0.908 | 3.743404 |
| Q8VEJ1 | Gpn2 | -0.9084 | 2.903327 |
| Q8C050 | Rps6ka5 | -0.90943 | 3.554151 |
| P51943 | Ccna2 | -0.90989 | 2.225627 |
| Q6P9P6 | Kif11 | -0.91037 | 4.617016 |
| P63005 | Pafah1b1 | -0.91051 | 4.206443 |
| P21278 | Gna11 | -0.91062 | 2.041066 |
| Q68FH0 | Pkp4 | -0.91189 | 2.025357 |
| P46471 | Psmc2 | -0.91235 | 5.570756 |
| Q9CPW4 | Arpc5 | -0.91335 | 3.168085 |
| O35344 | Kpna3 | -0.9134 | 5.485443 |
| P97765 | Wbp2 | -0.91411 | 3.23434 |
| Q3TCH7 | Cul4a | -0.91445 | 4.006196 |
| A2A6A1 | Gpatch8 | -0.91654 | 4.463934 |
| P57780 | Actn4 | -0.91704 | 4.704439 |
| Q8BGS0 | Mak16 | -0.91726 | 4.323231 |
| Q62425 | Ndufa4 | -0.91741 | 2.001871 |
| Q3V300 | Kif22 | -0.91859 | 2.752122 |
| Q4KML4 | Abracl | -0.91888 | 2.44319 |
| Q8CHH9 | Septin8 | -0.9202 | 3.927802 |
| O88990 | Actn3 | -0.92085 | 3.015715 |
| Q80U28 | Madd | -0.92145 | 2.121702 |
| Q9Z2X1 | Hnrnpf | -0.92181 | 4.492632 |
| P17710 | Hk1 | -0.92231 | 4.586399 |
| Q6PAV2 | Herc4 | -0.92232 | 3.961951 |
| P31230 | Aimp1 | -0.92281 | 5.081926 |
| Q9WV60 | Gsk3b | -0.92599 | 4.289603 |
| Q9QZD8 | Slc25a10 | -0.92616 | 2.154248 |
| Q8C1B7 | Septin11 | -0.92677 | 5.685615 |
| P59325 | Eif5 | -0.92727 | 4.949516 |
| Q9DBC3 | Cmtr1 | -0.92785 | 4.59882 |
| P55264 | Adk | -0.92789 | 4.218376 |
| Q9CPX9 | Anapc11 | -0.92818 | 3.383001 |
| A2APV2 | Fmnl2 | -0.92827 | 2.339849 |
| Q9WVA2 | Timm8a1 | -0.92845 | 3.763065 |
| Q9JKX4 | Aatf | -0.9287 | 5.159035 |
| P99029 | Prdx5 | -0.92936 | 3.137708 |
| Q9JHW4 | Eefsec | -0.93197 | 4.632343 |
| Q3UHX2 | Pdap1 | -0.93291 | 4.223066 |
| Q62422 | Ostf1 | -0.93354 | 4.025145 |
| P33609 | Pola1 | -0.93385 | 5.135241 |
| Q99KB8 | Hagh | -0.93503 | 3.935692 |
| Q99K70 | Rragc | -0.93564 | 3.23782 |
| P17879 | Hspa1b | -0.93594 | 3.471056 |
| Q3UHX9 | Spout1 | -0.93689 | 3.015037 |
| P70340 | Smad1 | -0.93882 | 3.489479 |
| P63268 | Actg2 | -0.94002 | 2.427743 |
| P97371 | Psme1 | -0.9402 | 4.56537 |
| P46938 | Yap1 | -0.94147 | 3.19814 |
| A2AGH6 | Med12 | -0.94305 | 4.110799 |
| P24270 | Cat | -0.94347 | 4.716501 |
| Q8BNY6 | Ncs1 | -0.94374 | 3.350089 |
| E9PVB5 | Ttc17 | -0.94411 | 2.521043 |
| Q8BUR3 | Foxj3 | -0.94487 | 2.784734 |
| Q9JI75 | Nqo2 | -0.94555 | 2.800752 |
| O88738 | Birc6 | -0.9458 | 4.469493 |
| Q06185 | Atp5me | -0.94646 | 2.413104 |
| Q8BMJ2 | Lars1 | -0.94648 | 5.301412 |
| P61021 | Rab5b | -0.9473 | 3.455625 |
| P68037 | Ube2l3 | -0.94753 | 4.237734 |
| D3Z7P3 | Gls | -0.94769 | 5.771121 |
| P41209 | Cetn1 | -0.9479 | 2.061191 |
| Q8BGQ7 | Aars1 | -0.94824 | 4.516432 |
| Q00PI9 | Hnrnpul2 | -0.94918 | 3.851794 |
| Q91VY9 | Znf622 | -0.9493 | 4.789252 |
| Q8BKH7 | Mapkap1 | -0.95029 | 2.730796 |
| A0A7H0DNG5 | OPG209 | -0.95175 | 2.326162 |
| Q3THG9 | Aarsd1 | -0.95333 | 3.255275 |
| Q8CI51 | Pdlim5 | -0.95361 | 4.099644 |
| Q61140 | Bcar1 | -0.9541 | 3.860284 |
| O54734 | Ddost | -0.9544 | 3.000797 |
| Q9ES28 | Arhgef7 | -0.95472 | 3.917594 |
| Q7TMK6 | Hook2 | -0.95516 | 2.240185 |
| Q8R060 | Zwilch | -0.95557 | 3.002028 |
| P47809 | Map2k4 | -0.95665 | 4.943917 |
| Q6PGF3 | Med16 | -0.95733 | 3.104372 |
| Q8R0J7 | Vps37b | -0.95813 | 2.524235 |
| P24288 | Bcat1 | -0.96007 | 3.330841 |
| Q71LX4 | Tln2 | -0.96008 | 3.294153 |
| Q61103 | Dpf2 | -0.96139 | 4.361942 |
| O35658 | C1qbp | -0.9619 | 2.423493 |
| O09110 | Map2k3 | -0.96348 | 3.737022 |
| Q61214 | Dyrk1a | -0.96365 | 2.67601 |
| B1AVH7 | Tbc1d2 | -0.96429 | 2.326162 |
| P53564 | Cux1 | -0.96546 | 3.202882 |
| B8ZXI1 | Qtrt2 | -0.96549 | 2.492376 |
| Q3UZ39 | Lrrfip1 | -0.96677 | 3.165716 |
| Q99KK7 | Dpp3 | -0.96741 | 4.643764 |
| Q6WKZ8 | Ubr2 | -0.96805 | 3.257448 |
| P21126 | Ubl4a | -0.96951 | 2.960905 |
| Q91Y86 | Mapk8 | -0.9698 | 3.864114 |
| P97493 | Txn2 | -0.9704 | 3.611091 |
| O88845 | Akap10 | -0.97054 | 3.270948 |
| P62874 | Gnb1 | -0.97086 | 2.714882 |
| Q3UQN2 | Fcho2 | -0.9719 | 4.745015 |
| Q99KV1 | Dnajb11 | -0.97191 | 4.161044 |
| Q9JHU9 | Isyna1 | -0.97305 | 2.926408 |
| Q99K01 | Pdxdc1 | -0.97463 | 4.602518 |
| Q9CQK7 | Rwdd1 | -0.9747 | 3.865078 |
| Q8C7V3 | Utp15 | -0.9749 | 2.686594 |
| P47757 | Capzb | -0.97526 | 3.603623 |
| O88643 | Pak1 | -0.97875 | 4.130589 |
| Q3TDD9 | Ppp1r21 | -0.97975 | 2.629137 |
| Q6ZQK5 | Acap2 | -0.97976 | 3.850564 |
| Q9R0L6 | Pcm1 | -0.98074 | 2.489169 |
| Q9JM76 | Arpc3 | -0.98089 | 3.365029 |
| P30999 | Ctnnd1 | -0.98362 | 4.793758 |
| Q62388 | Atm | -0.98484 | 3.077858 |
| Q9WTL7 | Lypla2 | -0.98555 | 3.78237 |
| B1AVZ0 | Uprt | -0.98671 | 3.748514 |
| Q8VDM4 | Psmd2 | -0.98842 | 4.955928 |
| Q62048 | Pea15 | -0.98845 | 4.86575 |
| Q6TYB5 | Fez2 | -0.98995 | 2.480465 |
| Q8CDG3 | Vcpip1 | -0.99046 | 4.916992 |
| Q9CZ04 | Cops7a | -0.99085 | 3.191053 |
| Q5BLK4 | Tut7 | -0.99106 | 3.608316 |
| P62715 | Ppp2cb | -0.99147 | 3.572673 |
| P58774 | Tpm2 | -0.99153 | 3.560521 |
| Q8CBC7 | Ftsj1 | -0.9917 | 4.883446 |
| O88783 | F5 | -0.99216 | 2.167992 |
| Q61586 | Gpam | -0.9924 | 2.984093 |
| Q8VD75 | Hip1 | -0.99252 | 3.946642 |
| Q03265 | Atp5f1a | -0.99394 | 4.746578 |
| Q922X9 | Prmt7 | -0.99586 | 5.640145 |
| Q3UMG5 | Lrch2 | -0.99599 | 3.90821 |
| P48754 | Brca1 | -0.99615 | 4.363551 |
| P11440 | Cdk1 | -0.99725 | 4.410573 |
| O70494 | Sp3 | -0.99732 | 2.075424 |
| O08674 | Rbpjl | -0.99846 | 3.464251 |
| Q80W54 | Zmpste24 | -0.99977 | 2.628878 |
| E9Q634 | Myo1e | -1.00013 | 3.001532 |
| Q9JMA1 | Usp14 | -1.00056 | 4.883446 |
| Q8CJF7 | Ahctf1 | -1.0007 | 3.457574 |
| P49138 | Mapkapk2 | -1.00148 | 2.636647 |
| P17182 | Eno1 | -1.00215 | 4.141008 |
| Q3TC93 | Hs1bp3 | -1.00297 | 3.18618 |
| Q8BLN5 | Lss | -1.00381 | 2.909903 |
| O88878 | Zfand5 | -1.00395 | 2.090299 |
| Q9ERG2 | Strn3 | -1.00436 | 5.30566 |
| E9Q634 | Myo1e | -1.00488 | 2.375338 |
| P47934 | Crat | -1.00488 | 3.15949 |
| F7BJB9 | Morc3 | -1.00501 | 4.746578 |
| P18653 | Rps6ka1 | -1.00516 | 4.460119 |
| P12849 | Prkar1b | -1.0055 | 2.480289 |
| Q6ZQF0 | Topbp1 | -1.00601 | 3.379827 |
| Q8K2H6 | Anapc10 | -1.00702 | 2.075358 |
| Q8BZR9 | Ncbp3 | -1.00823 | 3.66754 |
| P60670 | Nploc4 | -1.00831 | 4.737437 |
| Q8BMC4 | Nop9 | -1.00898 | 3.737636 |
| Q8CHI8 | Ep400 | -1.01001 | 4.345534 |
| Q8CCI5 | Rybp | -1.01226 | 4.566741 |
| Q922S8 | Kif2c | -1.0126 | 3.432861 |
| Q60710 | Samhd1 | -1.01342 | 4.566741 |
| Q61881 | Mcm7 | -1.01354 | 5.324351 |
| O55222 | Ilk | -1.01518 | 4.847092 |
| P16951 | Atf2 | -1.01538 | 2.814808 |
| P18653 | Rps6ka1 | -1.0161 | 5.174018 |
| Q9CQI3 | Gmfb | -1.01632 | 2.525754 |
| B2RQC6 | Cad | -1.01636 | 4.602518 |
| Q8BHL5 | Elmo2 | -1.01636 | 4.846983 |
| G5E8V9 | Arfip1 | -1.01642 | 4.067546 |
| P18760 | Cfl1 | -1.01673 | 5.305289 |
| P47754 | Capza2 | -1.01774 | 3.335413 |
| Q91W36 | Usp3 | -1.01805 | 2.812813 |
| Q8BPY9 | Fignl1 | -1.01863 | 2.493359 |
| P40142 | Tkt | -1.01919 | 3.440238 |
| Q9JI10 | Stk3 | -1.01955 | 4.651839 |
| Q571I9 | Aldh16a1 | -1.02005 | 4.429212 |
| Q8CFI0 | Nedd4l | -1.02015 | 3.457574 |
| Q8C547 | Heatr5b | -1.02339 | 4.439753 |
| Q8K2C7 | Os9 | -1.02512 | 2.614376 |
| Q8R3L2 | Tcf25 | -1.02899 | 2.727199 |
| Q9D358 | Acp1 | -1.0293 | 5.099297 |
| P61750 | Arf4 | -1.02944 | 3.236766 |
| Q5EG47 | Prkaa1 | -1.0295 | 3.917594 |
| Q80T85 | Dcaf5 | -1.03186 | 2.506602 |
| P08113 | Hsp90b1 | -1.03291 | 4.263272 |
| P56480 | Atp5f1b | -1.03518 | 4.474125 |
| B2RSH2 | Gnai1 | -1.03541 | 2.822416 |
| P19182 | Ifrd1 | -1.03713 | 2.82472 |
| Q9CPY7 | Lap3 | -1.03715 | 5.274808 |
| P53996 | Cnbp | -1.03903 | 5.134396 |
| Q6ZWZ2 | Ube2r2 | -1.03903 | 3.73464 |
| Q9QYB1 | Clic4 | -1.04059 | 4.259652 |
| Q9CR00 | Psmd9 | -1.04107 | 3.19446 |
| P49718 | Mcm5 | -1.04121 | 4.154766 |
| Q62245 | Sos1 | -1.04123 | 5.267754 |
| Q9Z1E3 | Nfkbia | -1.04144 | 3.077818 |
| Q8C5W3 | Tbcel | -1.04253 | 4.885828 |
| P31938 | Map2k1 | -1.04269 | 4.775798 |
| Q9JHL1 | Nherf2 | -1.04479 | 4.703028 |
| P60710 | Actb | -1.04615 | 2.820813 |
| Q8R0K9 | E2f4 | -1.04652 | 3.24787 |
| Q6PFE3 | Rad54b | -1.04748 | 2.209747 |
| Q60692 | Psmb6 | -1.04758 | 2.341231 |
| Q61584 | Fxr1 | -1.04793 | 5.598055 |
| G5E829 | Atp2b1 | -1.04805 | 2.300322 |
| Q6VN19 | Ranbp10 | -1.04905 | 2.58876 |
| Q9D832 | Dnajb4 | -1.04921 | 3.479813 |
| Q9R1X4 | Timeless | -1.05261 | 3.802717 |
| Q80TQ2 | Cyld | -1.0527 | 3.349488 |
| Q9Z248 | Aebp2 | -1.05554 | 2.8081 |
| Q8BQZ5 | Cpsf4 | -1.05575 | 3.822802 |
| Q9D6R2 | Idh3a | -1.0559 | 4.645866 |
| Q69ZA1 | Cdk13 | -1.05728 | 4.092282 |
| Q9CX86 | Hnrnpa0 | -1.05743 | 4.218376 |
| O55131 | Septin7 | -1.05801 | 5.885145 |
| P47739 | Aldh3a1 | -1.05825 | 2.514871 |
| A2AN08 | Ubr4 | -1.05882 | 5.219426 |
| Q80YV2 | Zc3hc1 | -1.05887 | 3.548523 |
| Q8BH48 | Ubap1 | -1.05892 | 3.5701 |
| Q80UK0 | Sestd1 | -1.05926 | 2.064389 |
| Q9QZ05 | Eif2ak4 | -1.05929 | 3.826167 |
| P59999 | Arpc4 | -1.06107 | 4.021535 |
| Q9Z2I9 | Sucla2 | -1.062 | 2.245557 |
| Q8CIN4 | Pak2 | -1.06333 | 4.132197 |
| Q3UMT1 | Ppp1r12c | -1.06383 | 2.291383 |
| Q04735 | Cdk16 | -1.06627 | 2.17086 |
| Q9ERD7 | Tubb3 | -1.06662 | 3.468897 |
| Q9CQJ1 | Higd2a | -1.06669 | 2.074194 |
| Q80UY2 | Kcmf1 | -1.06728 | 3.610068 |
| P53810 | Pitpna | -1.06736 | 3.845465 |
| Q80UV9 | Taf1 | -1.06776 | 2.136758 |
| A2AAY5 | Sh3pxd2b | -1.06779 | 2.961486 |
| Q9CS00 | Cactin | -1.06784 | 3.850714 |
| P0C0A3 | Chmp6 | -1.06839 | 3.478932 |
| Q8CI08 | Slain2 | -1.06879 | 3.266238 |
| Q8CHY6 | Gatad2a | -1.07051 | 3.946362 |
| Q924T7 | Rnf31 | -1.07116 | 2.741842 |
| Q3UZ39 | Lrrfip1 | -1.07122 | 3.03395 |
| Q6P5E4 | Uggt1 | -1.07149 | 4.838626 |
| Q9Z2M7 | Pmm2 | -1.07216 | 4.260876 |
| Q9QY76 | Vapb | -1.07248 | 2.166244 |
| O55131 | Septin7 | -1.0733 | 4.306311 |
| Q08509 | Eps8 | -1.07334 | 4.435219 |
| A0A7H0DN02 | OPG027 | -1.07404 | 3.261933 |
| P97376 | Frg1 | -1.0764 | 2.302723 |
| P20029 | Hspa5 | -1.07722 | 3.826167 |
| Q5S006 | Lrrk2 | -1.07745 | 2.059542 |
| P54116 | Stom | -1.07771 | 2.481058 |
| Q9CXU1 | Med31 | -1.07808 | 2.619877 |
| Q8BK08 | Tmem11 | -1.07895 | 3.196658 |
| Q8VCX5 | Micu1 | -1.08228 | 4.008234 |
| O35295 | Purb | -1.08314 | 2.305157 |
| P13439 | Umps | -1.08324 | 6.074963 |
| Q5SSI6 | Utp18 | -1.08325 | 2.194123 |
| O54988 | Slk | -1.08331 | 5.456448 |
| Q8CBW3 | Abi1 | -1.08359 | 4.573764 |
| O54931 | Pakap | -1.08375 | 3.971957 |
| Q8BRN9 | Cc2d1b | -1.08538 | 4.410518 |
| Q61686 | Cbx5 | -1.08564 | 4.937787 |
| Q8C1A5 | Thop1 | -1.08564 | 3.1467 |
| Q9WTX8 | Mad1l1 | -1.08779 | 4.620227 |
| Q7TMB8 | Cyfip1 | -1.08781 | 3.83855 |
| Q8C4B4 | Unc119b | -1.08805 | 2.472069 |
| Q61083 | Map3k2 | -1.08833 | 4.171489 |
| P04184 | Tk1 | -1.08899 | 3.541784 |
| Q01320 | Top2a | -1.08962 | 3.579283 |
| P53564 | Cux1 | -1.08963 | 3.049279 |
| Q62159 | Rhoc | -1.09078 | 3.860562 |
| Q9D0M1 | Prpsap1 | -1.09281 | 4.947509 |
| Q9D0B6 | Pbdc1 | -1.09289 | 4.054376 |
| P61022 | Chp1 | -1.093 | 3.034316 |
| O55023 | Impa1 | -1.09445 | 2.919158 |
| Q05BC3 | Eml1 | -1.09455 | 2.883614 |
| Q99PL5 | Rrbp1 | -1.09527 | 3.77358 |
| Q8BJU9 | Mtrf1l | -1.0964 | 2.446463 |
| Q8C147 | Dock8 | -1.09693 | 2.91316 |
| Q61543 | Glg1 | -1.09706 | 3.648164 |
| P97452 | Bop1 | -1.09729 | 3.774377 |
| Q3TSG4 | Alkbh5 | -1.09922 | 3.043655 |
| Q9JHP7 | Poglut2 | -1.10083 | 3.57318 |
| Q80TZ9 | Rere | -1.10295 | 2.945637 |
| Q64727 | Vcl | -1.10311 | 4.855585 |
| Q8CJG0 | Ago2 | -1.1049 | 5.12433 |
| Q9D3E6 | Stag1 | -1.10717 | 3.141566 |
| Q8BPM2 | Map4k5 | -1.10886 | 4.709438 |
| Q8K2B3 | Sdha | -1.11397 | 4.420495 |
| Q922J3 | Clip1 | -1.11632 | 4.231143 |
| Q8K337 | Inpp5b | -1.11696 | 2.428408 |
| P08030 | Aprt | -1.11739 | 3.174296 |
| Q9D9K3 | Aven | -1.12164 | 3.865078 |
| P14873 | Map1b | -1.12211 | 4.687421 |
| P10711 | Tcea1 | -1.12219 | 4.280817 |
| P30415 | Nktr | -1.12332 | 4.742705 |
| Q9CVB6 | Arpc2 | -1.12347 | 4.828925 |
| Q99JY9 | Actr3 | -1.12356 | 5.214663 |
| A0A7H0DMZ8 | OPG022 | -1.12537 | 4.491523 |
| Q3UHF3 | Mier3 | -1.12665 | 2.042629 |
| P09041 | Pgk2 | -1.1296 | 2.222503 |
| Q9Z0R4 | Itsn1 | -1.13019 | 4.099644 |
| Q8BZQ7 | Anapc2 | -1.13047 | 2.996769 |
| Q8K120 | Nfatc4 | -1.13102 | 3.518332 |
| P48024 | Eif1 | -1.13159 | 3.958173 |
| Q91ZU6 | Dst | -1.13183 | 5.062355 |
| P47791 | Gsr | -1.13222 | 4.58009 |
| O88685 | Psmc3 | -1.13265 | 5.229648 |
| P27612 | Plaa | -1.1345 | 5.712944 |
| O88271 | Cfdp1 | -1.13609 | 4.166066 |
| P97363 | Sptlc2 | -1.1384 | 3.576679 |
| P56394 | Cox17 | -1.13843 | 3.330107 |
| Q8BKG3 | Ptk7 | -1.13852 | 3.310893 |
| Q8K2Q5 | Chchd7 | -1.13865 | 3.505011 |
| P26039 | Tln1 | -1.14022 | 5.485443 |
| Q9DCX2 | Atp5pd | -1.14036 | 3.531279 |
| Q5SV77 | Ggnbp2 | -1.14097 | 3.338533 |
| Q501J7 | Phactr4 | -1.14224 | 3.161061 |
| Q8VD62 | Bles03 | -1.143 | 3.802717 |
| Q9D2H6 | Sp2 | -1.14322 | 2.800437 |
| Q91YR1 | Twf1 | -1.14429 | 5.150538 |
| Q9WU42 | Ncor2 | -1.14597 | 3.468897 |
| Q8BXK8 | Agap1 | -1.14707 | 2.219549 |
| Q64455 | Ptprj | -1.14851 | 2.036276 |
| Q3TB82 | Plekhf1 | -1.14965 | 2.016432 |
| Q922J3 | Clip1 | -1.14978 | 4.548988 |
| P57776 | Eef1d | -1.15491 | 5.324351 |
| Q6PER3 | Mapre3 | -1.15621 | 5.836218 |
| Q9Z0N1 | Eif2s3x | -1.15634 | 4.828925 |
| Q8JZN5 | Acad9 | -1.15689 | 2.724804 |
| Q8C1S0 | Med19 | -1.15694 | 3.297778 |
| P61750 | Arf4 | -1.15865 | 2.710036 |
| Q60848 | Hells | -1.15867 | 4.060261 |
| Q9CW46 | Raver1 | -1.15882 | 4.783502 |
| Q68FE8 | Znf280d | -1.15984 | 2.020965 |
| Q3UE37 | Ube2z | -1.16018 | 4.14071 |
| Q9DAU1 | Cnpy3 | -1.1605 | 4.321175 |
| O55135 | Eif6 | -1.16138 | 4.868473 |
| Q6PCP5 | Mff | -1.16192 | 2.396151 |
| Q8K009 | Aldh1l2 | -1.16278 | 4.020712 |
| D3YXK2 | Safb | -1.16349 | 3.418188 |
| Q8BUY9 | Pggt1b | -1.16367 | 2.213903 |
| P61967 | Ap1s1 | -1.16441 | 2.036197 |
| Q9D787 | Ppil2 | -1.16478 | 3.468897 |
| Q61214 | Dyrk1a | -1.16481 | 3.5701 |
| P43346 | Dck | -1.16665 | 3.588216 |
| Q8K268 | Abcf3 | -1.16703 | 4.947509 |
| Q9EQ80 | Nif3l1 | -1.16792 | 3.518332 |
| O08638 | Myh11 | -1.16793 | 2.524305 |
| P97477 | Aurka | -1.1682 | 3.885866 |
| E9Q5G3 | Kif23 | -1.1694 | 3.746319 |
| O88811 | Stam2 | -1.17169 | 4.280817 |
| P09411 | Pgk1 | -1.17495 | 4.768744 |
| Q8BHG1 | Nrdc | -1.17505 | 5.229648 |
| Q8BXR9 | Osbpl6 | -1.17803 | 3.478932 |
| P35700 | Prdx1 | -1.17841 | 2.915563 |
| Q62108 | Dlg4 | -1.1785 | 3.590737 |
| Q60876 | Eif4ebp1 | -1.18108 | 2.507013 |
| Q9JKR6 | Hyou1 | -1.18187 | 3.733186 |
| P21107 | Tpm3 | -1.18307 | 3.182693 |
| Q91ZR2 | Snx18 | -1.18312 | 5.324351 |
| Q80VJ2 | Sra1 | -1.18465 | 4.60312 |
| O70566 | Diaph2 | -1.18515 | 4.237734 |
| Q9D4D4 | Tktl2 | -1.18536 | 2.273497 |
| Q9Z0R6 | Itsn2 | -1.18587 | 3.479813 |
| Q3THE2 | Myl12b | -1.18679 | 3.016433 |
| Q9QZ23 | Nfu1 | -1.18688 | 3.284501 |
| P45878 | Fkbp2 | -1.18693 | 4.258612 |
| A2A9C3 | Szt2 | -1.1878 | 3.401382 |
| Q8BJM5 | Slc30a6 | -1.18875 | 2.826825 |
| Q91YW3 | Dnajc3 | -1.19054 | 3.88221 |
| Q9DBN5 | Lonp2 | -1.19141 | 3.808665 |
| Q810J8 | Zfyve1 | -1.19206 | 2.971043 |
| Q9D3D0 | Ttpal | -1.19212 | 2.426047 |
| Q99JY9 | Actr3 | -1.19226 | 3.036087 |
| P33215 | Nedd1 | -1.19234 | 4.075093 |
| P97324 | G6pd2 | -1.194 | 2.943668 |
| Q9JL62 | Gltp | -1.19543 | 3.403744 |
| P61982 | Ywhag | -1.19547 | 3.166312 |
| Q8K274 | Fn3krp | -1.19589 | 2.671862 |
| Q9CY18 | Snx7 | -1.19635 | 5.573184 |
| P62137 | Ppp1ca | -1.19638 | 4.036375 |
| Q8BG51 | Rhot1 | -1.19684 | 3.909311 |
| Q0KL02 | Trio | -1.1979 | 4.910968 |
| P35831 | Ptpn12 | -1.19873 | 5.040455 |
| Q9JLQ2 | Git2 | -1.20028 | 3.767177 |
| Q9ES46 | Parvb | -1.20224 | 3.795884 |
| Q0VEE6 | Znf800 | -1.20299 | 2.191987 |
| Q8C166 | Cpne1 | -1.20431 | 3.418851 |
| Q9R207 | Nbn | -1.2057 | 3.987762 |
| O88990 | Actn3 | -1.20911 | 3.815563 |
| Q9DBJ1 | Pgam1 | -1.21327 | 5.947495 |
| O35887 | Calu | -1.2138 | 4.063212 |
| P62192 | Psmc1 | -1.21399 | 5.404448 |
| P56399 | Usp5 | -1.21482 | 5.720582 |
| Q3TNA1 | Xylb | -1.21634 | 2.10454 |
| Q3UFY7 | Nt5c3b | -1.2174 | 2.574072 |
| Q9JJ78 | Pbk | -1.21768 | 3.127084 |
| Q6PNC0 | Dmxl1 | -1.21821 | 5.15546 |
| Q9CY34 | Ube2f | -1.22099 | 3.845465 |
| Q9CZ44 | Nsfl1c | -1.22265 | 4.366752 |
| Q9QZM0 | Ubqln2 | -1.22456 | 4.916992 |
| P35123 | Usp4 | -1.22637 | 3.948082 |
| Q9Z1S0 | Bub1b | -1.22658 | 4.990428 |
| Q99KH8 | Stk24 | -1.22659 | 4.936842 |
| P09041 | Pgk2 | -1.22775 | 6.384665 |
| Q9JJ28 | Flii | -1.22882 | 4.548988 |
| Q9QZ88 | Vps29 | -1.22905 | 4.740854 |
| Q922R5 | Ppp4r3b | -1.22905 | 3.460326 |
| Q6PHZ2 | Camk2d | -1.231 | 4.977734 |
| P70441 | Nherf1 | -1.23165 | 3.398939 |
| Q9DCD0 | Pgd | -1.23176 | 5.158953 |
| Q8BWT5 | Dip2a | -1.23201 | 3.21385 |
| Q8C1B7 | Septin11 | -1.23483 | 3.88289 |
| P11440 | Cdk1 | -1.23824 | 3.394627 |
| Q8BTY2 | Slc4a7 | -1.23928 | 3.588606 |
| P55194 | Sh3bp1 | -1.24007 | 2.917089 |
| Q9EPC1 | Parva | -1.24087 | 4.114502 |
| Q80XC6 | Nrde2 | -1.24698 | 3.23692 |
| Q6DVA0 | Lemd2 | -1.24799 | 2.617979 |
| Q91VX2 | Ubap2 | -1.24828 | 5.947495 |
| Q923T9 | Camk2g | -1.24992 | 4.603959 |
| Q8R149 | Bud13 | -1.2525 | 3.027449 |
| Q9WVS8 | Mapk7 | -1.25481 | 2.8654 |
| P70270 | Rad54l | -1.25566 | 2.199314 |
| Q91VH6 | Memo1 | -1.25584 | 4.656736 |
| Q5SF07 | Igf2bp2 | -1.25588 | 4.118825 |
| Q9CQ39 | Med21 | -1.25653 | 3.883384 |
| Q811D0 | Dlg1 | -1.25654 | 4.580981 |
| Q8CHU3 | Epn2 | -1.25813 | 5.090855 |
| Q9ER41 | Tor1b | -1.25827 | 4.44795 |
| Q9JII6 | Akr1a1 | -1.25926 | 3.449304 |
| Q8BJS4 | Sun2 | -1.26037 | 2.551114 |
| Q62188 | Dpysl3 | -1.26141 | 4.695022 |
| Q9R0Q6 | Arpc1a | -1.2617 | 2.856407 |
| Q9DB77 | Uqcrc2 | -1.26346 | 3.532585 |
| Q8CFJ9 | Wdr24 | -1.26566 | 3.341607 |
| Q9CQ60 | Pgls | -1.26753 | 4.011228 |
| Q91W59 | Rbms1 | -1.26769 | 4.544508 |
| Q80WE4 | Kif20b | -1.2698 | 3.800955 |
| Q9ER73 | Elp4 | -1.27095 | 3.035477 |
| Q3UGR5 | Hdhd2 | -1.27289 | 4.382489 |
| Q8C0I4 | Epc2 | -1.27443 | 2.280788 |
| Q9CYN9 | Atp6ap2 | -1.27609 | 4.073272 |
| A0A7H0DNF5 | OPG193 | -1.28056 | 4.680609 |
| Q9QUR6 | Prep | -1.28468 | 4.98187 |
| P27641 | Xrcc5 | -1.2848 | 2.445006 |
| O88587 | Comt | -1.29066 | 3.958628 |
| Q8R146 | Apeh | -1.29097 | 4.789252 |
| P12382 | Pfkl | -1.2916 | 3.561951 |
| P54071 | Idh2 | -1.29222 | 5.274722 |
| A2CG49 | Kalrn | -1.29427 | 4.896101 |
| O35379 | Abcc1 | -1.29439 | 2.936567 |
| P09103 | P4hb | -1.29453 | 4.828925 |
| Q922E4 | Pcyt2 | -1.29524 | 4.073272 |
| P0DTN0 | OPG002 | -1.30084 | 3.183339 |
| Q922H2 | Pdk3 | -1.30094 | 4.678989 |
| Q8CIG3 | Kdm1b | -1.30255 | 2.725964 |
| Q91YS8 | Camk1 | -1.30422 | 5.236191 |
| Q9CZN7 | Shmt2 | -1.30662 | 5.456448 |
| P70349 | Hint1 | -1.30694 | 5.069107 |
| Q99ME2 | Wdr6 | -1.30944 | 4.300795 |
| Q3UE17 | Mex3d | -1.31041 | 2.870388 |
| Q61687 | Atrx | -1.31275 | 4.763898 |
| B2RSH2 | Gnai1 | -1.31341 | 2.761952 |
| Q8BKX1 | Baiap2 | -1.31427 | 5.217755 |
| P14211 | Calr | -1.31691 | 3.860641 |
| Q9WUU8 | Tnip1 | -1.31942 | 3.489271 |
| O09172 | Gclm | -1.31961 | 3.020075 |
| Q9ERH4 | Nusap1 | -1.32059 | 2.02911 |
| Q8CHK4 | Kat5 | -1.32213 | 2.925187 |
| Q3TUA9 | Pomk | -1.32442 | 2.217492 |
| P15331 | Prph | -1.32583 | 2.710927 |
| Q69Z38 | Peak1 | -1.32847 | 2.998684 |
| Q6P9L6 | Kif15 | -1.3291 | 5.06881 |
| P03958 | Ada | -1.33318 | 3.963825 |
| Q9CR86 | Carhsp1 | -1.33522 | 4.768744 |
| Q9JJN5 | Cpn1 | -1.3357 | 2.225176 |
| Q01405 | Sec23a | -1.33739 | 3.976082 |
| Q8CJ53 | Trip10 | -1.33787 | 3.42914 |
| P21981 | Tgm2 | -1.33978 | 3.335413 |
| Q9QWT9 | Kifc1 | -1.34192 | 2.512243 |
| Q8BP47 | Nars1 | -1.34447 | 5.485443 |
| P58871 | Tnks1bp1 | -1.34573 | 4.745015 |
| Q02819 | Nucb1 | -1.34783 | 4.831304 |
| P35293 | Rab18 | -1.34864 | 4.060801 |
| Q80Y50 | Camta2 | -1.35066 | 2.105062 |
| O70404 | Vamp8 | -1.35263 | 3.404227 |
| Q9DAR7 | Dcps | -1.35399 | 5.08683 |
| Q3UHJ0 | Aak1 | -1.35444 | 5.130024 |
| Q6RHR9 | Magi1 | -1.35541 | 2.267469 |
| Q8BVE8 | Nsd2 | -1.35574 | 4.876898 |
| P70404 | Idh3g | -1.35658 | 4.665075 |
| Q8BI72 | Cdkn2aip | -1.35824 | 4.236364 |
| Q6A0A9 | FAM120A | -1.3596 | 6.536449 |
| Q8K0W9 | Dph3 | -1.36019 | 2.088979 |
| Q9R1S8 | Capn7 | -1.3608 | 2.305146 |
| Q8BVI4 | Qdpr | -1.3612 | 4.33492 |
| Q920R0 | Als2 | -1.36384 | 2.24 |
| O88456 | Capns1 | -1.36391 | 4.065931 |
| Q80UG5 | Septin9 | -1.36415 | 6.45768 |
| Q7TPV2 | Dzip3 | -1.36454 | 3.612618 |
| Q8R4U7 | Luzp1 | -1.36561 | 2.655705 |
| Q91W40 | Klc3 | -1.367 | 3.327504 |
| P57780 | Actn4 | -1.36966 | 4.780102 |
| Q9D1N9 | Mrpl21 | -1.37221 | 2.37907 |
| Q9Z2R6 | Unc119 | -1.37442 | 3.425533 |
| P47713 | Pla2g4a | -1.37677 | 4.491523 |
| Q9D662 | Sec23b | -1.37944 | 5.159508 |
| Q61029 | Tmpo | -1.38177 | 2.263252 |
| Q06180 | Ptpn2 | -1.38184 | 3.128621 |
| Q9DB00 | Gon4l | -1.38252 | 3.002739 |
| P11798 | Camk2a | -1.38624 | 3.865078 |
| Q7TSG2 | Ctdp1 | -1.38643 | 5.07628 |
| Q9JK81 | Myg1 | -1.38692 | 2.891798 |
| P27661 | H2ax | -1.38889 | 2.716497 |
| Q8C3Y4 | Kntc1 | -1.39165 | 3.672864 |
| P46414 | Cdkn1b | -1.39183 | 2.025525 |
| Q64516 | Gk | -1.39197 | 2.268922 |
| Q920Q8 | Ivns1abp | -1.40445 | 4.160465 |
| Q922Q4 | Pycr2 | -1.40549 | 2.796627 |
| O54984 | Get3 | -1.4062 | 5.402248 |
| P18242 | Ctsd | -1.409 | 5.081822 |
| Q9Z2D1 | Mtmr2 | -1.41664 | 3.418875 |
| P26040 | Ezr | -1.41907 | 4.943475 |
| Q8VBT9 | Aspscr1 | -1.41941 | 3.534652 |
| Q9DBC7 | Prkar1a | -1.42371 | 4.48238 |
| Q01853 | Vcp | -1.42498 | 5.364449 |
| P52480 | Pkm | -1.42762 | 5.720582 |
| Q9DB20 | Atp5po | -1.42824 | 3.030769 |
| Q9D902 | Gtf2e2 | -1.42911 | 4.154766 |
| Q99MK9 | Rassf1 | -1.43311 | 2.317649 |
| Q8CB77 | Eloa | -1.43625 | 3.59493 |
| Q9JM14 | Nt5c | -1.43835 | 4.15475 |
| P18653 | Rps6ka1 | -1.44139 | 3.416723 |
| Q9EPV8 | Ubl5 | -1.44177 | 3.801926 |
| P52480 | Pkm | -1.44369 | 2.393206 |
| Q8CH72 | Trim32 | -1.4444 | 3.548345 |
| Q8CGK3 | Lonp1 | -1.44624 | 4.382256 |
| Q9ES00 | Ube4b | -1.44639 | 5.00222 |
| P50544 | Acadvl | -1.44676 | 3.195766 |
| Q64674 | Srm | -1.45137 | 5.966726 |
| Q9CZX0 | Elp3 | -1.45259 | 3.538393 |
| O35350 | Capn1 | -1.45667 | 4.166112 |
| P70459 | Erf | -1.45682 | 2.778109 |
| O08664 | Bcl7c | -1.458 | 3.518703 |
| Q8R059 | Gale | -1.45878 | 3.653992 |
| P98083 | Shc1 | -1.46198 | 2.8081 |
| P47199 | Cryz | -1.46262 | 2.544855 |
| B2RRE7 | Otud4 | -1.46388 | 3.980154 |
| Q91V12 | Acot7 | -1.46414 | 5.600914 |
| P47226 | Tes | -1.4652 | 4.883446 |
| Q8BTY1 | Kyat1 | -1.4662 | 3.30492 |
| O35711 | Ppfibp2 | -1.46709 | 3.103718 |
| Q8R317 | Ubqln1 | -1.47017 | 3.83277 |
| Q02384 | Sos2 | -1.47867 | 3.357964 |
| O08638 | Myh11 | -1.48253 | 3.695888 |
| Q9D7I8 | Fam83d | -1.48415 | 2.13123 |
| Q80X90 | Flnb | -1.4844 | 3.66544 |
| Q8BW96 | Camk1d | -1.48599 | 3.563353 |
| O08784 | Tcof1 | -1.48872 | 3.254486 |
| Q9DBS9 | Osbpl3 | -1.48886 | 4.09162 |
| A6H8H2 | Dennd4c | -1.49399 | 4.777691 |
| Q80W47 | Wipi2 | -1.49532 | 3.490565 |
| Q9JMH9 | Myo18a | -1.49732 | 3.477624 |
| P27773 | Pdia3 | -1.49825 | 4.566741 |
| Q68FL4 | Ahcyl2 | -1.49897 | 4.348653 |
| P33174 | Kif4 | -1.50104 | 3.865324 |
| Q8BT07 | Cep55 | -1.50236 | 3.752342 |
| Q5FWK3 | Arhgap1 | -1.50508 | 5.600914 |
| Q61879 | Myh10 | -1.50685 | 5.640145 |
| Q3TJD7 | Pdlim7 | -1.50824 | 5.253471 |
| P51480 | Cdkn2a | -1.50845 | 5.307007 |
| A2RSY1 | Kansl3 | -1.50933 | 2.332721 |
| A2AMM0 | Cavin4 | -1.50945 | 3.063023 |
| O08532 | Cacna2d1 | -1.51204 | 2.373078 |
| P06801 | Me1 | -1.51336 | 5.185028 |
| Q9JHJ0 | Tmod3 | -1.51464 | 4.601953 |
| Q9ER81 | Tor1aip2 | -1.52399 | 3.398145 |
| P05480 | Src | -1.52677 | 2.413104 |
| P22315 | Fech | -1.52779 | 2.16648 |
| Q9DCN2 | Cyb5r3 | -1.52912 | 2.471649 |
| Q9Z0U1 | Tjp2 | -1.53022 | 5.50729 |
| P06151 | Ldha | -1.5303 | 3.490957 |
| Q8BUY5 | Timmdc1 | -1.53071 | 2.860741 |
| P60766 | Cdc42 | -1.53313 | 4.166066 |
| Q8CDM1 | Atad2 | -1.5355 | 3.735632 |
| P13864 | Dnmt1 | -1.53744 | 4.401282 |
| P37913 | Lig1 | -1.5423 | 5.229648 |
| Q68EF0 | Rab3ip | -1.54733 | 2.732229 |
| Q921F4 | Hnrnpll | -1.5502 | 6.239839 |
| Q06186 | Hbegf | -1.55076 | 2.451282 |
| P70445 | Eif4ebp2 | -1.55221 | 2.816403 |
| Q9R0P3 | Esd | -1.55286 | 5.00222 |
| Q99P72 | Rtn4 | -1.55347 | 4.062859 |
| Q91W89 | Man2c1 | -1.55382 | 2.450808 |
| Q8BM55 | Tmem214 | -1.55477 | 2.323223 |
| O08529 | Capn2 | -1.55498 | 4.977734 |
| Q8K1J6 | Trnt1 | -1.55758 | 3.838073 |
| Q8BH59 | Slc25a12 | -1.55781 | 3.510193 |
| Q99104 | Myo5a | -1.56569 | 5.582146 |
| Q9QZW0 | Atp11c | -1.57041 | 3.532585 |
| Q8K0B2 | Lmbrd1 | -1.57319 | 2.143436 |
| P62500 | Tsc22d1 | -1.57656 | 3.148651 |
| O70445 | Bard1 | -1.5801 | 2.114042 |
| Q9EPK5 | Wwtr1 | -1.58103 | 2.625094 |
| Q8K1L5 | Ppp1r11 | -1.58269 | 3.634513 |
| Q99KS6 | Adprm | -1.58532 | 5.255334 |
| Q9D0M3 | Cyc1 | -1.58887 | 3.030977 |
| Q9D198 | Syf2 | -1.59279 | 3.720802 |
| Q8R3B1 | Plcd1 | -1.59588 | 2.153101 |
| Q07076 | Anxa7 | -1.59636 | 2.368473 |
| Q9WV30 | Nfat5 | -1.60146 | 3.559198 |
| Q8CBE3 | Wdr37 | -1.60152 | 3.22441 |
| Q920A5 | Scpep1 | -1.60227 | 4.789252 |
| Q8K3X4 | Irf2bpl | -1.60278 | 3.597183 |
| Q8CHG7 | Rapgef2 | -1.60493 | 2.059296 |
| Q8R4Y8 | Rttn | -1.60627 | 3.546691 |
| P59108 | Cpne2 | -1.60872 | 3.297778 |
| Q9Z1Q9 | Vars1 | -1.6093 | 5.947495 |
| Q99LD8 | Ddah2 | -1.60946 | 5.364449 |
| Q4VAA7 | Snx33 | -1.6095 | 2.431682 |
| Q9EP71 | Rai14 | -1.61042 | 5.600914 |
| P14733 | Lmnb1 | -1.61282 | 4.118045 |
| Q9DBG9 | Tax1bp3 | -1.61654 | 4.736371 |
| Q9CX30 | Yif1b | -1.61867 | 2.236022 |
| Q8C8U0 | Ppfibp1 | -1.61934 | 4.742018 |
| Q8BGH7 | Cdc42se2 | -1.62676 | 2.977205 |
| Q8BL95 | Cfap298 | -1.62783 | 3.840186 |
| P08103 | Hck | -1.63176 | 3.18618 |
| Q62523 | Zyx | -1.63192 | 3.297093 |
| P52623 | Uck1 | -1.63418 | 3.304141 |
| Q9QYI4 | Dnajb12 | -1.63943 | 2.252196 |
| Q3V3Q7 | Pacs2 | -1.6435 | 2.245955 |
| Q8BU85 | Msrb3 | -1.64525 | 3.624601 |
| Q9WUM3 | Coro1b | -1.64692 | 4.311198 |
| Q9D1I5 | Mcee | -1.6489 | 2.141728 |
| Q8VHX2 | Edaradd | -1.64972 | 4.067546 |
| Q8VDZ4 | Zdhhc5 | -1.64994 | 2.765338 |
| P02469 | Lamb1 | -1.65206 | 4.429212 |
| Q8R3C6 | Rbm19 | -1.65529 | 5.50729 |
| Q8K3W3 | Casc3 | -1.65591 | 2.310124 |
| B2RUR8 | Otud7b | -1.65603 | 4.229654 |
| Q64514 | Tpp2 | -1.6628 | 7.133103 |
| L0N7N1 | Kif14 | -1.66362 | 2.377317 |
| C0HKE1 | H2ac4 | -1.66503 | 3.365639 |
| P12388 | Serpinb2 | -1.66532 | 3.975894 |
| P21107 | Tpm3 | -1.6666 | 5.072962 |
| Q08775 | Runx2 | -1.66779 | 2.020804 |
| Q7TT50 | Cdc42bpb | -1.66786 | 5.214865 |
| O35385 | Ppef2 | -1.66915 | 2.872895 |
| Q9CQ92 | Fis1 | -1.67292 | 4.947509 |
| Q6PDH0 | Phldb1 | -1.67314 | 2.763757 |
| Q5PRF0 | Heatr5a | -1.68148 | 3.57018 |
| Q9DBS2 | Tprg1l | -1.6838 | 2.03811 |
| P18760 | Cfl1 | -1.68663 | 2.490627 |
| P31266 | Rbpj | -1.68895 | 4.044351 |
| O35874 | Slc1a4 | -1.69482 | 2.451127 |
| Q3TZZ7 | Esyt2 | -1.69574 | 4.428869 |
| Q8BSY0 | Asph | -1.70718 | 2.938937 |
| Q9CYL5 | Glipr2 | -1.70869 | 2.8654 |
| Q9WTK7 | Stk11 | -1.70958 | 3.584544 |
| P63028 | Tpt1 | -1.71175 | 4.551003 |
| Q924A2 | Cic | -1.71655 | 2.348715 |
| O08553 | Dpysl2 | -1.71926 | 3.472245 |
| P50431 | Shmt1 | -1.72028 | 4.535802 |
| P48962 | Slc25a4 | -1.72372 | 2.385143 |
| P19324 | Serpinh1 | -1.72478 | 4.782877 |
| P02798 | Mt2 | -1.72551 | 4.783502 |
| Q9R0A0 | Pex14 | -1.72914 | 2.872896 |
| Q3TAS6 | Emc10 | -1.73197 | 2.141728 |
| Q8BYB9 | Poglut1 | -1.73528 | 4.031829 |
| Q9D968 | Hcfc2 | -1.73562 | 3.330107 |
| P60710 | Actb | -1.73572 | 4.536961 |
| Q922J9 | Far1 | -1.74423 | 2.984226 |
| Q9Z1B3 | Plcb1 | -1.7536 | 2.433034 |
| Q6ZQ73 | Cand2 | -1.7561 | 3.693186 |
| Q9DBU0 | Tm9sf1 | -1.7581 | 2.551524 |
| Q9R0N0 | Galk1 | -1.7583 | 4.108699 |
| Q8BT60 | Cpne3 | -1.76346 | 3.807027 |
| O08691 | Arg2 | -1.76674 | 3.801002 |
| Q8K0Q5 | Arhgap18 | -1.77289 | 2.128561 |
| P17809 | Slc2a1 | -1.7737 | 2.865498 |
| Q8R1J9 | Tor2a | -1.77548 | 2.714335 |
| Q64430 | Atp7a | -1.77572 | 2.948318 |
| O54946 | Dnajb6 | -1.77944 | 3.727471 |
| P21271 | Myo5b | -1.77984 | 3.716726 |
| P39428 | Traf1 | -1.78277 | 2.095412 |
| P61025 | Cks1b | -1.78562 | 4.227615 |
| P97384 | Anxa11 | -1.78601 | 3.245349 |
| Q03145 | Epha2 | -1.78646 | 3.695888 |
| P12382 | Pfkl | -1.78869 | 3.471545 |
| Q61810 | Ltbp3 | -1.79785 | 2.677621 |
| O70433 | Fhl2 | -1.80467 | 3.828987 |
| Q99KI0 | Aco2 | -1.80925 | 5.50729 |
| Q8R127 | Sccpdh | -1.81581 | 3.474707 |
| P35601 | Rfc1 | -1.82328 | 4.56537 |
| Q91VW3 | Sh3bgrl3 | -1.8263 | 6.070247 |
| Q91W67 | Ubl7 | -1.82695 | 6.081184 |
| Q60716 | P4ha2 | -1.82725 | 4.169506 |
| Q9CWV6 | Prkrip1 | -1.82754 | 4.943475 |
| P16858 | Gapdh | -1.82879 | 4.80299 |
| Q91X58 | **Zfand2b** | -1.83069 | 3.807027 |
| Q6PB44 | Ptpn23 | -1.83163 | 5.550357 |
| Q69ZK6 | Jmjd1c | -1.83702 | 2.697036 |
| Q9WVL2 | Stat2 | -1.83807 | 3.691988 |
| P51432 | Plcb3 | -1.84129 | 4.53754 |
| Q62465 | Vat1 | -1.84405 | 5.485443 |
| Q60875 | Arhgef2 | -1.84853 | 4.937787 |
| Q00612 | G6pdx | -1.85256 | 4.911396 |
| Q9QXY6 | Ehd3 | -1.86001 | 4.602518 |
| Q9JK91 | Mlh1 | -1.86006 | 2.431028 |
| Q6ZWY3 | Rps27l | -1.86283 | 4.619631 |
| P70290 | Mpp1 | -1.8639 | 4.620493 |
| Q60715 | P4ha1 | -1.86833 | 4.435219 |
| Q61207 | Psap | -1.86868 | 3.554111 |
| Q8VHI3 | Pofut2 | -1.87178 | 2.775681 |
| O08601 | Mttp | -1.87369 | 2.861884 |
| Q7TPR4 | Actn1 | -1.87508 | 6.346893 |
| Q9QY66 | Znhit2 | -1.88117 | 3.855861 |
| Q8N7N5 | Dcaf8 | -1.88457 | 4.641197 |
| O70306 | Tbx15 | -1.88772 | 2.101454 |
| O08638 | Myh11 | -1.89099 | 3.688585 |
| Q8R1F1 | Niban2 | -1.89101 | 4.883446 |
| Q0GNC1 | Inf2 | -1.89491 | 4.250912 |
| Q3TLI0 | Trappc10 | -1.89502 | 2.883614 |
| P23591 | Gfus | -1.89911 | 5.14629 |
| P08752 | Gnai2 | -1.90177 | 3.124139 |
| Q61739 | Itga6 | -1.9026 | 3.699029 |
| O08599 | Stxbp1 | -1.90311 | 5.301967 |
| Q91VH2 | Snx9 | -1.90387 | 5.135241 |
| Q80XC3 | Usp6nl | -1.90693 | 2.948318 |
| Q6ZQJ5 | Dna2 | -1.90815 | 3.05552 |
| O70475 | Ugdh | -1.91275 | 5.553901 |
| Q9Z247 | Fkbp9 | -1.91632 | 3.59391 |
| Q61879 | Myh10 | -1.91784 | 3.939552 |
| P20152 | Vim | -1.91829 | 4.72549 |
| O35295 | Purb | -1.91895 | 5.394683 |
| P10922 | H1-0 | -1.92275 | 2.918324 |
| P84075 | Hpca | -1.92764 | 2.506715 |
| P43275 | H1-1 | -1.929 | 2.432802 |
| Q3UZ18 | Ice2 | -1.93221 | 2.685399 |
| D3Z4S3 | Ptrhd1 | -1.93917 | 3.220384 |
| P56212 | Arpp19 | -1.94356 | 2.997423 |
| O09130 | Nfatc2ip | -1.9446 | 2.521548 |
| Q9D2R8 | Mrps33 | -1.9459 | 2.630302 |
| Q91ZV0 | Mia2 | -1.94644 | 2.299287 |
| P00375 | Dhfr | -1.95036 | 4.747691 |
| P56390 | Cks2 | -1.95207 | 3.685325 |
| Q3UMF0 | Cobll1 | -1.9536 | 2.180466 |
| Q9CQ65 | Mtap | -1.95576 | 5.771121 |
| Q8BW96 | Camk1d | -1.9561 | 3.100342 |
| Q60793 | Klf4 | -1.95991 | 2.297037 |
| Q921I6 | Sh3bp4 | -1.96098 | 2.130989 |
| Q91XE4 | Acy3 | -1.96645 | 2.264563 |
| Q9CQG3 | Zmynd19 | -1.9693 | 2.044438 |
| P97432 | Nbr1 | -1.97111 | 2.474019 |
| Q80TM9 | Nisch | -1.97178 | 5.013779 |
| Q8BNV1 | Trmt2a | -1.97386 | 4.758922 |
| Q9CWT3 | Snx10 | -1.97757 | 3.994132 |
| Q9D3D9 | Atp5f1d | -1.97867 | 2.701108 |
| Q8R4K2 | Irak4 | -1.98676 | 2.455527 |
| Q8K136 | Scnm1 | -1.99779 | 2.562449 |
| Q60597 | Ogdh | -2.00643 | 5.638383 |
| Q61490 | Alcam | -2.00903 | 3.538393 |
| Q91VW5 | Golga4 | -2.01444 | 2.051201 |
| P35123 | Usp4 | -2.01687 | 5.456448 |
| Q7SIG6 | Asap2 | -2.01908 | 2.222503 |
| Q99N85 | Mrps18a | -2.03173 | 3.996801 |
| Q9DB54 | Fam216a | -2.03206 | 3.512154 |
| Q9Z0R0 | Haspin | -2.03444 | 2.165405 |
| P81122 | Irs2 | -2.04438 | 2.912749 |
| Q69ZI1 | Sh3rf1 | -2.04463 | 3.03941 |
| P48036 | Anxa5 | -2.04465 | 2.051201 |
| Q3UHH1 | Zswim8 | -2.04548 | 4.765542 |
| Q3U0M1 | Trappc9 | -2.04896 | 2.635777 |
| P31324 | Prkar2b | -2.04926 | 5.150538 |
| Q3TMW1 | Ccdc102a | -2.04945 | 4.235973 |
| O88342 | Wdr1 | -2.05964 | 5.615952 |
| Q8R5A6 | Tbc1d22a | -2.06048 | 2.913838 |
| Q9QUR8 | Sema7a | -2.06248 | 2.68288 |
| Q9D1M7 | Fkbp11 | -2.07232 | 2.331657 |
| Q8VC03 | Eml3 | -2.0815 | 2.061625 |
| Q9CPQ5 | Cenpq | -2.08318 | 2.037916 |
| Q64092 | Tfe3 | -2.09213 | 3.085156 |
| P30681 | Hmgb2 | -2.09415 | 5.940648 |
| O08785 | Clock | -2.09596 | 3.90821 |
| P48760 | Fpgs | -2.10726 | 2.197596 |
| A0A7H0DN00 | OPG023 | -2.10818 | 4.479171 |
| Q8VDD5 | Myh9 | -2.10956 | 6.239839 |
| O35704 | Sptlc1 | -2.11001 | 2.206046 |
| Q64267 | Xpa | -2.11051 | 2.396646 |
| Q8BTM8 | Flna | -2.11394 | 6.384665 |
| P43277 | H1-3 | -2.11844 | 2.296392 |
| Q8C1Z7 | Bbs4 | -2.1198 | 2.635039 |
| Q91XB0 | Trex1 | -2.1202 | 3.186391 |
| Q5DTT3 | Tasor2 | -2.12127 | 2.459658 |
| Q8R3P2 | Dtx2 | -2.12552 | 2.806358 |
| Q61792 | Lasp1 | -2.13337 | 5.84678 |
| O70311 | Nmt2 | -2.13565 | 3.860621 |
| P61028 | Rab8b | -2.13756 | 2.776535 |
| Q5SXJ3 | Brip1 | -2.1376 | 2.909934 |
| Q9CQ20 | Mid1ip1 | -2.13781 | 2.153735 |
| P97329 | Kif20a | -2.13787 | 5.057465 |
| Q69ZF3 | Gba2 | -2.14303 | 2.385143 |
| Q9CQV4 | Retreg3 | -2.14645 | 2.123681 |
| Q91WK7 | Ankrd54 | -2.15511 | 2.227419 |
| P46718 | Pdcd2 | -2.15686 | 2.611784 |
| Q9CR14 | Fancl | -2.16067 | 2.551214 |
| Q9JIM1 | Slc29a1 | -2.16146 | 2.881567 |
| Q923Q2 | Stard13 | -2.16517 | 2.106365 |
| Q8BG73 | Sh3bgrl2 | -2.16706 | 5.615952 |
| P20152 | Vim | -2.16795 | 5.55166 |
| Q8K3Z9 | Pom121 | -2.18671 | 2.118531 |
| Q64311 | Ntan1 | -2.19225 | 3.731439 |
| O35621 | Pmm1 | -2.19502 | 2.424931 |
| Q8BJH1 | Zc2hc1a | -2.19572 | 2.1786 |
| Q810L3 | Chfr | -2.19858 | 2.249072 |
| Q76LS9 | Mindy1 | -2.19904 | 3.860621 |
| O08638 | Myh11 | -2.20492 | 5.011131 |
| Q8VI36 | Pxn | -2.20533 | 5.699939 |
| Q9D084 | Cenps | -2.20634 | 2.889329 |
| F8VPU2 | Farp1 | -2.20657 | 3.860387 |
| Q8CAB8 | Castor2 | -2.20713 | 2.263796 |
| Q91WT8 | Rbm47 | -2.20791 | 2.26408 |
| Q8K212 | Pacs1 | -2.20893 | 4.813039 |
| Q9JJ11 | Tacc3 | -2.2106 | 3.624245 |
| Q9DB42 | Znf593 | -2.21136 | 4.706971 |
| Q52KR3 | Prune2 | -2.21334 | 2.901018 |
| Q80X90 | Flnb | -2.22647 | 7.374803 |
| Q9D771 | Pacc1 | -2.22954 | 2.644501 |
| Q9R059 | Fhl3 | -2.2313 | 4.868942 |
| Q8K2Y9 | Ccm2 | -2.23226 | 3.341607 |
| Q80X90 | Flnb | -2.23716 | 5.072962 |
| P30561 | Ahr | -2.23997 | 3.72971 |
| Q8BIG7 | Comtd1 | -2.2481 | 3.94128 |
| Q8BPZ8 | Abraxas1 | -2.24815 | 2.165759 |
| P12382 | Pfkl | -2.25004 | 6.239839 |
| Q9D8L5 | Ccdc91 | -2.25086 | 2.706369 |
| Q80W14 | Prpf40b | -2.25596 | 2.91218 |
| Q8CIL4 | Fsaf1 | -2.25695 | 2.534609 |
| Q3UMR5 | Mcu | -2.25983 | 4.477033 |
| Q9JLG8 | Capn15 | -2.26503 | 2.545402 |
| P21995 | Emb | -2.2661 | 3.516721 |
| Q9CXP8 | Gng10 | -2.26729 | 2.701108 |
| P38060 | Hmgcl | -2.26756 | 3.871176 |
| Q07113 | Igf2r | -2.27778 | 3.130857 |
| Q8CHE4 | Phlpp1 | -2.27894 | 3.09618 |
| Q8CDN6 | Txnl1 | -2.28522 | 5.771121 |
| Q9DBW3 | Natd1 | -2.29161 | 2.002639 |
| Q5SV80 | Myo19 | -2.30731 | 2.607235 |
| Q8C115 | Plekhh2 | -2.31298 | 3.176985 |
| Q5EE38 | Acd | -2.31514 | 3.192667 |
| Q9EQ15 | Gnb1l | -2.31585 | 2.177206 |
| P50637 | Tspo | -2.31643 | 3.127355 |
| Q8BHC4 | Dcakd | -2.32391 | 2.287438 |
| P27048 | Snrpb | -2.32447 | 2.343605 |
| Q7TPS0 | Rps6ka6 | -2.33672 | 4.114502 |
| O08553 | Dpysl2 | -2.3378 | 5.947495 |
| O09005 | Degs1 | -2.33802 | 4.22989 |
| Q9D0K2 | Oxct1 | -2.33976 | 5.013779 |
| Q9D8U7 | Dtwd1 | -2.34133 | 3.376512 |
| Q6P6I6 | Polr2m | -2.34326 | 3.845465 |
| Q6GV12 | Kdsr | -2.34566 | 3.079859 |
| Q6PE15 | Abhd10 | -2.34742 | 3.732655 |
| Q80U35 | Arhgef17 | -2.34803 | 2.026507 |
| Q922E6 | Fastkd2 | -2.34964 | 2.438354 |
| Q8BGR8 | Gskip | -2.35353 | 3.296169 |
| P11276 | Fn1 | -2.35383 | 4.064179 |
| Q3U4G3 | Xxylt1 | -2.35994 | 2.581588 |
| Q9JIA7 | Sphk2 | -2.36055 | 2.292202 |
| P54818 | Galc | -2.36283 | 3.56678 |
| P17095 | Hmga1 | -2.36295 | 3.918871 |
| P47754 | Capza2 | -2.37344 | 6.133868 |
| Q9ESW8 | Pgpep1 | -2.37545 | 2.060578 |
| Q9WTR5 | Cdh13 | -2.37559 | 2.684027 |
| Q0VGY8 | Tanc1 | -2.37623 | 2.47811 |
| Q9D8Z1 | Ascc1 | -2.37868 | 2.049997 |
| Q60949 | Tbc1d1 | -2.37999 | 3.04594 |
| P50543 | S100a11 | -2.38055 | 4.847083 |
| E9QAM5 | Helz2 | -2.38338 | 3.468897 |
| P52633 | Stat6 | -2.38349 | 5.50729 |
| Q07243 | Mtf1 | -2.38492 | 2.10454 |
| Q8K298 | Anln | -2.38869 | 6.049262 |
| Q9CR16 | Ppid | -2.39191 | 6.116925 |
| Q8C181 | Mbnl2 | -2.39405 | 3.826167 |
| P49138 | Mapkapk2 | -2.39699 | 4.041025 |
| Q8R205 | Zc3h10 | -2.40111 | 2.996769 |
| Q3TC33 | Ccdc127 | -2.40565 | 2.272694 |
| Q8R5C5 | Actr1b | -2.4093 | 5.332619 |
| A2ACJ2 | Faap100 | -2.41117 | 3.675344 |
| A2AI08 | Tprn | -2.41131 | 2.742657 |
| P97360 | Etv6 | -2.41193 | 2.568858 |
| Q8BH97 | Rcn3 | -2.41201 | 3.603623 |
| Q99K82 | Smox | -2.41314 | 2.760579 |
| Q8VC70 | Rbms2 | -2.41361 | 3.865078 |
| Q8K2J7 | Rell1 | -2.4163 | 2.605047 |
| P21107 | Tpm3 | -2.42873 | 4.277831 |
| P31750 | Akt1 | -2.43033 | 4.746578 |
| Q9CPY3 | Cdca5 | -2.43167 | 2.129592 |
| Q9CXH7 | Sgo1 | -2.43257 | 2.508278 |
| P17751 | Tpi1 | -2.43376 | 5.598055 |
| Q9D142 | Nudt14 | -2.435 | 2.607844 |
| Q8VCS6 | Med9 | -2.43673 | 4.832328 |
| Q68FH4 | Galk2 | -2.43753 | 2.007662 |
| P58771 | Tpm1 | -2.43834 | 5.046283 |
| Q9CY50 | Ssr1 | -2.44085 | 2.205897 |
| Q9QUG2 | Polk | -2.44135 | 3.002596 |
| Q8K1C9 | Lrrc41 | -2.44459 | 2.528293 |
| P59222 | Scarf2 | -2.45239 | 2.959936 |
| Q8R0F3 | Sumf1 | -2.45632 | 3.866001 |
| Q8CCH7 | Zfpm2 | -2.4581 | 3.386517 |
| Q8BIA4 | Fbxw8 | -2.46358 | 3.064046 |
| Q99KW9 | Itfg1 | -2.46628 | 3.259195 |
| Q9CR75 | Tnfrsf12a | -2.46693 | 2.186944 |
| Q9WV32 | Arpc1b | -2.46768 | 6.446737 |
| P10518 | Alad | -2.46825 | 5.162718 |
| Q9CQA6 | Chchd1 | -2.46924 | 2.939366 |
| Q9WVJ9 | Efemp2 | -2.471 | 2.304948 |
| E9Q784 | Zc3h13 | -2.47657 | 2.511776 |
| Q9CXC3 | Mgme1 | -2.48555 | 2.57863 |
| P70227 | Itpr3 | -2.48601 | 2.255262 |
| Q80W68 | Kirrel1 | -2.48687 | 3.428443 |
| O88986 | Gcat | -2.48939 | 5.305289 |
| Q922Q1 | Mtarc2 | -2.49287 | 2.878955 |
| P70255 | Nfic | -2.49459 | 4.1756 |
| Q61127 | Nab2 | -2.49621 | 4.111456 |
| P39053 | Dnm1 | -2.49659 | 5.86571 |
| Q922F4 | Tubb6 | -2.49701 | 5.124298 |
| Q9WUB0 | Rbck1 | -2.49934 | 2.138012 |
| Q64437 | Adh7 | -2.50153 | 2.348573 |
| A2ADA5 | Pusl1 | -2.50334 | 2.097795 |
| Q91ZS8 | Adarb1 | -2.50573 | 3.538393 |
| O08553 | Dpysl2 | -2.51293 | 3.869893 |
| O35375 | **Nrp2** | -2.51377 | 2.276973 |
| Q9DD24 | Tceal9 | -2.51462 | 3.499356 |
| Q9R0X4 | Acot9 | -2.51548 | 5.885145 |
| P11688 | Itga5 | -2.51799 | 2.607844 |
| Q01705 | Notch1 | -2.52287 | 2.385758 |
| Q9CZS3 | Cep20 | -2.52724 | 2.304436 |
| Q8C804 | Spice1 | -2.52791 | 3.143039 |
| Q64521 | Gpd2 | -2.52918 | 5.25858 |
| Q80WB5 | Ntaq1 | -2.53135 | 2.441059 |
| P07214 | Sparc | -2.53149 | 5.298662 |
| Q07417 | Acads | -2.53571 | 5.699939 |
| P11679 | Krt8 | -2.53703 | 4.206023 |
| Q8BFW7 | Lpp | -2.53855 | 5.653371 |
| Q8R0S2 | Iqsec1 | -2.54439 | 2.988936 |
| Q3TGF2 | Fam107b | -2.54985 | 5.595097 |
| Q9Z1B7 | Mapk13 | -2.55356 | 2.979655 |
| Q9QY53 | Nphp1 | -2.55664 | 3.141431 |
| Q99LJ6 | Gpx7 | -2.55874 | 2.088198 |
| Q9WVL3 | Slc12a7 | -2.56018 | 3.281969 |
| Q99LB7 | Sardh | -2.56156 | 2.431782 |
| Q9CPY0 | Mrm2 | -2.56224 | 2.104477 |
| Q9CWY4 | Gemin7 | -2.56334 | 2.184946 |
| Q3UQ28 | Pxdn | -2.56348 | 2.411308 |
| Q61738 | Itga7 | -2.56409 | 3.248556 |
| Q9JL19 | Ncoa6 | -2.56571 | 4.556504 |
| Q8BZT9 | Lacc1 | -2.56672 | 4.302627 |
| Q9ERS5 | Plekha2 | -2.57274 | 2.356898 |
| P25322 | Ccnd1 | -2.57834 | 2.551114 |
| O54967 | Tnk2 | -2.588 | 2.436427 |
| Q9WVK4 | Ehd1 | -2.58907 | 6.074963 |
| Q9CPV1 | Ska1 | -2.58921 | 2.727626 |
| P58059 | Mrps21 | -2.59042 | 3.694255 |
| Q9CY21 | Bud23 | -2.592 | 2.37028 |
| O54791 | Maff | -2.59252 | 2.790823 |
| Q8BRM2 | Gorab | -2.59357 | 2.57878 |
| P09055 | Itgb1 | -2.59361 | 4.102305 |
| P53690 | Mmp14 | -2.596 | 2.341231 |
| Q6IRU2 | Tpm4 | -2.59702 | 4.755791 |
| Q8C9X6 | Epc1 | -2.59957 | 2.32816 |
| Q8BMB0 | Emsy | -2.60389 | 2.146423 |
| P41731 | Cd63 | -2.60446 | 2.231502 |
| O08553 | Dpysl2 | -2.60569 | 3.413402 |
| P26041 | Msn | -2.60737 | 5.937472 |
| Q640N1 | Aebp1 | -2.60905 | 2.048799 |
| Q9WTI7 | Myo1c | -2.61294 | 4.939704 |
| Q99K41 | Emilin1 | -2.62432 | 2.17804 |
| Q8K370 | Acad10 | -2.62451 | 2.06837 |
| Q9D0I6 | Wdsub1 | -2.62725 | 2.074484 |
| P22366 | Myd88 | -2.62829 | 4.05363 |
| Q7TPV4 | Mybbp1a | -2.63589 | 4.746578 |
| Q9CWT6 | Ddx28 | -2.63912 | 3.072113 |
| O89086 | Rbm3 | -2.65021 | 5.058244 |
| Q9D2R0 | Aacs | -2.65986 | 5.229648 |
| P27577 | Ets1 | -2.66125 | 2.761952 |
| Q8BYM8 | Cars2 | -2.67638 | 2.976892 |
| Q9DBR4 | Apbb2 | -2.67775 | 4.099644 |
| P62500 | Tsc22d1 | -2.67918 | 2.25983 |
| Q66GT5 | Ptpmt1 | -2.68109 | 2.763654 |
| Q9CQ91 | Ndufa3 | -2.68506 | 2.378187 |
| Q91YH5 | Atl3 | -2.68552 | 2.200394 |
| Q923K4 | Gtpbp3 | -2.68798 | 2.389833 |
| Q8CJ40 | Crocc | -2.69417 | 2.614034 |
| Q8K004 | Spata2 | -2.69627 | 3.173963 |
| Q3U1G5 | Isg20l2 | -2.69784 | 2.259595 |
| Q8K2B0 | P3h4 | -2.70059 | 2.083043 |
| P15806 | Tcf3 | -2.70102 | 4.024186 |
| P47738 | Aldh2 | -2.70251 | 5.248872 |
| Q8BP40 | Acp6 | -2.70425 | 3.468897 |
| Q6P5E8 | Dgkq | -2.70486 | 2.181812 |
| Q8K214 | Scmh1 | -2.70954 | 3.152048 |
| Q921E2 | Rab31 | -2.71144 | 2.0384 |
| O70325 | Gpx4 | -2.71307 | 4.85902 |
| Q8R5A3 | Apbb1ip | -2.7139 | 2.217547 |
| Q9CRW3 |  | -2.71434 | 2.202294 |
| P0C8B4 | Gon7 | -2.71823 | 4.541171 |
| Q99J08 | Sec14l2 | -2.71967 | 3.070586 |
| Q08093 | Cnn2 | -2.72341 | 5.595097 |
| O35126 | Atn1 | -2.73532 | 2.780257 |
| Q9CZB0 | Sdhc | -2.73602 | 2.077692 |
| Q3UIU2 | Ndufb6 | -2.7363 | 2.382934 |
| Q8VHT7 | Gtf3a | -2.73711 | 2.334333 |
| Q8R5A0 | Smyd2 | -2.74465 | 3.240257 |
| Q99MK8 | Grk2 | -2.74593 | 3.786223 |
| Q924Z4 | Cers2 | -2.74736 | 2.944483 |
| Q62266 | Sprr1a | -2.74829 | 4.082765 |
| P09450 | Junb | -2.75072 | 2.090633 |
| Q8JZS6 | N4bp2l2 | -2.752 | 2.329381 |
| Q8BR90 | Rimoc1 | -2.75344 | 3.596923 |
| Q8BZB2 | Ppcdc | -2.75806 | 2.461744 |
| Q8C163 | Exog | -2.76294 | 2.707736 |
| Q9CQQ0 | Smim8 | -2.76744 | 2.406729 |
| Q9DBM1 | Gpatch1 | -2.76866 | 2.836584 |
| Q9CU65 | Zmym2 | -2.77871 | 2.184579 |
| Q3U2K0 | Fam193b | -2.785 | 3.487278 |
| P21107 | Tpm3 | -2.7877 | 2.397627 |
| P43135 | Nr2f2 | -2.78932 | 2.982906 |
| Q8BKR5 | Ppp1r37 | -2.79223 | 2.267892 |
| Q8R086 | Suox | -2.79494 | 3.022103 |
| P56375 | Acyp2 | -2.80377 | 3.720648 |
| Q9Z0P4 | Palm | -2.8073 | 3.12123 |
| P18052 | Ptpra | -2.80982 | 2.878511 |
| Q6NXW6 | Rad17 | -2.81062 | 2.988371 |
| P49817 | Cav1 | -2.81103 | 2.592695 |
| O08734 | Bak1 | -2.81374 | 3.183466 |
| Q7TSH3 | Znf516 | -2.81417 | 2.026323 |
| Q5SSK3 | Tefm | -2.81501 | 3.591425 |
| Q6F3F9 | Adgrg6 | -2.81534 | 2.451855 |
| P28033 | Cebpb | -2.8157 | 2.892234 |
| Q3U829 | Ap5z1 | -2.8161 | 2.775681 |
| Q571F8 | Gls2 | -2.81759 | 2.888555 |
| P50429 | Arsb | -2.81765 | 2.727044 |
| P35569 | Irs1 | -2.82712 | 2.901018 |
| Q9D009 | Lipt2 | -2.83456 | 2.471597 |
| Q8C3X8 | Lmf2 | -2.83613 | 2.425297 |
| O70252 | Hmox2 | -2.84086 | 2.427726 |
| Q8CGB6 | Tns2 | -2.84482 | 2.176716 |
| O88939 | Zbtb7a | -2.84858 | 5.258686 |
| Q08874 | Mitf | -2.84859 | 2.372558 |
| Q924C6 | Loxl4 | -2.85792 | 2.464078 |
| Q99M15 | Pstpip2 | -2.85868 | 3.402536 |
| Q99JR5 | Tinagl1 | -2.86031 | 3.192753 |
| P97821 | Ctsc | -2.86479 | 2.713155 |
| O08539 | Bin1 | -2.86545 | 6.770926 |
| Q9QYF1 | Rdh11 | -2.86714 | 2.946037 |
| P70451 | Fer | -2.86837 | 2.154248 |
| Q80TA9 | Epg5 | -2.86981 | 2.227419 |
| Q99N20 | Brms1 | -2.87099 | 2.061808 |
| Q8CFI5 | Pars2 | -2.8724 | 2.279962 |
| Q8R080 | Gtse1 | -2.87359 | 4.055275 |
| Q5DTX6 | Jcad | -2.87878 | 4.166066 |
| Q75NR7 | Recql4 | -2.87916 | 2.346811 |
| P47740 | Aldh3a2 | -2.88714 | 3.178972 |
| Q8K371 | Amotl2 | -2.88952 | 2.418933 |
| Q8C0Z1 | Fam234a | -2.8947 | 3.344966 |
| P54761 | Ephb4 | -2.90279 | 2.32606 |
| Q91ZX7 | Lrp1 | -2.90501 | 4.053025 |
| Q9CZG3 | Commd8 | -2.9111 | 4.111033 |
| Q8BH04 | Pck2 | -2.913 | 4.099881 |
| Q8R2Y0 | Abhd6 | -2.91418 | 2.030805 |
| Q8R0F5 | Rbmx2 | -2.92032 | 3.872541 |
| P09925 | Surf1 | -2.92423 | 3.496476 |
| Q9CRY7 | Gdpd1 | -2.92565 | 2.132087 |
| Q8BJM3 | R3hcc1l | -2.9269 | 2.189351 |
| Q7TNE3 | Spag7 | -2.92717 | 2.894937 |
| Q920A7 | Afg3l1 | -2.92727 | 4.237734 |
| Q9QWR8 | Naga | -2.92826 | 3.979104 |
| Q8JZU0 | Nudt13 | -2.92882 | 2.066681 |
| A2A7S8 | Nhsl3 | -2.92979 | 3.349553 |
| O88196 | Ttc3 | -2.9309 | 3.020207 |
| Q99JZ7 | Errfi1 | -2.93652 | 3.333045 |
| Q9WV76 | Ap4b1 | -2.93861 | 2.255832 |
| Q8K1K4 | Cenpi | -2.94321 | 3.191884 |
| A2A6T1 | Cdr2l | -2.9439 | 3.015811 |
| Q8BHE0 | Prr11 | -2.94473 | 2.019101 |
| Q8BQ47 | Cnpy4 | -2.95024 | 4.086829 |
| Q91VT4 | Cbr4 | -2.95455 | 2.348943 |
| Q8VC57 | Kctd5 | -2.95953 | 3.188141 |
| Q78IK4 | Apool | -2.9598 | 3.305863 |
| Q8VHY0 | Cspg4 | -2.98081 | 2.652539 |
| Q3UW53 | Niban1 | -2.98348 | 2.828347 |
| O35954 | Pitpnm1 | -2.98461 | 2.464435 |
| Q6PDX6 | Rnf220 | -2.98846 | 4.031829 |
| Q9JHJ3 | Glmp | -2.99328 | 2.069518 |
| Q3URQ7 | Mthfsd | -2.99436 | 3.141566 |
| P01897 | H2-L | -2.99474 | 2.525941 |
| Q7TSJ2 | Map6 | -2.99821 | 2.334333 |
| Q8K2J0 | Plcd3 | -2.99891 | 2.099097 |
| Q9CZT5 | Vasn | -3.00186 | 2.54218 |
| Q3UYI5 | Rgl3 | -3.01145 | 3.438756 |
| P58468 | Slx9 | -3.01944 | 4.46472 |
| Q9ET22 | Dpp7 | -3.02412 | 4.910096 |
| Q9QXS1 | Plec | -3.02437 | 6.120043 |
| Q499E4 | Dzip1l | -3.02675 | 2.624809 |
| Q99L00 | Haus8 | -3.02726 | 3.003093 |
| Q921Y4 | Mfsd5 | -3.02971 | 4.987169 |
| Q9D937 |  | -3.03539 | 3.749841 |
| Q91YI0 | Asl | -3.04027 | 5.485443 |
| Q9D9M5 | Phospho2 | -3.04133 | 2.492796 |
| P49935 | Ctsh | -3.04335 | 2.707378 |
| P48410 | Abcd1 | -3.05155 | 4.459395 |
| Q80TZ3 | Dnajc6 | -3.05351 | 3.667684 |
| D0QMC3 | Mndal | -3.05506 | 2.707902 |
| Q810S1 | Mcub | -3.05708 | 2.463599 |
| Q3TBT3 | Sting1 | -3.05774 | 2.381723 |
| A2AI05 | Ndor1 | -3.0609 | 2.30665 |
| Q8BMA5 | Npat | -3.06111 | 2.560872 |
| Q8K215 | Lyrm4 | -3.06953 | 2.208179 |
| P56542 | Dnase2 | -3.07019 | 3.001863 |
| Q8R550 | Sh3kbp1 | -3.07394 | 4.738661 |
| Q99MR1 | Gigyf1 | -3.07684 | 2.918651 |
| A0A7N9VSG0 | Afg2b | -3.07696 | 2.466429 |
| Q64337 | Sqstm1 | -3.07699 | 6.120043 |
| B7ZNG4 | Troap | -3.08243 | 2.695327 |
| Q9D8S3 | Arfgap3 | -3.08435 | 2.176181 |
| Q60695 | Rgl1 | -3.08466 | 2.229317 |
| P02340 | Tp53 | -3.08565 | 3.597183 |
| Q9CY62 | Rnf181 | -3.09123 | 3.647032 |
| P08074 | Cbr2 | -3.09301 | 2.390447 |
| Q9CR59 | Gadd45gip1 | -3.09783 | 2.656275 |
| P70671 | Irf3 | -3.10321 | 3.365772 |
| Q9JK92 | Hspb8 | -3.10439 | 3.002739 |
| Q8K1J5 | Sde2 | -3.1044 | 3.299646 |
| Q5NC05 | Ttf2 | -3.11237 | 3.704372 |
| Q8BZ20 | Parp12 | -3.11473 | 2.101177 |
| P22935 | Crabp2 | -3.11713 | 5.214901 |
| Q60I26 | Als2cl | -3.11937 | 2.905001 |
| Q8CHQ0 | Fbxo4 | -3.12353 | 3.379827 |
| Q61292 | Lamb2 | -3.12546 | 3.821882 |
| Q8R2Q8 | Bst2 | -3.12834 | 2.545219 |
| Q3V1H1 | Ckap2 | -3.12989 | 3.521311 |
| Q9D3P8 | Plgrkt | -3.13114 | 4.566741 |
| Q9CRC3 |  | -3.14273 | 2.282632 |
| Q8BTM8 | Flna | -3.14518 | 4.254675 |
| Q91WC9 | Daglb | -3.14958 | 2.136785 |
| A2AUY4 | Baz2b | -3.15068 | 3.829821 |
| Q99J79 | Ddb2 | -3.15981 | 3.191359 |
| Q3TW96 | Uap1l1 | -3.1646 | 4.687421 |
| Q8R3K3 | Ptcd2 | -3.16483 | 3.339316 |
| Q8K039 |  | -3.16493 | 3.294153 |
| Q8BIW1 | Prune1 | -3.16549 | 2.732923 |
| Q80TS3 | Adgrl3 | -3.16998 | 2.119785 |
| Q91W61 | Fbxl15 | -3.17038 | 3.438821 |
| Q91WS0 | Cisd1 | -3.17554 | 2.411359 |
| Q9WUQ2 | Preb | -3.17708 | 2.697036 |
| Q6PFD6 | Kif18b | -3.17778 | 2.436584 |
| Q6A058 | Armcx2 | -3.18127 | 2.514039 |
| Q8C854 | Myef2 | -3.18152 | 3.622129 |
| P29391 | Ftl1 | -3.19016 | 3.416451 |
| Q8K387 | Usp45 | -3.19179 | 2.482957 |
| Q8VCM4 | Lipt1 | -3.19687 | 2.761952 |
| Q9JHE7 | Tssc4 | -3.20501 | 3.271656 |
| Q3UHQ6 | Dop1b | -3.20792 | 2.201864 |
| Q8R2Y2 | Mcam | -3.21016 | 3.000127 |
| Q8VEH5 | Epm2aip1 | -3.21084 | 2.775681 |
| Q9CX53 | Gemin6 | -3.21155 | 2.343904 |
| Q9D2G5 | Synj2 | -3.21409 | 2.139608 |
| O88207 | Col5a1 | -3.21547 | 2.231502 |
| Q9CR70 | Lage3 | -3.21975 | 4.763898 |
| Q8VCP8 | Ak6 | -3.22305 | 2.570798 |
| Q9CQY2 | Ramac | -3.23 | 3.958628 |
| Q8C5P5 | Nt5dc1 | -3.23223 | 5.55166 |
| P40630 | Tfam | -3.23295 | 2.503145 |
| Q8R344 | Ccdc12 | -3.24096 | 3.240257 |
| Q8VI33 | Taf9 | -3.24703 | 2.151952 |
| E9Q9R9 | Dlg5 | -3.2536 | 3.580778 |
| Q9CQJ7 | Pttg1 | -3.25809 | 3.03 |
| Q8BLY7 | Hps6 | -3.26486 | 3.60109 |
| Q8CBY0 | Gatc | -3.26716 | 2.603111 |
| Q9WVL0 | Gstz1 | -3.26837 | 2.418933 |
| Q9CQZ6 | Ndufb3 | -3.27142 | 2.599089 |
| Q8BTI9 | Pik3cb | -3.27193 | 2.040238 |
| Q9Z0Z3 | Skp2 | -3.27763 | 2.361066 |
| Q9D281 | Fam114a1 | -3.28025 | 2.898422 |
| Q9D8T2 | Gsdmd | -3.2854 | 2.001641 |
| P48678 | Lmna | -3.2874 | 6.45768 |
| P10605 | Ctsb | -3.28839 | 3.961951 |
| O88824 | Jtb | -3.29047 | 2.609994 |
| Q8R4E9 | Cdt1 | -3.2909 | 3.24856 |
| Q60872 | Eif1a | -3.29655 | 3.250722 |
| P59110 | Senp1 | -3.29716 | 2.986085 |
| Q9CQJ8 | Ndufb9 | -3.29778 | 3.100342 |
| P29533 | Vcam1 | -3.29909 | 2.122483 |
| P85094 | Isoc2a | -3.30621 | 3.729899 |
| D3YZG8 | Mthfd2l | -3.31267 | 3.063354 |
| Q8VCW8 | Acsf2 | -3.32187 | 3.333045 |
| Q62086 | Pon2 | -3.32352 | 2.660965 |
| O89023 | Tpp1 | -3.33312 | 2.176081 |
| Q9DC71 | Mrps15 | -3.33684 | 4.182353 |
| Q91XC0 | Ajuba | -3.33765 | 3.03395 |
| Q9CX48 | Zcchc10 | -3.33871 | 2.142391 |
| Q62172 | Ralbp1 | -3.34199 | 2.329406 |
| Q9CPT4 | Mydgf | -3.34332 | 3.669561 |
| Q8BHW2 | Oscp1 | -3.34382 | 2.020179 |
| Q3TVC7 | Ccndbp1 | -3.35257 | 2.514277 |
| Q9CX66 | Nopchap1 | -3.35804 | 2.674595 |
| Q80TT8 | Cul9 | -3.36955 | 2.233342 |
| P97864 | Casp7 | -3.3717 | 2.511198 |
| Q8BGD8 | Coa6 | -3.37263 | 4.164252 |
| Q9CWY3 | Setd6 | -3.37378 | 2.144783 |
| Q8BYH7 | Tbc1d17 | -3.37381 | 2.549077 |
| Q9CR25 | Dph2 | -3.37799 | 4.641197 |
| Q80YR6 | Rbbp8 | -3.38243 | 2.007376 |
| Q9WTK5 | Nfkb2 | -3.38815 | 5.229648 |
| P98063 | Bmp1 | -3.38818 | 2.141733 |
| P19157 | Gstp1 | -3.3935 | 2.309368 |
| Q8C0J6 | Sowahc | -3.39475 | 2.674595 |
| P97783 | Mllt11 | -3.4028 | 2.437323 |
| Q3U962 | Col5a2 | -3.40421 | 2.465043 |
| P46656 | Fdx1 | -3.41935 | 2.996769 |
| Q9DCS2 | Mettl26 | -3.42126 | 4.552875 |
| Q99PL6 | Ubxn6 | -3.42541 | 3.230228 |
| Q9DCA2 | Mrps11 | -3.4344 | 2.888655 |
| P28653 | Bgn | -3.43529 | 3.772642 |
| Q64701 | Rbl1 | -3.43618 | 2.091314 |
| Q9QYR9 | Acot2 | -3.43703 | 3.973149 |
| Q80Z25 | Ofd1 | -3.44439 | 4.019368 |
| Q61602 | Gli3 | -3.44515 | 2.09122 |
| Q9CQC7 | Ndufb4 | -3.44573 | 2.652517 |
| Q9QZM4 | Tnfrsf10b | -3.4494 | 2.741695 |
| Q9CRA4 | Msmo1 | -3.44991 | 3.304141 |
| O35405 | Pld3 | -3.45139 | 3.674948 |
| Q9CXX9 | Cuedc2 | -3.45569 | 2.004831 |
| Q8C3S2 | Tango6 | -3.46673 | 2.081656 |
| Q99LJ7 | Rcbtb2 | -3.46767 | 2.02911 |
| Q9Z2H5 | Epb41l1 | -3.46832 | 2.966477 |
| E9Q0S6 | Tns1 | -3.47189 | 2.534705 |
| Q9CWX2 | Ndufaf1 | -3.47268 | 4.943475 |
| P0DOV1 | Ifi211 | -3.47365 | 2.601709 |
| P13020 | Gsn | -3.47508 | 5.687571 |
| Q8R0W0 | Eppk1 | -3.47983 | 6.156344 |
| Q9D773 | Mrpl2 | -3.48551 | 2.803566 |
| Q80XL6 | Acad11 | -3.49536 | 2.987994 |
| P63013 | Prrx1 | -3.49574 | 2.820027 |
| Q63918 | Cavin2 | -3.50942 | 5.76799 |
| Q9D8C4 | Ifi35 | -3.50969 | 2.51919 |
| Q9EPR5 | Sorcs2 | -3.52107 | 2.122843 |
| P30412 | Ppic | -3.52154 | 2.084551 |
| Q5SUQ9 | Ctc1 | -3.52364 | 4.695251 |
| Q8R3P0 | Aspa | -3.52926 | 2.069509 |
| P01897 | H2-L | -3.53995 | 4.202449 |
| Q9WV91 | Ptgfrn | -3.54299 | 2.827398 |
| Q8CIK8 | Rfwd3 | -3.54456 | 2.944296 |
| Q3UHA3 | Spg11 | -3.54987 | 2.195827 |
| Q9D853 | Eef1akmt2 | -3.55007 | 2.301082 |
| Q6NXJ0 | Wwc2 | -3.55158 | 3.107847 |
| P35288 | Rab23 | -3.55514 | 2.911283 |
| Q8CBY1 | Samd4a | -3.55548 | 3.376284 |
| Q8BGV4 | Tti2 | -3.561 | 2.584271 |
| Q8C6I2 | Sdhaf2 | -3.56507 | 2.219549 |
| Q14AI6 | Rpusd3 | -3.56558 | 3.162683 |
| P97302 | Bach1 | -3.5656 | 2.036894 |
| Q9D842 | Aplf | -3.57061 | 3.691988 |
| Q99PG2 | Ogfr | -3.58346 | 4.919042 |
| Q8C551 | Rad51ap1 | -3.58444 | 2.366985 |
| Q8CC35 | Synpo | -3.58499 | 3.622986 |
| Q80UU2 | Rpp38 | -3.58893 | 3.468897 |
| O35988 | Sdc4 | -3.60141 | 2.497849 |
| P45376 | Akr1b1 | -3.61071 | 2.025357 |
| Q8C2B3 | Hdac7 | -3.61276 | 2.755259 |
| Q71FD7 | Fblim1 | -3.61775 | 2.0802 |
| Q9CWP6 | Mospd2 | -3.62192 | 3.604573 |
| Q78HU3 | Mvb12a | -3.62272 | 3.572488 |
| P49817 | Cav1 | -3.62333 | 2.962208 |
| Q9DCZ1 | Gmpr | -3.62334 | 2.758694 |
| Q8VC34 | Rpap2 | -3.62654 | 3.423508 |
| Q7TT23 | Dnaaf9 | -3.6275 | 3.443867 |
| O55101 | Syngr2 | -3.63811 | 3.499356 |
| P01897 | H2-L | -3.64021 | 3.841886 |
| P0DPD9 | Eef1akmt4-Ece2 | -3.64241 | 2.582721 |
| Q9CZ09 | Mettl18 | -3.64289 | 3.133586 |
| P70271 | Pdlim4 | -3.64389 | 5.079062 |
| Q8R4N0 | Clybl | -3.64508 | 2.574995 |
| P05480 | Src | -3.64537 | 2.172975 |
| Q9CR02 | Tma16 | -3.6466 | 2.525909 |
| Q8K4R9 | Dlgap5 | -3.65247 | 3.332852 |
| Q8CE46 | Pus7l | -3.65575 | 2.37907 |
| Q6PGG2 | Gmip | -3.65763 | 2.571701 |
| Q6NSR8 | Npepl1 | -3.65888 | 2.128623 |
| P52624 | Upp1 | -3.6636 | 2.862669 |
| Q8BXA1 | Golim4 | -3.66838 | 2.505493 |
| P28650 | Adss1 | -3.6799 | 2.518269 |
| Q08775 | Runx2 | -3.68149 | 3.174296 |
| P59017 | Bcl2l13 | -3.69263 | 5.712944 |
| Q8BL80 | Arhgap22 | -3.69277 | 4.073142 |
| Q8CIC2 | Nup42 | -3.69545 | 2.356898 |
| Q8C1M2 | Znf428 | -3.70162 | 5.771121 |
| Q9CZX7 | Pip4p2 | -3.70186 | 2.299287 |
| Q9D727 | Pex39 | -3.7067 | 2.538668 |
| Q7TQ95 | Lnpk | -3.71001 | 3.667684 |
| Q8K203 | Neil3 | -3.71075 | 2.614376 |
| Q9DCT8 | Crip2 | -3.71453 | 3.499974 |
| Q91UZ5 | Impa2 | -3.71658 | 2.246056 |
| Q8VE38 | Oxnad1 | -3.72351 | 2.66156 |
| P47955 | Rplp1 | -3.72354 | 5.005524 |
| Q9D6Y7 | Msra | -3.72556 | 3.211195 |
| P81269 | Atf1 | -3.73192 | 3.674948 |
| Q9ESY9 | Ifi30 | -3.73383 | 3.291166 |
| O70161 | Pip5k1c | -3.7374 | 2.859569 |
| Q9CQZ5 | Ndufa6 | -3.74097 | 3.297778 |
| Q9EPB5 | Serhl | -3.74307 | 3.93564 |
| Q8BHA0 | Ino80c | -3.74321 | 4.029912 |
| P62748 | Hpcal1 | -3.74448 | 2.342594 |
| O88512 | Ap1g2 | -3.74682 | 2.259409 |
| Q924T3 | Xrcc4 | -3.75055 | 4.57739 |
| Q9D845 | Tex9 | -3.75424 | 2.576976 |
| Q9D2L9 | Fam111a | -3.75447 | 2.283605 |
| Q921Q7 | Rin1 | -3.75564 | 2.462694 |
| Q7TMC8 | Fcsk | -3.76525 | 2.090633 |
| Q9Z0H8 | Clip2 | -3.76618 | 4.22819 |
| Q8BMI4 | Gen1 | -3.76638 | 3.569577 |
| Q6ZPG2 | Wdr90 | -3.76672 | 2.146902 |
| P47930 | Fosl2 | -3.76852 | 2.807632 |
| P56213 | Gfer | -3.77492 | 3.559427 |
| Q8CES0 | Naa30 | -3.7763 | 2.13123 |
| Q9JJ89 | Ccdc86 | -3.77823 | 2.198636 |
| P46935 | Nedd4 | -3.78061 | 5.325391 |
| P20060 | Hexb | -3.78187 | 2.868872 |
| Q61037 | Tsc2 | -3.78365 | 4.073272 |
| Q9CZX5 | Pinx1 | -3.78537 | 3.063354 |
| Q9DCI9 | Mrpl32 | -3.78834 | 3.295072 |
| P70677 | Casp3 | -3.79112 | 6.770926 |
| Q64669 | Nqo1 | -3.79963 | 4.166066 |
| Q8BW00 | Ptrh1 | -3.80207 | 5.640145 |
| P02802 | Mt1 | -3.80684 | 3.56091 |
| Q9Z223 | Mocs2 | -3.80796 | 2.825486 |
| P70213 | Fv1 | -3.80868 | 2.187814 |
| Q8K4E0 | Alms1 | -3.81607 | 2.814099 |
| Q3UX61 | Naa11 | -3.81688 | 2.027506 |
| Q8BK75 | Elp6 | -3.81983 | 2.348715 |
| Q9Z0M5 | Lipa | -3.82616 | 3.167225 |
| Q3TV70 | Nr2c2ap | -3.82791 | 2.0587 |
| Q8C796 | Rcor2 | -3.82827 | 3.986447 |
| Q9DBE8 | Alg2 | -3.82902 | 2.942529 |
| Q99JV5 | Stard4 | -3.8304 | 2.77079 |
| Q9Z2Q2 | Knop1 | -3.83158 | 3.165716 |
| Q8BZA9 | Tigar | -3.83226 | 3.82503 |
| Q6AW69 | Cgnl1 | -3.83479 | 2.67221 |
| Q9D6H2 | Ift25 | -3.84713 | 2.312706 |
| Q9CWH5 | Trmt11 | -3.84835 | 3.753311 |
| O08908 | Pik3r2 | -3.86226 | 4.746578 |
| Q6PG16 | Hjurp | -3.87078 | 2.089666 |
| Q9DBE0 | Csad | -3.87749 | 3.494297 |
| P70193 | Lrig1 | -3.87781 | 2.011579 |
| Q8R3F5 | Mcat | -3.87864 | 2.368473 |
| P12265 | Gusb | -3.8877 | 2.439887 |
| Q8CG19 | Ltbp1 | -3.90166 | 3.295499 |
| P68368 | Tuba4a | -3.90334 | 5.50729 |
| Q91ZF0 | Dnajc24 | -3.90354 | 3.457574 |
| Q3U6N9 |  | -3.91294 | 2.033649 |
| Q8K1I7 | Wipf1 | -3.91848 | 2.883424 |
| Q8CIV8 | Tbce | -3.91998 | 4.746578 |
| Q80V94 | Ap4e1 | -3.92039 | 2.872895 |
| Q9QX60 | Dguok | -3.92105 | 3.422187 |
| Q9CPW3 | Mrpl54 | -3.92233 | 3.485936 |
| Q3U7U3 | Fbxo7 | -3.92878 | 3.027216 |
| Q9CQP3 | Chchd5 | -3.92946 | 3.045681 |
| Q3UGP9 | Lrrc58 | -3.94322 | 2.710081 |
| P46935 | Nedd4 | -3.94465 | 6.010857 |
| Q6PAL7 | Ahdc1 | -3.94968 | 2.898487 |
| Q8VHK1 | Caskin2 | -3.94983 | 2.025357 |
| P48432 | Sox2 | -3.95524 | 2.933424 |
| Q61263 | Soat1 | -3.96335 | 2.727626 |
| Q00493 | Cpe | -3.96435 | 5.364449 |
| Q8BK30 | Ndufv3 | -3.96636 | 2.766285 |
| Q8VC19 | Alas1 | -3.97111 | 2.399119 |
| P29351 | Ptpn6 | -3.97484 | 2.294535 |
| Q9CX60 | Lbh | -3.97585 | 2.337157 |
| Q8R3F9 | Tut1 | -3.9787 | 2.868133 |
| A6PWY4 | Wdr76 | -3.98433 | 2.946333 |
| P0DJF2 | Pet117 | -3.98678 | 2.881955 |
| P58058 | Nadk | -3.98719 | 3.926334 |
| P97352 | S100a13 | -3.9893 | 5.324351 |
| Q8C263 | Ska3 | -3.99381 | 2.923639 |
| P35762 | Cd81 | -3.99401 | 2.049997 |
| Q9CQB2 | Mcrip2 | -3.99675 | 2.625431 |
| Q9CQU5 | Zwint | -4.00562 | 3.946362 |
| Q64364 | Cdkn2a | -4.01066 | 3.398939 |
| Q99M04 | Lias | -4.01552 | 2.871967 |
| P19783 | Cox4i1 | -4.01984 | 4.428869 |
| Q9CW79 | Golga1 | -4.02236 | 2.036548 |
| Q99MZ7 | Pecr | -4.02434 | 4.746578 |
| Q8C761 | Dync2i1 | -4.03787 | 4.117235 |
| Q921S7 | Mrpl37 | -4.04333 | 3.265529 |
| O88667 | Rrad | -4.04773 | 2.081618 |
| Q8BYY4 | Ttc39b | -4.04783 | 3.254486 |
| P10649 | Gstm1 | -4.05082 | 4.116592 |
| Q8VHX6 | Flnc | -4.05306 | 6.770926 |
| Q8C3R1 | Brat1 | -4.05382 | 3.629635 |
| Q99JP4 | Cdc26 | -4.05502 | 2.802165 |
| P48453 | Ppp3cb | -4.05674 | 3.697294 |
| Q8CJ26 | Nradd | -4.06544 | 3.304497 |
| Q922G2 | Fam76a | -4.06689 | 2.29258 |
| Q62187 | Ttf1 | -4.072 | 2.285943 |
| Q61510 | Trim25 | -4.08139 | 3.174574 |
| A2AG58 | Bclaf3 | -4.08183 | 2.190381 |
| Q99PP9 | Trim16 | -4.08369 | 2.456457 |
| Q8R0X7 | Sgpl1 | -4.08517 | 2.980106 |
| Q60855 | Ripk1 | -4.08919 | 4.620493 |
| Q8BXN9 | Tmem87a | -4.0902 | 2.093281 |
| Q99P69 | Nuf2 | -4.09138 | 2.689247 |
| Q9EQN3 | Tsc22d4 | -4.09138 | 4.855585 |
| P21460 | Cst3 | -4.10406 | 3.294153 |
| Q6GQW0 | Abtb3 | -4.11318 | 3.514056 |
| P70444 | Bid | -4.13477 | 3.59257 |
| Q8BFS6 | Cpped1 | -4.14163 | 3.464251 |
| Q8CDJ8 | Ston1 | -4.14933 | 2.394683 |
| Q8BVA5 | Ldah | -4.14971 | 3.058699 |
| Q9DCH2 | Pop7 | -4.16354 | 2.348458 |
| P08228 | Sod1 | -4.17213 | 2.709449 |
| Q9R008 | Mvk | -4.17216 | 2.271258 |
| P97863 | Nfib | -4.17915 | 2.523641 |
| O35640 | Anxa8 | -4.18603 | 2.403721 |
| Q8BKT8 | Haus7 | -4.18839 | 3.372791 |
| Q8VCN5 | Cth | -4.19265 | 3.559605 |
| Q99JP6 | Homer3 | -4.19562 | 3.879038 |
| Q8R164 | Bphl | -4.20073 | 5.126307 |
| Q9WU79 | Prodh | -4.20697 | 2.397253 |
| P26645 | Marcks | -4.209 | 5.430171 |
| Q99L04 | Dhrs1 | -4.21515 | 4.603959 |
| D0QMC3 | Mndal | -4.21651 | 2.152186 |
| Q9JLR9 | Higd1a | -4.21902 | 3.580778 |
| Q8BYU6 | Tor1aip2 | -4.23682 | 2.381235 |
| P07356 | Anxa2 | -4.24193 | 4.440791 |
| Q6PAT0 | Adat3 | -4.24259 | 2.853667 |
| Q8VDP3 | Mical1 | -4.25038 | 2.681647 |
| O70348 | Dxo | -4.2597 | 2.795516 |
| Q9CQ54 | Ndufc2 | -4.26732 | 2.31869 |
| Q61036 | Pak3 | -4.2684 | 3.763065 |
| Q8BK58 | Hspbap1 | -4.27464 | 2.339849 |
| Q9D1C3 | Pyurf | -4.28843 | 3.84971 |
| B1ARD8 | Slfn8 | -4.28905 | 3.826167 |
| Q9CQZ1 | Hsbp1 | -4.29139 | 5.332619 |
| Q60778 | Nfkbib | -4.3062 | 4.206443 |
| Q8BHA3 | Dtd2 | -4.30721 | 4.858477 |
| Q7TME2 | Spag5 | -4.30829 | 3.611515 |
| P97370 | Atp1b3 | -4.32166 | 2.498166 |
| Q8K1S3 | Unc5b | -4.32882 | 2.747181 |
| Q8VCH8 | Ubxn4 | -4.33156 | 3.752166 |
| Q8CD10 | Micu2 | -4.3347 | 3.723605 |
| Q9CQ06 | Mrpl24 | -4.33675 | 3.609849 |
| P56183 | Rrp1 | -4.33837 | 3.229957 |
| Q9CWV0 | Malsu1 | -4.34074 | 3.344663 |
| Q80ZQ9 | Abitram | -4.37195 | 4.764086 |
| Q8BMD8 | Slc25a24 | -4.37207 | 2.613694 |
| Q99MS8 | Tpgs1 | -4.37307 | 2.736592 |
| P25085 | Il1rn | -4.3792 | 2.793617 |
| Q6NXY1 | Tbc1d31 | -4.38944 | 4.037387 |
| P0DOV1 | Ifi211 | -4.3899 | 2.370504 |
| Q9D2Q3 | Paat | -4.39581 | 2.983037 |
| Q60772 | Cdkn2c | -4.40046 | 3.468894 |
| Q8VC52 | Rbpms2 | -4.40853 | 2.964668 |
| Q99J47 | Dhrs7b | -4.41511 | 2.811009 |
| Q8BFQ9 | Klhl42 | -4.42011 | 2.418933 |
| P97465 | Dok1 | -4.42567 | 2.66001 |
| Q9ESP1 | Sdf2l1 | -4.42647 | 3.885866 |
| Q91XV3 | Basp1 | -4.42802 | 2.725472 |
| Q3TZX8 | Nol9 | -4.433 | 2.231502 |
| P59759 | Mrtfb | -4.45071 | 3.284501 |
| Q80WT5 | Aftph | -4.46149 | 2.329406 |
| P12032 | Timp1 | -4.46948 | 4.216847 |
| P28798 | Grn | -4.47031 | 2.614376 |
| Q8CEE6 | Pask | -4.48065 | 3.229986 |
| Q8R5F7 | Ifih1 | -4.4979 | 3.022103 |
| Q9Z0F6 | Rad9a | -4.4998 | 2.275935 |
| P49962 | Srp9 | -4.50381 | 4.082303 |
| E1U8D0 | Mtcl2 | -4.50488 | 2.578247 |
| P57722 | Pcbp3 | -4.5141 | 4.017741 |
| A2ALU4 | Shroom2 | -4.51584 | 3.363006 |
| Q9CR89 | Ergic2 | -4.5238 | 2.962938 |
| Q64008 | Rab34 | -4.52899 | 3.845465 |
| Q3TUH1 | Tamm41 | -4.53501 | 3.468897 |
| Q3UA16 | Spc25 | -4.53758 | 2.111297 |
| Q61508 | Ecm1 | -4.55759 | 2.514504 |
| Q8R570 | Snap47 | -4.56296 | 2.643963 |
| Q811L6 | Mast4 | -4.56879 | 2.814099 |
| Q3ULW8 | Parp3 | -4.57186 | 2.706785 |
| Q9WV54 | Asah1 | -4.57197 | 2.620533 |
| P43406 | Itgav | -4.57582 | 3.91255 |
| Q8BX02 | Kank2 | -4.60001 | 2.217461 |
| A2AQ07 | Tubb1 | -4.60314 | 2.250282 |
| Q9CQ62 | Decr1 | -4.60906 | 2.154682 |
| Q99JN2 | Klhl22 | -4.62239 | 3.666889 |
| P70255 | Nfic | -4.626 | 3.303834 |
| Q9QZM2 | Polg2 | -4.63154 | 3.787995 |
| P20065 | Tmsb4x | -4.63405 | 5.947495 |
| Q9D1L0 | Chchd2 | -4.63539 | 3.677793 |
| Q60870 | Reep5 | -4.64292 | 3.032918 |
| Q8K4M5 | Commd1 | -4.64375 | 2.594817 |
| Q60953 | Pml | -4.65355 | 3.85918 |
| Q3V4B5 | Commd6 | -4.65402 | 2.446184 |
| Q80UW2 | Fbxo2 | -4.65783 | 2.273497 |
| Q5PSV9 | Mdc1 | -4.66161 | 3.130566 |
| Q9D7N6 | Mrpl30 | -4.66873 | 2.926515 |
| Q9DB29 | Iah1 | -4.68053 | 2.644253 |
| Q8C142 | Ldlrap1 | -4.68657 | 2.974404 |
| Q3UGC7 | Eif3j1 | -4.68749 | 3.71034 |
| P35951 | Ldlr | -4.68822 | 2.574072 |
| Q9CQ75 | Ndufa2 | -4.69671 | 2.582721 |
| P16675 | Ctsa | -4.70175 | 4.428195 |
| P48755 | Fosl1 | -4.70235 | 4.550247 |
| Q8N9S3 | Ahsa2 | -4.74212 | 2.346014 |
| Q9QWF0 | Chaf1a | -4.74683 | 3.186081 |
| Q78WZ7 | Polr1f | -4.74828 | 4.037387 |
| Q99LY9 | Ndufs5 | -4.74993 | 2.564685 |
| Q8C0T5 | Sipa1l1 | -4.76126 | 2.352015 |
| B1AR13 | Cisd3 | -4.76564 | 2.551784 |
| Q80WR5 |  | -4.77321 | 2.868872 |
| Q99N87 | Mrps5 | -4.77371 | 3.372488 |
| P14069 | S100a6 | -4.77391 | 2.979489 |
| Q61398 | Pcolce | -4.77816 | 4.603934 |
| Q9QZF2 | Gpc1 | -4.77822 | 3.248556 |
| P0DOV1 | Ifi211 | -4.77935 | 3.958628 |
| Q9Z127 | Slc7a5 | -4.78602 | 3.438821 |
| Q8K3D3 | Swi5 | -4.80356 | 3.813454 |
| P50428 | Arsa | -4.80938 | 2.806642 |
| Q8R1F6 | Hid1 | -4.82154 | 4.566741 |
| Q9CPV5 | Pmf1 | -4.8277 | 2.860741 |
| Q8BP78 | Fra10ac1 | -4.8393 | 4.34572 |
| Q9DCS3 | Mecr | -4.84088 | 5.598055 |
| Q99KS2 | Ngrn | -4.84293 | 2.898422 |
| O54724 | Cavin1 | -4.85391 | 2.844493 |
| O55137 | Acot1 | -4.8577 | 2.921534 |
| Q3UZA1 | Rcsd1 | -4.86128 | 2.551596 |
| Q9R112 | Sqor | -4.86134 | 4.263849 |
| Q8R1I1 | Uqcr10 | -4.86136 | 2.507259 |
| Q9D7E3 | Ovca2 | -4.88169 | 2.779242 |
| Q8C650 | Septin10 | -4.90885 | 2.159258 |
| Q76KJ5 | Polr1g | -4.9198 | 2.101035 |
| Q5BU09 | Eapp | -4.93192 | 4.647099 |
| Q8BTE0 | Sdhaf4 | -4.93811 | 2.97066 |
| Q3TQQ9 | Firrm | -4.94678 | 2.187119 |
| P40240 | Cd9 | -4.95517 | 2.63298 |
| Q9D8U0 | Ifrd2 | -4.95943 | 2.088297 |
| Q9D8S9 | Bola1 | -4.97247 | 2.568541 |
| Q8BQ30 | Ppp1r18 | -4.97761 | 4.025145 |
| Q6Q899 | Rigi | -4.97789 | 2.872896 |
| Q99LW0 | Ankrd10 | -4.98035 | 3.144964 |
| Q8BLH7 | Hirip3 | -4.9865 | 2.167049 |
| P43883 | Plin2 | -4.98861 | 3.412923 |
| Q60767 | Ly75 | -5.00519 | 2.190804 |
| Q8K1C0 | Angel2 | -5.01711 | 2.964092 |
| Q8BGX2 | Timm29 | -5.0189 | 3.341607 |
| Q61733 | Mrps31 | -5.01924 | 2.61745 |
| Q69ZN7 | Myof | -5.01962 | 5.395106 |
| Q8K2M0 | Mrpl38 | -5.03342 | 2.817213 |
| P54923 | Adprh | -5.03402 | 3.821882 |
| Q91YR9 | Ptgr1 | -5.03518 | 2.838117 |
| Q8BSL7 | Arf2 | -5.0371 | 3.18618 |
| Q6P3Y5 | Znf280c | -5.04197 | 4.617484 |
| Q9CWG8 | Ndufaf7 | -5.04438 | 3.339644 |
| Q499E6 | Airim | -5.04908 | 2.221691 |
| Q9DAZ9 | Zfyve19 | -5.05762 | 2.682922 |
| Q69ZZ9 | Macf1 | -5.07712 | 4.298654 |
| Q61468 | Msln | -5.08269 | 2.290001 |
| Q14AI0 | DSCC1 | -5.09241 | 2.054056 |
| Q9D945 | Llph | -5.09272 | 2.755222 |
| Q9R0X4 | Acot9 | -5.09574 | 2.939582 |
| Q791N7 | Polr1h | -5.10314 | 2.083043 |
| Q8R151 | Znfx1 | -5.10701 | 2.084849 |
| Q8K4F5 | Abhd11 | -5.11348 | 2.91218 |
| P62965 | Crabp1 | -5.16843 | 4.11947 |
| Q6SKR2 | Hemk2 | -5.18077 | 3.557568 |
| Q91W92 | Cdc42ep1 | -5.18586 | 2.578247 |
| Q9R118 | Htra1 | -5.18698 | 3.066585 |
| Q9D6U8 | Fam162a | -5.2291 | 2.097029 |
| Q99K30 | Eps8l2 | -5.23009 | 3.1467 |
| Q91V61 | Sfxn3 | -5.24158 | 2.681259 |
| Q8C3F2 | Fam120c | -5.25131 | 3.579449 |
| Q80TM6 | R3hdm2 | -5.28736 | 2.584649 |
| Q8BHL4 | Gprc5a | -5.29457 | 3.466734 |
| P10649 | Gstm1 | -5.29701 | 3.588606 |
| Q9D3W4 | Gpn3 | -5.30892 | 3.240497 |
| Q8K2T1 | Nmral1 | -5.31858 | 2.653186 |
| P99025 | Gchfr | -5.34215 | 2.60512 |
| P17182 | Eno1 | -5.36261 | 3.42162 |
| Q9DCT1 | Akr1e2 | -5.3628 | 2.416802 |
| Q61033 | Tmpo | -5.37349 | 2.289898 |
| Q9D786 | Haus5 | -5.38096 | 3.04594 |
| Q9R1Z7 | Pts | -5.38173 | 2.629137 |
| Q9CY45 | Eef1akmt1 | -5.38703 | 3.39942 |
| P37889 | Fbln2 | -5.39602 | 3.194087 |
| O70503 | Hsd17b12 | -5.41108 | 2.874486 |
| P21300 | Akr1b7 | -5.41237 | 2.710927 |
| P97825 | Jpt1 | -5.41589 | 3.969205 |
| P70699 | Gaa | -5.42633 | 3.826167 |
| Q9D2Y4 | Mlkl | -5.43824 | 3.598367 |
| Q8VE94 | Fam110c | -5.45535 | 5.253471 |
| Q91V76 |  | -5.45649 | 4.011228 |
| Q8C8T8 | Tsr2 | -5.47057 | 2.087832 |
| P48024 | Eif1 | -5.48058 | 4.812324 |
| Q8VCR7 | Abhd14b | -5.48572 | 2.876617 |
| P35456 | Plaur | -5.50537 | 2.571749 |
| Q62470 | Itga3 | -5.50546 | 3.076066 |
| P10404 |  | -5.52142 | 2.602001 |
| P06797 | Ctsl | -5.53942 | 4.081175 |
| Q8VDT9 | Mrpl50 | -5.54421 | 3.694642 |
| Q8BGB5 | Limd2 | -5.58055 | 2.569398 |
| Q99KR3 | Lactb2 | -5.60681 | 3.693186 |
| P24860 | Ccnb1 | -5.66662 | 3.04594 |
| Q91YU8 | Ppan | -5.68955 | 3.288665 |
| Q8CJ27 | Aspm | -5.71822 | 2.520481 |
| Q8BK72 | Mrps27 | -5.72429 | 3.173385 |
| P56389 | Cda | -5.72538 | 2.255628 |
| P97315 | Csrp1 | -5.73447 | 4.846862 |
| Q3U155 | Ccdc174 | -5.75005 | 2.217547 |
| Q9D1R2 | Kti12 | -5.76014 | 3.614088 |
| Q8BUI3 | LRWD1 | -5.78813 | 4.767056 |
| O54974 | Lgals7 | -5.79349 | 3.688585 |
| Q9R1Q7 | Plp2 | -5.79597 | 4.222233 |
| O09159 | Man2b1 | -5.80201 | 3.053989 |
| P09926 | Surf2 | -5.81405 | 3.265529 |
| P52760 | Rida | -5.82003 | 3.704372 |
| Q9DCM0 | Ethe1 | -5.87281 | 3.474428 |
| P45377 | Akr1b8 | -5.89519 | 3.860029 |
| P81069 | Gabpb2 | -5.91285 | 3.206875 |
| P10107 | Anxa1 | -5.92659 | 5.217933 |
| Q8BSI6 | R3hcc1 | -5.93955 | 4.404322 |
| Q9JL35 | Hmgn5 | -5.98221 | 4.496508 |
| O89110 | Casp8 | -6.0059 | 2.451282 |
| P10923 | Spp1 | -6.01804 | 2.590912 |
| Q3TLP5 | Echdc2 | -6.07201 | 3.509511 |
| Q9CQS5 | Riok2 | -6.07483 | 2.198636 |
| Q9CQ18 | Rnaseh2c | -6.13821 | 2.386971 |
| Q6PDY2 | Ado | -6.17136 | 2.780906 |
| O08997 | Atox1 | -6.18472 | 5.771121 |
| Q9D083 | Spc24 | -6.21789 | 3.195766 |
| Q80ZS3 | Mrps26 | -6.23795 | 3.795884 |
| B1ARD6 | Slfn9 | -6.29342 | 2.630599 |
| P14901 | Hmox1 | -6.3089 | 4.106041 |
| Q3UPF5 | Zc3hav1 | -6.31409 | 3.935528 |
| P70202 | Lxn | -6.33266 | 4.199705 |
| P97450 | Atp5pf | -6.34044 | 2.730796 |
| P18572 | Bsg | -6.35903 | 3.86498 |
| Q9CXL3 | Chlsn | -6.3613 | 3.462407 |
| P48725 | Pcnt | -6.37174 | 3.009892 |
| P52927 | Hmga2 | -6.40331 | 2.480465 |
| O35381 | Anp32a | -6.41661 | 5.55166 |
| Q9QZN4 | Fbxo6 | -6.43476 | 3.999455 |
| Q3TYS2 | Cybc1 | -6.43665 | 3.307733 |
| Q9CQM5 | Txndc17 | -6.43777 | 5.32552 |
| Q62426 | Cstb | -6.45861 | 3.398145 |
| Q80U04 | Pja2 | -6.5026 | 4.237734 |
| P60330 | Espl1 | -6.50606 | 3.678163 |
| P16045 | Lgals1 | -6.53716 | 5.55166 |
| P00405 | Mtco2 | -6.5629 | 2.160149 |
| P51125 | Cast | -6.59445 | 2.786803 |
| P56135 | Atp5mf | -6.66547 | 4.863228 |
| P28474 | Adh5 | -6.68599 | 3.269576 |
| Q64105 | Spr | -6.71599 | 2.545351 |
| Q9D855 | Uqcrb | -6.73521 | 3.016433 |
| Q8BVY0 | Rsl1d1 | -6.76175 | 2.273497 |
| Q8BJY1 | Psmd5 | -6.8574 | 5.617406 |
| P98078 | Dab2 | -6.91826 | 3.178972 |
| Q80VJ3 | Dnph1 | -6.9467 | 3.765149 |
| P16858 | Gapdh | -7.01666 | 6.120043 |
| P15208 | Insr | -7.03631 | 3.925869 |
| Q9CRB2 | Nhp2 | -7.0532 | 4.552875 |
| P08207 | S100a10 | -7.18079 | 2.953572 |
| P19157 | Gstp1 | -7.23908 | 3.03 |
| P99028 | Uqcrh | -7.2742 | 3.552457 |
| Q64339 | Isg15 | -7.29821 | 3.108809 |
| P24452 | Capg | -7.34472 | 2.064389 |
| Q60854 | Serpinb6 | -7.36119 | 5.55166 |
| P15379 | Cd44 | -7.48524 | 3.398974 |
| Q9CPQ1 | Cox6c | -7.51194 | 3.191187 |
| Q9QZL0 | Ripk3 | -7.55617 | 4.831193 |
| P07091 | S100a4 | -7.62891 | 3.981152 |
| O35639 | Anxa3 | -7.64928 | 2.805867 |
| Q9CPQ8 | Atp5mg | -7.6876 | 2.514504 |
| O35215 | Ddt | -7.77039 | 4.734409 |
| P31786 | Dbi | -8.9557 | 4.777691 |
| O09131 | Gsto1 | -8.97059 | 4.496508 |
| P16110 | Lgals3 | -9.00589 | 3.94128 |

**Table S3.** *Protein signature of 2022 MPXV MOI 1 infected KO vs WT MEF lysates at 21 hours post-infection. Table lists the protein ID, the log2-fold change (FC) (MPXV infected WT MEFs vs infected ISG15 KO MEFs) of the levels of each protein, and the statistical significance (−log P value). Ordered from largest to smallest FC.*
