# Supplementary material for: ISG15 Differentially Modulates Clade Ib and II MPXV Infection
Source: Research Square preprint supplement (doi:10.21203/rs.3.rs-7774452/v1), 2025-10-16
Supplement: Supplementary file 4 [file 7ab5a5604bcf9f1559fc7785.docx]

**Figure S1.** *High-dose MPXV infection overcomes the antiviral function of ISG15* (a) WT and ISG15-KO MEFs were infected with four MPXV strains at high MOI, and total virus was quantified by plaque assay at 24 hpi. Data represent mean ± SD from three independant experiments. (b) WT and ISG15-KO MEFs infected with Clade II MPXV strains (MOI 1, 24 hpi); equal amounts of cell lysates were analysed by immunoblotting with antibodies against VACV early protein E3, intermediate protein F13, and late protein D8.

**Figure S2.** Venn Diagram displaying shared differentially expressed proteins across all MPXV KOvsWT Infections. Table displays Uniprot code, Protein Name and FCs of every KOvsWT MPXV strain.

**Figure S3.** Network graphs displaying the most enriched cellular component pathways comparing ISG15 KO vs WT MPXV infected MEFs for each strain. n= 20 pathways.

**Figure S4.** Protein-protein interactions (PPI) of ISG15 KO vs WT Clade II MPXV infected MEFs for each strain. n = 100 proteins.

**Figure S5.** Quality control (QC) plots from proteomic analysis. (a) Sample correlation clustering of 2022 MPXV infected MEFs proteomic analysis. (b) Sample correlation clustering of USA 2003 and WRAIR infected MEFs. (c) Sample correlation clustering, PCA and protein count QCs of 2024 MPXV infected MEFs. Mut nomenclature describes samples not present in the manuscript.

**Figure S6**. Biological Process, Molecular Function and Cellular Component pathway analysis of 2024 MPXV and USA 2003 phospho-proteomic KOvsWT results.

**Figure S7.** (a) Western blot of Clade II MPXV-infected MEFs (MOI 1, 21 hpi) using phospho-tyrosine and phospho-serine antibodies. (b) Sample correlation clustering of Clade II MPXV infected MEFs phospho-proteomic analysis. (c) Protein count. (d) Log2 Transformed Value distribution. (e) Value Mean per sample (f) PCA plot. WT and KO nomenclature is used to display samples in this study. Mut nomenclature describes samples not present in the manuscript.

**Figure S8.** (a)PCA clustering of Clade Ib MPXV infected MEFs phospho-proteomic analysis. (b) Protein count. (c) Log2 Transformed Value distribution. (d) Value Mean per sample.

**Figure S9**. Kinase Enrichment Analysis of differentially expressed proteins in MPXV KOvsWT through total proteome analysis.

**Figure S10**. Kinase Enrichment Analysis of differentially expressed proteins of 2024 MPXV and USA 2003 KOvsWT results obtained through phospho-proteomic analysis.
