# Supplementary material for: ISG15 Differentially Modulates Clade Ib and II MPXV Infection
Source: Research Square preprint supplement (doi:10.21203/rs.3.rs-7774452/v1), 2025-10-16
Supplement: Supplementary file 8 [file e4c8717be6af384f0b602e92.docx]

| **Name** | **Gene** | **fold_change** | **p_value_adj_neg_log10** |
| --- | --- | --- | --- |
| Q64133 | Maoa | 5.41817468 | 2.64129563 |
| P37804 | Tagln | 4.20041172 | 5.63621869 |
| Q9WUU7 | Ctsz | 3.0348296 | 2.18266766 |
| Q08091 | Cnn1 | 2.98761663 | 2.41804287 |
| P39876 | Timp3 | 2.63817741 | 2.88167392 |
| A0A7H0DNC4 | OPG153 | 2.57040889 | 4.59433318 |
| A0A7H0DND9;Q8V4T7 | A0A7H0DND9;Q8V4T7 | 2.52912269 | 4.08929165 |
| P0DTN3 | OPG154 | 2.47203188 | 3.95739693 |
| P01831 | Thy1 | 2.44945154 | 2.86897078 |
| A0A7H0DNF1 | OPG189 | 2.39690046 | 2.94859915 |
| Q60760 | Grb10 | 2.37941809 | 4.59433318 |
| A0A7H0DN48 | OPG075 | 2.29442718 | 4.43256433 |
| Q9CZC8 | Scrn1 | 2.24456876 | 3.29498543 |
| M1L535 | OPG128 | 2.1989101 | 3.97913204 |
| E9Q0S6 | Tns1 | 2.18443868 | 3.30808188 |
| P97447 | Fhl1 | 2.15041046 | 5.61416357 |
| A0A7H0DN72 | OPG100 | 2.13642459 | 4.32448011 |
| A0A7H0DNF4 | OPG192 | 2.12997134 | 4.36155562 |
| M1L511 | OPG098 | 2.10899321 | 4.18278356 |
| A0A7H0DNA2 | OPG130 | 2.06723164 | 4.38481708 |
| M1L9Q3 | OPG137 | 2.06035379 | 3.97913204 |
| A0A7H0DN26 | OPG053 | 2.05847327 | 3.62341064 |
| A0A7H0DN80 | OPG108 | 2.05369344 | 3.96643416 |
| M1L502 | OPG088 | 2.03341237 | 4.43190076 |
| M1KJ27 | OPG129 | 2.03238607 | 3.88296279 |
| Q8BEJ6 | OPG185 | 2.03052923 | 3.25615871 |
| A0A7H0DN45 | OPG072 | 2.02126913 | 3.69654193 |
| A0A7H0DN35 | OPG062 | 1.99867607 | 2.90458012 |
| A0A7H0DNA8 | OPG136 | 1.99400235 | 4.18278356 |
| A0A7H0DN25 | OPG052 | 1.98033135 | 3.88296279 |
| A0A7H0DN46 | OPG073 | 1.96188867 | 3.88296279 |
| A0A7H0DN43 | OPG070 | 1.94368345 | 3.93499852 |
| P14901 | Hmox1 | 1.94019181 | 3.85858374 |
| M1L543 | OPG138 | 1.93952561 | 4.35907065 |
| A0A7H0DNB6 | OPG144 | 1.92336348 | 3.62111441 |
| A0A7H0DNB8 | OPG146 | 1.92316085 | 3.78691588 |
| Q9WTQ5 | Akap12 | 1.8893644 | 4.60089573 |
| A0A7H0DN42 | OPG069 | 1.8637745 | 4.35907065 |
| M1LBQ5 | OPG115 | 1.85741377 | 4.5110377 |
| Q91XV3 | Basp1 | 1.82524337 | 4.38157648 |
| A0A7H0DN41 | OPG068 | 1.8233813 | 4.02283416 |
| A0A7H0DN78 | OPG106 | 1.8169779 | 3.15045901 |
| A0A7H0DN79 | OPG107 | 1.7662099 | 2.56456882 |
| A0A7H0DNB2 | OPG140 | 1.76242 | 3.19527607 |
| P16460 | Ass1 | 1.74239159 | 4.18278356 |
| A0A7H0DN92;Q8V4Y0 | A0A7H0DN92;Q8V4Y0 | 1.73731391 | 3.36936623 |
| A0A7H0DN97 | OPG125 | 1.73243049 | 4.15331586 |
| A0A7H0DNB4 | OPG142 | 1.72048074 | 2.87489709 |
| A0A7H0DND7 | OPG166 | 1.71891742 | 2.08075957 |
| A0A7H0DN76 | OPG104 | 1.71506012 | 3.86376832 |
| A0A7H0DN69 | OPG097 | 1.69267338 | 3.91658313 |
| A0A7H0DN49;Q8V518 | A0A7H0DN49;Q8V518 | 1.67822105 | 4.35677631 |
| A0A7H0DN84 | OPG112 | 1.67389389 | 3.41760998 |
| A0A7H0DN81 | OPG109 | 1.65871518 | 3.80609339 |
| A0A7H0DNC1 | OPG149 | 1.65497269 | 3.68231326 |
| A0A7H0DND2 | OPG161 | 1.6262564 | 4.38157648 |
| A0A7H0DN74 | OPG102 | 1.60613721 | 4.43190076 |
| Q9CPN8 | Igf2bp3 | 1.60289814 | 3.45721192 |
| A0A7H0DN23 | OPG050 | 1.59122744 | 3.79739796 |
| M1LLA2 | OPG126 | 1.59061699 | 3.68231326 |
| A0A7H0DN57 | OPG085 | 1.57647219 | 3.68231326 |
| A0A7H0DN89 | OPG117 | 1.56963386 | 4.32448011 |
| A0A7H0DNA4 | OPG132 | 1.56809701 | 3.93499852 |
| A0A7H0DN30 | OPG057 | 1.5680919 | 3.30808188 |
| P0DTM9 | OPG001 | 1.55008347 | 3.98850257 |
| A0A7H0DND1 | OPG160 | 1.54145987 | 4.60089573 |
| A0A7H0DN90 | OPG118 | 1.52926933 | 2.74908854 |
| A0A7H0DN56 | OPG084 | 1.5282049 | 3.89706805 |
| A0A7H0DNC3 | OPG151 | 1.52022217 | 4.0543463 |
| A0A7H0DNA5 | OPG133 | 1.51486887 | 4.34357393 |
| P0DTN1 | OPG139 | 1.51302556 | 2.83909421 |
| P0DTN2 | OPG190 | 1.50444672 | 3.97913204 |
| A0A7H0DN66 | OPG094 | 1.50099169 | 3.31182836 |
| A0A7H0DN37 | OPG064 | 1.49298785 | 3.357757 |
| A0A7H0DN91 | OPG119 | 1.46999038 | 3.3199828 |
| A0A7H0DN95 | OPG123 | 1.45654505 | 4.32448011 |
| A0A7H0DN82 | OPG110 | 1.45528722 | 3.98850257 |
| A0A7H0DN96 | OPG124 | 1.44767908 | 3.97913204 |
| P0DTN4 | OPG035 | 1.44362433 | 3.7390271 |
| A0A7H0DN29 | OPG056 | 1.4334019 | 4.13628944 |
| Q8K157 | Galm | 1.42667568 | 4.43190076 |
| A0A7H0DNB7 | OPG145 | 1.41465621 | 4.29747285 |
| M1L514 | OPG103 | 1.41355385 | 4.32448011 |
| M1LBP0 | OPG099 | 1.41296002 | 3.26098029 |
| A0A7H0DN85 | OPG113 | 1.38511162 | 3.7247093 |
| Q9DC11 | Plxdc2 | 1.38202981 | 3.53542567 |
| P13595 | Ncam1 | 1.38072123 | 4.35907065 |
| A0A7H0DNA3 | OPG131 | 1.37706483 | 3.54325203 |
| A0A7H0DN36 | OPG063 | 1.31189673 | 3.84769339 |
| A0A7H0DN27 | OPG054 | 1.30595553 | 4.22691207 |
| A0A7H0DNB5 | OPG143 | 1.28743211 | 3.70282362 |
| A0A7H0DN77 | OPG105 | 1.28672911 | 4.01692596 |
| P58774 | Tpm2 | 1.28089572 | 4.36155562 |
| P62746 | Rhob | 1.28020963 | 3.36086572 |
| A0A7H0DN32 | OPG059 | 1.27989594 | 3.30808188 |
| A0A7H0DNC6;Q8V4U9 | A0A7H0DNC6;Q8V4U9 | 1.27468613 | 2.80553911 |
| Q63918 | Cavin2 | 1.25846507 | 4.18278356 |
| Q9DCT8 | Crip2 | 1.24857879 | 3.13951484 |
| M1KJ15 | OPG114 | 1.24229405 | 4.18278356 |
| Q9CWS0 | Ddah1 | 1.22472719 | 3.88296279 |
| A0A7H0DNE3;Q8V4T3 | A0A7H0DNE3;Q8V4T3 | 1.2007954 | 3.81598824 |
| A0A7H0DN39 | OPG066 | 1.19912522 | 3.69654193 |
| A0A7H0DND5 | OPG164 | 1.19225118 | 2.95896891 |
| P97315 | Csrp1 | 1.18603303 | 3.26098029 |
| A0A7H0DN62 | OPG090 | 1.18545847 | 3.12207827 |
| A0A7H0DNC7 | OPG156 | 1.1811344 | 3.12479801 |
| Q9ET54 | **Palld** | 1.16286757 | 5.35085149 |
| O88667 | Rrad | 1.12486797 | 3.39927015 |
| A0A7H0DNE6 | OPG180 | 1.12018306 | 3.68231326 |
| A0A7H0DN99 | OPG127 | 1.10645293 | 2.96662547 |
| P20352 | F3 | 1.10363855 | 3.26972509 |
| A0A7H0DN63 | OPG091 | 1.10354369 | 2.02743906 |
| Q8R5F7 | Ifih1 | 1.08457538 | 4.2117655 |
| A0A7H0DMZ8 | OPG022 | 1.07460985 | 2.0464144 |
| Q9CQQ4 | Gemin2 | 1.06272765 | 4.15331586 |
| P58771 | Tpm1 | 1.04562493 | 3.43253296 |
| P17879 | Hspa1b | 1.03152226 | 5.63621869 |
| M1LL92 | OPG116 | 1.02255826 | 2.12279394 |
| A0A7H0DN20 | OPG047 | 1.02034444 | 3.14150718 |
| M1L9M0 | OPG082 | 1.01377193 | 3.01131723 |
| Q7TPR4 | Actn1 | 1.00658347 | 4.8086869 |
| Q9JHI5 | Ivd | 0.98624306 | 2.62527422 |
| A0A7H0DN19 | OPG046 | 0.98487663 | 3.94801723 |
| Q9QZ06 | Tollip | 0.97889328 | 3.26098029 |
| Q7TMM9 | Tubb2a | 0.9679465 | 3.29262033 |
| A0A7H0DND3 | OPG162 | 0.95619782 | 2.80230288 |
| Q9CWF2 | Tubb2b | 0.95480275 | 3.68231326 |
| A0A7H0DNE4 | OPG176 | 0.95186285 | 3.79473596 |
| A0A7H0DNE7 | OPG181 | 0.94956609 | 3.49992944 |
| Q8BFW7 | Lpp | 0.9472551 | 4.36155562 |
| A0A7H0DN22 | OPG049 | 0.94375743 | 2.41152681 |
| Q01730 | Rsu1 | 0.9388603 | 3.0504617 |
| O88428 | Papss2 | 0.93865902 | 3.08874178 |
| Q61553 | Fscn1 | 0.93060662 | 4.17224548 |
| A0A7H0DN15 | OPG042 | 0.92957482 | 2.94722487 |
| P37889 | Fbln2 | 0.9210309 | 3.47808345 |
| O35682 | Myadm | 0.90271723 | 2.1672988 |
| Q9Z2V5 | Hdac6 | 0.88894475 | 3.18177452 |
| Q08093 | Cnn2 | 0.87495312 | 4.38157648 |
| Q05816 | Fabp5 | 0.87274858 | 2.85123627 |
| Q8BMK4 | Ckap4 | 0.87178424 | 3.29901494 |
| A0A7H0DN51 | OPG079 | 0.87013165 | 3.69654193 |
| A0A7H0DND0 | OPG159 | 0.86200155 | 3.01131723 |
| Q8VHX6 | Flnc | 0.85828727 | 4.43190076 |
| P70444 | Bid | 0.85772228 | 2.51751834 |
| A0A7H0DN83 | OPG111 | 0.84191635 | 2.37272409 |
| Q99MI1 | Erc1 | 0.84127149 | 3.69654193 |
| Q61391 | Mme | 0.84076398 | 4.19228185 |
| A0A7H0DNE0 | OPG172 | 0.83522875 | 2.40057164 |
| Q9CYL5 | Glipr2 | 0.81403449 | 2.40063669 |
| P16125 | Ldhb | 0.79871551 | 3.26972509 |
| A0A7H0DN61 | OPG089 | 0.7879242 | 2.76370784 |
| O70400 | Pdlim1 | 0.78592474 | 3.29901494 |
| P23949 | Zfp36l2 | 0.7838824 | 2.52643722 |
| P43274 | H1-4 | 0.7792002 | 2.68764512 |
| A0A7H0DN18 | OPG045 | 0.76694069 | 2.92933411 |
| Q64727 | Vcl | 0.76387745 | 3.93499852 |
| P97352 | S100a13 | 0.76190336 | 2.62886487 |
| Q64337 | Sqstm1 | 0.75681371 | 3.33587475 |
| O35639 | Anxa3 | 0.74978349 | 3.97913204 |
| Q64442 | Sord | 0.74850031 | 2.11533298 |
| Q9WTI7 | Myo1c | 0.73468445 | 4.18278356 |
| D3YYU8 | Obsl1 | 0.73198293 | 2.09962456 |
| A0A7H0DNC0 | OPG148 | 0.73166964 | 3.86376832 |
| A0A7H0DN13 | OPG040 | 0.72179209 | 2.88784928 |
| Q01149 | Col1a2 | 0.72028029 | 2.28613176 |
| Q3U962 | Col5a2 | 0.71796282 | 2.45195004 |
| A0A7H0DN38 | OPG065 | 0.71759505 | 2.96662547 |
| A0A7H0DN03 | OPG019 | 0.71488121 | 2.27038075 |
| Q91ZJ5 | Ugp2 | 0.71061329 | 3.86376832 |
| Q8CJ40 | Crocc | 0.7103869 | 2.32698523 |
| Q8C129 | Lnpep | 0.71014454 | 3.00537496 |
| Q8K1N2 | Phldb2 | 0.70699225 | 3.14576803 |
| Q9CZT8 | Rab3b | 0.70379645 | 2.49834516 |
| Q925B0 | Pawr | 0.69097851 | 2.17720674 |
| P17156 | Hspa2 | 0.67556078 | 2.8742758 |
| A0A7H0DN44 | OPG071 | 0.67545859 | 2.80553911 |
| Q9Z2D3 | Gsdme | 0.67091434 | 2.23971977 |
| A0A7H0DN21 | OPG048 | 0.65941424 | 3.02160568 |
| O54724 | Cavin1 | 0.65848167 | 3.48972892 |
| Q62419 | Sh3gl1 | 0.64212067 | 4.2117655 |
| Q62261 | Sptbn1 | 0.63382835 | 4.2117655 |
| O35640 | Anxa8 | 0.6325809 | 2.82842883 |
| Q61576 | Fkbp10 | 0.62614588 | 2.65723038 |
| Q921X9 | Pdia5 | 0.62594204 | 2.33596059 |
| A0A7H0DNE9 | OPG187 | 0.61763099 | 2.48083544 |
| Q6IRU2 | Tpm4 | 0.61265091 | 2.65336184 |
| P97792 | Cxadr | 0.61198684 | 2.6246295 |
| Q9WV92 | Epb41l3 | 0.61056009 | 3.41760998 |
| P16546 | Sptan1 | 0.60872768 | 4.43190076 |
| Q62087 | Pon3 | 0.60733837 | 2.66194915 |
| Q6NSR8 | Npepl1 | 0.60448257 | 2.63397785 |
| Q8R3B1 | Plcd1 | 0.60258482 | 2.22408854 |
| Q8BTM8 | Flna | 0.59651127 | 4.47645234 |
| Q62433 | Ndrg1 | 0.59552768 | 2.17441512 |
| P62737;P63268;P68033 | P62737;P63268;P68033 | 0.59513825 | 3.42445591 |
| P06801 | Me1 | 0.59077999 | 2.38194262 |
| A2AJI0 | Map7d1 | 0.58426941 | 3.39927015 |
| Q9CWZ7 | Napg | 0.5840876 | 2.39959644 |
| Q61001 | Lama5 | -0.5817429 | 2.40063669 |
| Q9CR62 | Slc25a11 | -0.5864918 | 2.12880235 |
| Q3TBT3 | Sting1 | -0.588073 | 3.357757 |
| Q9JLB0 | Pals2 | -0.5892084 | 3.14150718 |
| P63028 | Tpt1 | -0.5895016 | 2.01793926 |
| P48722 | Hspa4l | -0.6075834 | 3.70812383 |
| P05064 | Aldoa | -0.6377334 | 3.88847044 |
| P51480 | Cdkn2a | -0.6423136 | 2.51467994 |
| Q91Z53 | Grhpr | -0.6547376 | 2.06342669 |
| Q61127 | Nab2 | -0.6638152 | 2.62762203 |
| P51569 | Gla | -0.6689614 | 2.13572374 |
| Q3THG9 | Aarsd1 | -0.6708908 | 3.43253296 |
| P97384 | Anxa11 | -0.680465 | 2.49678694 |
| P29758 | Oat | -0.686064 | 2.85376103 |
| P01901 | H2-K1 | -0.6929897 | 2.52715123 |
| Q9QZD8 | Slc25a10 | -0.695189 | 2.08530823 |
| P48036 | Anxa5 | -0.7025563 | 3.29901494 |
| E9Q555 | Rnf213 | -0.731352 | 2.62886487 |
| P06745 | Gpi | -0.7432198 | 3.46813832 |
| Q8R059 | Gale | -0.7454152 | 3.05520282 |
| P45376 | Akr1b1 | -0.7513962 | 2.35273893 |
| P12382 | Pfkl | -0.7656194 | 3.23291427 |
| P18155 | Mthfd2 | -0.7673553 | 2.44424151 |
| P06151 | Ldha | -0.806309 | 4.01692596 |
| Q9WTK5 | Nfkb2 | -0.8184681 | 2.47193358 |
| Q8BHL4 | Gprc5a | -0.8260786 | 2.52130024 |
| P54116 | Stom | -0.8319244 | 3.44637933 |
| P45377 | Akr1b8 | -0.8399835 | 3.30808188 |
| Q04447 | Ckb | -0.8881764 | 3.5120023 |
| P06797 | Ctsl | -0.9031098 | 3.33944467 |
| P70677 | Casp3 | -0.9115966 | 3.35517714 |
| P09411 | Pgk1 | -0.9254591 | 4.59220657 |
| Q9QZF2 | Gpc1 | -0.9261183 | 2.69261501 |
| P18572 | Bsg | -0.97673 | 3.54546642 |
| P97930 | Dtymk | -0.9978039 | 2.4615606 |
| Q9QUJ7 | Acsl4 | -1.0016079 | 3.93499852 |
| O09131 | Gsto1 | -1.0417769 | 4.13628944 |
| Q9CQ43 | Dut | -1.0471969 | 4.35907065 |
| Q8R5M8 | Cadm1 | -1.1326186 | 3.0381923 |
| Q8R550 | Sh3kbp1 | -1.139656 | 3.68231326 |
| P47226 | Tes | -1.1649551 | 3.30681128 |
| Q9QZL0 | Ripk3 | -1.3185087 | 4.2117655 |
| Q9D1L0 | Chchd2 | -1.3614979 | 3.43686676 |
| P62274 | Rps29 | -1.4894242 | 2.86374678 |
| P10400 | Pol | -1.5922444 | 2.88784928 |
| Q61850 | **Foxc2** | -1.7157344 | 3.24144012 |
| Q9Z0E6 | Gbp2 | -1.80768 | 2.01913104 |
| P51912 | Slc1a5 | -1.8318717 | 2.34278259 |
| Q3V038 | Ttc9 | -1.8679184 | 3.30808188 |
| P11370 | Fv4 | -2.3543828 | 2.27038075 |
| P43135 | Nr2f2 | -2.5594778 | 2.77405856 |
| Q64339 | Isg15 | -3.0901943 | 2.75708857 |
| P10923 | Spp1 | -4.1122111 | 2.27247113 |

**Table S1.** *Protein signature of 2024 MPXV MOI 1 infected KO vs WT MEF lysates at 21 hours post-infection. Table lists the protein ID, the log2-fold change (FC) (MPXV infected WT MEFs vs infected ISG15 KO MEFs) of the levels of each protein, and the statistical significance (−log P value). Ordered from largest to smallest FC. In bold, mentioned proteins in manuscript.*
